1 **The model of local axon homeostasis - explaining the role and regulation of microtubule**  
2 **bundles in axon maintenance and pathology**

3  
4 Ines Hahn, André Voelzmann, Yu-Ting Liew, Beatriz Costa-Gomes, Andreas Prokop<sup>#</sup>

5  
6 The University of Manchester, Manchester Academic Health Science Centre, Faculty of Biology,  
7 Medicine and Health, School of Biology, Manchester, UK

8  
9 Running title: The role of microtubules in axon pathology

10 Key words: *Drosophila*, neurodegeneration, axons, actin, cytoskeleton, microtubules

11  
12 <sup>#</sup> author for correspondence:  
13 The University of Manchester  
14 Faculty of Life Sciences  
15 Oxford Road  
16 Manchester M13 9PT  
17 Tel: +44-(0)161-27-51556  
18 Fax: +44-(0)161-27-51505  
19 Andreas.Prokop@manchester.ac.uk

20  
21  
22 **Abstract**

23  
24 Axons are the slender, cable-like, up to meter-long projections of neurons that electrically wire our  
25 brain and body. In spite of their challenging morphology, they usually need to be maintained for an  
26 organism's lifetime. This makes them key lesion sites in pathological processes of ageing, injury  
27 and neurodegeneration. To better understand how axons are formed and maintained long-term,  
28 we focus here on the parallel bundles of microtubules (MTs) which form their indispensable  
29 structural backbones and highways for life-sustaining cargo transport and organelle dynamics.  
30 Many MT-binding and -regulating proteins in axons have prominent hereditary links to axon  
31 degeneration, but knowing their molecular roles is usually insufficient to explain their roles during  
32 axon morphogenesis, maintenance or pathology. Such understanding requires deciphering how  
33 these proteins interact in regulatory networks to implement observed cellular phenomena. Here we  
34 propose the model of local axon homeostasis as a conceptual framework that attempts to combine  
35 current knowledge into one coherent interactome. According to this model, each area of an axon  
36 is self-sustaining through local auto-regulatory networks; these networks maintain a balance  
37 between (1) the enormous mechanical challenges posed by the life-sustaining intra-axonal motor  
38 dynamics and (2) the maintenance activities required to sustain MT bundles as the highways  
39 needed for those dynamics. This model offers a new level of explanation, and we hope that it will  
40 help to raise the interest in axonal MTs and lead to the generation of more data that can help to  
41 decipher the important contributions of MTs to axon biology and pathology.

42

## 43 Introduction

44 Axons are the slender, cable-like extensions of nerve cells which form the nerves and nerve tracts  
45 that wire our brain and body, sending neuronal messages in highly regulated manners. With  
46 diameters of only 0.1-15 $\mu$ m (Hoffman, 1995), they extend over distances of up to a meter in  
47 humans. To adopt such a unique morphology and physiology, axons display many specialised  
48 features (Fig.1).

49 Axons are indispensable for nervous system function, as illustrated by paralysis in spinal cord injury  
50 caused by the interruption of ascending and descending axon tracts (Bichenback, 2013; Tedeschi  
51 and Bradke, 2016). Axons are key lesion sites in injury-induced trauma and coma (Gaetz, 2004;  
52 Medana and Esiri, 2003; Smith et al., 2000; Tang-Schomer et al., 2012), and axon decay is believed  
53 to be the trigger for neuronal loss in ageing and many neurodegenerative disorders (Adalbert and  
54 Coleman, 2012; Salvadores et al., 2017). Notably, most neurons cannot be replaced, and  
55 compensation of lost axons through collateral branching of intact neighbouring axons has obvious  
56 limitations (Adalbert and Coleman, 2012; Sturrock, 1987).

57 This means that most axons have to be maintained for an organism's life time, i.e. up to a century  
58 in humans; unsurprisingly, mammals tend to lose almost half their axon mass towards high age  
59 (Calkins, 2013; Marner et al., 2003). This trend is severely enhanced in neurodegenerative  
60 disorders, as illustrated by gradually increasing paralysis in spastic paraplegia or motorneuron  
61 disease (Blackstone et al., 2011; Riancho et al., 2019).

62 Research into neurodegenerative disorders typically approaches the problem by describing  
63 observed phenotypes and unravelling the molecular mechanisms performed by proteins linked to  
64 the disease. However, it seems that this approach rarely leads to satisfactory explanations of the  
65 pathology (Aguzzi, 2019). We believe that more profound understanding will arise when widening  
66 the scope from molecular to cellular mechanisms, by studying how proteins work within regulatory  
67 networks to underpin observable processes of axon biology - thus performing investigations at the  
68 level of complexity at which pathology becomes manifest. Here we will illustrate this approach by  
69 focussing on the axonal cytoskeleton.

70

## 71 The importance of microtubule bundles for axon biology

72 As illustrated in Fig. 1, the cytoskeleton of the axon shaft consists of straight parallel bundles of  
73 MTs, which are interspersed with intermediate filaments (not shown) and longitudinal actin fibres  
74 called 'actin trails' - all running through evenly spaced periodic rings of cortical actin (Qu et al.,  
75 2017; Xu et al., 2013); significant deviations from this organisation, that will not be addressed in  
76 this review, exist at axon initial segments (not shown), growth cones and synapses (Dent et al.,  
77 2011; Leterrier, 2018; Leterrier et al., 2017; Prokop, 2013).

78 Of the three cytoskeleton classes, intermediate filaments were suggested by anatomical,  
79 developmental and genetic studies to regulate axon diameter, and their axonal aggregation is a  
80 hallmark of many neurodegenerative diseases (Friede and Samorajski, 1970; Hoffman, 1995;  
81 Perrot et al., 2008; Rao et al., 2003; Sakaguchi et al., 1993). However, intermediate filament  
82 accumulations are not necessarily the cause, but can be the consequence of axon decay (Eyer et  
83 al., 1998; Nguyen et al., 2000; Perrot et al., 2008). Notably, *Neurofilament-H-lacZ* mutant mice or  
84 *Quiver* mutant quail completely lacking axonal intermediate filaments, develop and breed fairly  
85 normally (Eyer and Peterson, 1994; Yamasaki et al., 1991), and various arthropods form axons of

86 defined diameters in the absence of any axonal intermediate filaments (Allen et al., 2006; Hirokawa,  
87 1986; Voelzmann et al., 2016a). These examples suggest that intermediate filaments play no key  
88 roles in axon growth and maintenance. In contrast, the actin and microtubule (MT) cytoskeleton  
89 are essential for all stages of neuronal development and maintenance (Sakakibara et al., 2013;  
90 Voelzmann et al., 2016a) and this review will focus on the role and regulation of MTs.

91 MTs in axons are arranged into bundles which run all along axon shafts and are essential for their  
92 biology in at least three ways. Firstly, they serve as structural backbones, comparable to the  
93 vertebral column of a snake; since MTs in these bundles are discontinuous and expected to be  
94 interlinked via flexible connections (see section on cross-linkers), they are ideally suited to respond  
95 to longitudinal stretch and compression (similar to a half-extended telescope ladder), but also to  
96 torsion and flexure (Fig.2).

97 Secondly, MT bundles provide the highways for life-sustaining axonal transport between cell bodies  
98 and the axonal compartment. This transport is driven anterogradely by kinesins and retrogradely  
99 by the dynein/Dynactin complex; the cargoes include mRNAs, cytoplasmic proteins including  
100 signalling factors, vesicles delivering synaptic proteins, adhesion factors, neuropeptides and/or  
101 membrane lipids, as well as entire organelles including mitochondria (Fig. 3A-D; Goldstein et al.,  
102 2008; Gondre-Lewis et al., 2012; Gonzalez and Couve, 2014; Hirokawa et al., 2010; Pfenninger,  
103 2009). Furthermore, local dynamics of organelles, such as fission or fusion of mitochondria, can be  
104 expected to require forces generated by MT-associated motor proteins (Fig. 3E; Saxton and  
105 Hollenbeck, 2012).

106 Third, axonal bundles provide a source for readily available MTs that can be used for other  
107 purposes (curved arrows in Fig.1); for example, splaying MTs can trigger axon extension processes  
108 in growth cones (Dent et al., 2011; Prokop et al., 2013), induce collateral branch formation along  
109 the axon shaft (Kalil and Dent, 2014), or support physiological changes at synapses (Bodaleo and  
110 Gonzalez-Billault, 2016).

111 Maintaining MT bundles is therefore crucial for axon longevity. Accordingly, there are prominent  
112 and numerous genetic links from MT regulators to hereditary neurodegenerative disorders (Suppl.  
113 Mat. in Prokop et al., 2013), and axon decay is a frequent side effect of MT-targeting  
114 chemotherapies (Prior et al., 2017; Wozniak et al., 2018; Wu et al., 2014). Of particular interest for  
115 this review are reports of pathological axon swellings where MT bundles have disintegrated into  
116 loops or waves (bottom of Fig.3), occurring in ageing, after injury and in certain axonopathies  
117 (Adalbert et al., 2009; Bernier and Kothary, 1998; Dalpe et al., 1998; Denton et al., 2014; Fassier  
118 et al., 2013; Havlicek et al., 2014; Sorbara et al., 2014; Tang-Schomer et al., 2012; Tarrade et al.,  
119 2006; Yamasaki et al., 1991; Yin et al., 2016). Notably, one study suggests that MT aberration upon  
120 ageing could cause swellings that trap and damage mitochondria, thus triggering axon  
121 degeneration (Fiala et al., 2007). However, in the existing literature too little emphasis is given to  
122 MTs and there are simply not enough data to deduce meaningful correlations between axon  
123 degeneration and MT bundle decay.

124 Even if there were a close correlation, this still does not exclude that, depending on the pathological  
125 condition, MT bundle deterioration may be a mere consequence rather than cause of axon decay  
126 (details in Fig.4). Ultimate clarification will only arise from developing a better understanding of MT  
127 bundle-forming and -maintaining machinery. Here we propose a conceptual framework that may  
128 facilitate such developments.

129

130 The integrated model of local axon homeostasis

131 The foundations for this conceptual framework were laid when we took the decision to use the fruit  
132 fly *Drosophila melanogaster* as a means to study how cytoskeletal regulators collaborate in  
133 orchestrating the morphogenetic changes that drive axon growth (Sánchez-Soriano et al., 2007).  
134 *Drosophila* is not a miniature human, but it has many advantages and provides powerful means to  
135 uncover the regulatory concepts behind the roles and regulation of axonal MTs, which then often  
136 apply to higher organisms (Box 1; Aguzzi, 2019; Bellen et al., 2010; Elden et al., 2010; Prokop,  
137 2018). Through using *Drosophila* neurons as a consistent standardised cell system, our group  
138 alone performed functional analyses of over 50 actin- and/or MT-binding or -associating regulators  
139 (Prokop et al., 2013); these studies form an unprecedented pool of data on the basis of which to  
140 develop novel concepts (Alves-Silva et al., 2012; Beaven et al., 2015; Gonçalves-Pimentel et al.,  
141 2011; Qu et al., 2018; Qu et al., 2017; Voelzmann et al., 2016b).

#### **Box1** Why using *Drosophila*?

The use of *Drosophila* neurons to study the neuronal cytoskeleton has a number of advantages that were detailed elsewhere (Prokop et al., 2013). Key aspects are the high degree of conservation of cytoskeletal proteins, regulators and dynamics, the experimental amenability of neurons in primary cell culture and *in vivo* (Prokop et al., 2013; Prokop et al., 2012; Sánchez-Soriano et al., 2010), and the relative ease of genetic manipulation based on available resources and efficient combinatorial genetics (Hahn et al., 2016). The power of combinatorial genetics is rooted in the relative ease, speed and cost effectiveness with which genes can be manipulated and functionally analysed, facilitating also combined analyses of multiple factors in the same animals/cells (Prokop, 2018; Prokop et al., 2013; Roote and Prokop, 2013). Combinatorial genetics has been extremely successful in overcoming problems of redundancy, and generating new conceptual understanding of co-operative networks of MT regulation (see main text). This can hardly be achieved through isolated work on individual factors.

142  
143 Our loss-of-function analyses of 24 MT-binding or -associating (2<sup>nd</sup> order) proteins, revealed that  
144 more than half displayed significant MT disorganisation. Interestingly, the MT disorganisation found  
145 in these various conditions appears to display certain common characteristics: axons display areas  
146 in which their bundles are dissolved into chaotic, intertwined, crisscrossing arrangements of curled  
147 MTs (see examples in Fig.5). Notably, when using the same genetic conditions *in vivo*, comparable  
148 phenotypes were observed in the fly brain (Qu et al., 2018). Such *in vivo* phenotypes in the fly  
149 remind of the curled MT conformations in pathological axon swellings of mammalian models  
150 mentioned in the previous section. Potential evolutionary conservation of this phenomenon is also  
151 supported by the occurrence of MT curling and disorganisation in mouse and rat primary neurons  
152 (Ahmad et al., 2006; Sánchez-Soriano et al., 2009).

153 As an attempt to explain this surprising phenotype across mutant conditions and animal groups,  
154 we developed the model of 'local axon homeostasis' (Prokop, 2016; Voelzmann et al., 2016a). The  
155 model states that MTs, which usually behave like rigid rods (Hawkins et al., 2010), are challenged  
156 to buckle ('d' in Fig.3) and/or curl up by the force-enriched axonal environment ('A-E' in Fig.3;  
157 detailed in the next two sections). Through this bias towards MT curling, the parallel axon bundles  
158 are at risk of becoming disorganised and turning into pathological swellings. The model therefore  
159 proposes that this destructive tendency of axonal MTs is contained through the action of different  
160 classes of MT-associating and -regulating proteins, which co-operate and complement each other  
161 to form robust machinery that 'tames' MTs into bundles ('1-16' in Fig.3).

162 In this model, each axon segment uses local mechanisms to maintain its bundled MT organisation  
163 (hence 'local axon homeostasis'). Hereditary or acquired loss of single regulators would therefore  
164 be expected to weaken this machinery and increase the statistical risk of MT disorganisation. Such  
165 heightened probability might explain why many axonopathies affect primarily long axons (Prior et  
166 al., 2017), and why certain disorders linked to MT regulators display late onset axon decay  
167 (Voelzmann et al., 2017).

168 In the next two sections, we describe potential mechanisms underlying deteriorating destructive  
169 MT behaviours in axons and their relationship to molecular motor proteins. We will then summarise  
170 experimentally demonstrated MT maintaining and 'taming' mechanisms, and speculate about  
171 further potential maintenance mechanisms based on existing knowledge of known classes of  
172 axonal MT-regulating proteins.

173

### 174 Understanding the unusual curling behaviour of MTs in axons

175 MTs are polar polymers composed of  $\alpha/\beta$ -tubulin heterodimers which are arranged in a head-to-  
176 tail fashion into linear protofilaments; mostly 13 of these protofilaments are laterally aligned forming  
177 a straight tube of roughly 25 nm diameter (Fig.6A, C). But MTs can deviate from this norm: for  
178 example, axonal MTs were reported to contain 13 protofilaments in frog olfactory or goldfish brain  
179 axons, 11 or 15 in *C. elegans*, and 12 in *Drosophila*, crayfish and lobster (Benshalom and Reese,  
180 1985; Burton et al., 1975; Savage et al., 1989). Deviation from the straight 13 protofilament  
181 conformation equips MTs with distinct, functionally relevant physical properties (Chaaban and  
182 Brouhard, 2017; Chalfie and Thomson, 1982). Importantly, protofilaments in these deviating MTs  
183 are skewed and cause a supertwist of the tubule (Fig.6D; Chrétien and Fuller, 2000; Chrétien et  
184 al., 1996; Chrétien and Wade, 1991); this supertwist forces motor proteins to rotate around MTs  
185 (Ray et al., 1993) and is the likely explanation for supercoil of entire axons observed upon MT  
186 bundle destabilisation (Krieg et al., 2017; Shaw and Bray, 1977).

187 MTs are structurally active, and their properties can change upon protein binding (see interactions  
188 with kinesins below) or when altering the 'tubulin code'; the tubulin code is determined by the  
189 incorporation of different existing isotypes of  $\alpha$ - and  $\beta$ -tubulin into the MT lattice, and the addition  
190 of a range of distinct post-translational modifications (Fig.6B; Janke and Kneussel, 2010; Park and  
191 Roll-Mecak, 2018; Ti et al., 2018; Vemu et al., 2017). Some modifications influence the interaction  
192 with MT-binding proteins (e.g. poly-glutamylation attracting spastin; Valenstein and Roll-Mecak,  
193 2016), others are believed to structurally protect MTs from damage or depolymerisation, such as  
194 poly-aminations on various residues (Song et al., 2013) or acetylation of luminal lysine 40 (Fig.6B;  
195 Baas et al., 2016; Howes et al., 2014; Soppina et al., 2012; Xu et al., 2017). Notably, mutation of  
196 lysine 40 in *Drosophila*  $\alpha$ 1-tubulin caused mild but physiologically relevant *in vivo* phenotypes  
197 (Jenkins et al., 2017; Yan et al., 2018). Furthermore, the MT lumen may contain MIPs (MT inner  
198 proteins) that likely also contribute to MT stability (Ichikawa and Bui, 2018).

199 Although curvature is a key driver of MT plus end dynamics during de-/polymerisation (Brouhard  
200 and Rice, 2018; van Haren and Wittmann, 2019), MT lattices *in vitro* usually behave as rigid rods  
201 with a persistence length of 1-10 mm (as compared to  $\sim 12$   $\mu$ m measured for actin filaments;  
202 Fletcher and Mullins, 2010; Hawkins et al., 2010; Howard, 2001). However, in so-called gliding  
203 assays where MTs are moved around (minus-end-leading) on a carpet of active kinesins, they can  
204 undergo fishtailing or form micron-sized arcs or loops (Amos and Amos, 1991; Lam et al., 2016;  
205 Weiss et al., 1991). Interestingly, this phenomenon seems not to occur upon plus-end-leading

206 movement on (axonemal) dynein carpets, although collisions are far more frequent in these assays  
207 (Sumino et al., 2012).

208 On kinesin carpets, single MT loops form through motor-driven buckling upon substrate pinning or  
209 collision, favoured by high MT and/or kinesin densities or exposure to non-polar conditions (n-  
210 heptane, air; Tab.1); loops can be astonishingly stable (frequently >5 mins, as reported in Liu et  
211 al., 2011). Their structural longevity is significantly enhanced when MTs are reversibly cross-linked  
212 with biotin-streptavidin so that MTs bundle up (analogous to Fig.2C), thus forming spools  
213 composed of up to dozens of MTs; spools appear to reproduce most behaviours observed for single  
214 MTs (Tab.1): (1) the smallest inner diameters for loops and spools usually lie in the range of 1-3  
215  $\mu\text{m}$  (with diameters of curvature below  $\sim 1 \mu\text{m}$  believed to break MTs; Odde et al., 1999; Waterman-  
216 Storer and Salmon, 1997); (2) the direction of loop rotation is a function of the left- versus right-  
217 handed supertwist of MTs (Fig.6D), and spools rotate according to the supertwist of their  
218 constituent MTs (Kawamura et al., 2008; Liu et al., 2008); (3) spool diameters increase with the  
219 degree of rigidity of its MTs (Wada et al., 2015). Interestingly, like off-track MTs in axons, MTs can  
220 escape the bundled conformation of spools which can sometimes trigger spool disassembly (Hess  
221 et al., 2005; Liu et al., 2008; VanDelinder et al., 2016b).

222 Notably, key parameters promoting MT loops in gliding assays can also be found in the narrow  
223 axonal tubes: they are force-enriched due to the high density of MT-associated motor proteins, and  
224 growing/gliding MTs have a large probability to collide or get obstructed by the crowded organelle  
225 or protein content of axons (Fig.1). In line with this argument, the observed loop diameters *in vitro*  
226 roughly approximate observed diameters of disorganised MTs in axons (Tab.1, Fig.5), and even  
227 spool shapes can resemble MT conformations observed in growth cones of fly or mammalian  
228 neurons (Dent and Kalil, 2001; Hess et al., 2005; Sánchez-Soriano et al., 2010). Therefore curled  
229 MT conformations in axons might find explanations from *in vitro* work, and a number of  
230 mathematical models were put forward to describe loop or spool dynamics in gliding assays  
231 (Crenshaw et al., 2011; Gosselin et al., 2016; Luria et al., 2011; Pearce et al., 2018; Ziebert et al.,  
232 2015). Of these, two models provide mechanistic ideas for how bending through external forces  
233 can result in semi-stable loops.

234 The first model builds on known conformational changes of tubulin. Thus, tubulins in non-  
235 hydrolysed GMPCPP-MTs are 1-3% longer than hydrolysed GDP-tubulin, and taxol added after  
236 (but not during) polymerisation achieves a similar elongation (Fig.6F; Alushin et al., 2014; Amos  
237 and Löwe, 1999; Arnal and Wade, 1995; Castle et al., 2017; Hyman et al., 1995). Notably, this  
238 conformational change seems physiologically relevant, as its suppression by the T238A mutation  
239 in yeast  $\beta$ -tubulin stabilises MTs *in vivo* and causes mitotic defects (Geyer et al., 2015; Machin et  
240 al., 1995). Since virtually all gliding assays use taxol-treated (hence extended) MTs (Tab.1), the  
241 first model proposes that kinesin-mediated MT bending switches tubulins located on the concave  
242 side of the tube into the shorter conformation. This conformation can be maintained as an  
243 energetically favoured state, which might be further assisted by MT-binding proteins (Fig.6F;  
244 Ziebert et al., 2015).

245 The second model is based on work showing that kinesin-1 has a preference for convex MT  
246 surfaces and can stabilise MT curvature by extending their lattice to similar degrees as taxol  
247 (translating into a diameter of curvature of  $3.2 \mu\text{m}$ ; Peet et al., 2018). The conformational changes  
248 imposed by kinesins include compaction of tubulin that goes beyond taxol- or GMPCPP-induced  
249 effects (Krebs et al., 2004; Morikawa et al., 2015), and kinesins were found to bind cooperatively  
250 to MTs potentially causing a snowball effect (Cross, 2019; Muto et al., 2005). The model proposes  
251 therefore that binding of kinesin-1 to the convex side can drive a bias towards curvature (Pearce

252 et al., 2018). This model is particularly attractive for the non-extended GDP-MTs in axons, and it  
253 could apply to further axonal lattice-associating proteins such as tau and doublecortin, which also  
254 seem to bind differently to straight and curved MTs (Balabanian et al., 2017; Bechstedt et al., 2014;  
255 Ettlinger et al., 2016; Samsonov et al., 2004).

256 Naturally, these models are in their infancy and will have to be refined by gradually incorporating  
257 further reported findings. For example, MTs behave as elastic cylinders (comparable to a garden  
258 hose) and can undergo softening through cross-sectional flattening when strongly bent (Fig.6E;  
259 Kononova et al., 2014; Memet et al., 2018). In this same vein, conformational changes of MTs upon  
260 kinesin-1 binding were reported to soften MTs locally rather than increase their rigidity (Kabir et al.,  
261 2014). If confirmed, this would have important implications for any existing models; together with  
262 the kinesin-induced tubulin compaction (yellow asterisks in Fig.6F), it might be a mechanism to  
263 absorb energy and reduce the shear force load on MTs.

264 In conclusion, formations of axonal areas of disorganised curled MTs could be seen as processes  
265 of 'active self-organisation', for which insights from gliding assays provide attractive explanations  
266 (Lam et al., 2016): extrapolation from *in vitro* work would suggest that MT curling could be caused  
267 through an interdependent relationship between the force-enriched environment and the responses  
268 of MTs as a function of their intrinsic properties. It is now important to challenge this view and  
269 perform thorough analyses across genetic conditions and animal models, by obtaining neutral  
270 parametric descriptions of MT disorganisations observed in the different conditions (Fig.5), and of  
271 the dynamics through which they are initiated and maintained. If such studies revealed comparable  
272 parameters across different conditions, this would support the idea of a common concept behind  
273 the unusual MT behaviours in axons - as proposed by the model of local axon homeostasis. In the  
274 next section we will summarise roles of axonal MT-associated motors during axon pathology and  
275 explore whether they might be the key drivers of MT disorganisations.

276

### 277 The intricate relationship between MTs and their associated motor proteins

278 MT-associated motors comprise the minus end-directed dynein/Dynactin complex and the mostly  
279 plus-end directed proteins of the kinesin family (Hirokawa et al., 2010). Several kinesins display  
280 direct roles in MT regulation (Sturgill and Ohi, 2013). These include active MT depolymerisation  
281 (kinesin-8, -13; Walczak et al., 2013) as well as MT polymerisation (kinesin-2, -5; Chen and  
282 Hancock, 2015; Gumy et al., 2013; Guzik-Lendrum et al., 2017), MT-cross-linkage (kinesin-5, -6, -  
283 12; see section on bundling), and roles in promoting MT orientation as a feature of neuronal polarity  
284 (Tas et al., 2017; Zheng et al., 2008).

285 However, most attention is given to the active cargo and organelle transport and dynamics in axons  
286 (Fig.3A-E; see section on axonal cytoskeleton), which is driven retrogradely by dynein/Dynactin  
287 (Allan, 2011) and anterogradely by kinesins (primarily kinesin-1, -2, and -3; Hirokawa et al., 2010).  
288 The forces imposed by these dynamics and/or the size of cargoes moved, poses an obvious  
289 challenge to MT bundles (Appert-Rolland et al., 2015) and might be the main correlate of the  
290 bending forces generated by kinesin carpets in gliding assays (see previous section).

291 Clearly, there is an intricate mutual regulatory relationship and finely tuned balance between the  
292 amount of transport, and the structural properties of the transport highways (Appert-Rolland et al.,  
293 2015; Prokop, 2013). For example, MT density is higher in small calibre axons than in large axons  
294 (~15 *versus* ~150 MTs/ $\mu\text{m}^2$ ), and mathematical modelling suggests that this is required to achieve  
295 the same transport efficiency as in large axons (Wortman et al., 2014; and references within). The  
296 tubulin isotype composition of MTs, their posttranslational modifications, and the physical presence

297 of other MT-binding proteins influence motor protein dynamics ('a' in Fig.3; Balabanian et al., 2017;  
298 Monroy et al., 2018; Sirajuddin et al., 2014; Subramaniyan Parimalam et al., 2016). *Vice versa*, it  
299 has been reported that motor proteins cause damage to the MTs they walk on (Dumont et al., 2015;  
300 Peet et al., 2018; Triclin et al., 2018; VanDelinder et al., 2016a), which likely triggers maintenance  
301 responses including MT repair (Akhmanova, 2018) or potentially even replacement ('14' in Fig.3).

302 Tipping the balance in this mutual relationship can easily be imagined to cause reciprocal  
303 deficiencies in transport rate and MT bundle organisation. For example, disorganisation or partial  
304 breakage of MTs has been reported to cause pathological transport deficits (Fiala et al., 2007;  
305 Tang-Schomer et al., 2012). *Vice versa*, immunological lesioning experiments initially caused  
306 transport defects, which were then followed by MT disorganisation (Sorbara et al., 2014).  
307 Analogously, we observe severe MT disorganisation in *Drosophila* primary neurons upon loss of  
308 kinesin-1 or -3 (kinesin-1 shown in Fig.5E).

309 How loss of these kinesins can cause MT disorganisation can currently only be hypothesised. For  
310 example, it has been reported for dendrites that kinesin-1 migrates on acetylated and kinesin-3 on  
311 tyrosinated MTs (Tas et al., 2017). Provided the same is true in axons, the loss of kinesin-1 would  
312 relieve acetylated MTs, but tyrosinated MTs would still bear their full transport load - and *vice versa*.  
313 Such imbalances in transport distribution across MTs could lead to shear forces that buckle MTs  
314 and seed MT disorganisation. In the same vein, MT disorganisation was reported to be triggered  
315 by directional changes in motor traffic upon deficiency of the dynein regulator NDEL1 at the axon  
316 initial segment (Kuijpers et al., 2016). Furthermore, the movement of large cargoes likely induces  
317 dynamic rearrangements of local MT-MT crosslinking networks (see section on cross-linkage); in  
318 this scenario, violating the balanced proportion between cross-linkers and transport load may  
319 become a path to bundle aberration.

320 Alternatively, transport defects might affect MTs through biochemical routes, simply caused by the  
321 fact that the bundle-maintaining machinery runs out of supply. There would be expected distribution  
322 gaps (a) of tubulin heterodimers as building blocks, (b) of the proteins required to execute MT  
323 bundle maintenance work ('b' in Fig.3), and (c) of organelles. Organelle deficiencies can trigger  
324 systemic changes that would likely affect MT maintenance, as detailed in Box 2.

325 Functional interdependencies of organelles with MTs may explain why different types of Charcot-  
326 Marie-Tooth disease or hereditary spastic paraplegias can be caused through motor proteins as  
327 well as regulators of membranous compartments (Blackstone, 2018; Bucci et al., 2012). In  
328 agreement with this line of argumentation, MT stabilising drugs have been beneficial in animal  
329 models of neurodegeneration, including SPG4 (Box 2) and Alzheimer's disease (Brunden et al.,  
330 2014). *Vice versa*, axonal swellings induced by senile plaques in the *Tg-swAPP<sup>Pp</sup>* mouse model of  
331 Alzheimer's disease were strongly enhanced when removing one copy of the KLC1 gene (a linker  
332 required for kinesin-1 mediated transport), and this effect was found to be conserved in *Drosophila*  
333 (Stokin et al., 2005).

334 Naturally, the argumentative framework presented here is highly speculative, given the enormous  
335 complexity of the relationships between MT bundle organisation, motor protein activity and  
336 systemic factors. But we hope that these reflections will motivate experimenters to have a closer  
337 look at MTs in future studies of axon biology and pathology. More data are urgently needed, which  
338 does often not require more than analysing neuronal morphology with antisera against MTs (rather  
339 than restricting to intermediate filaments), or increasing the magnification in ongoing ultrastructural  
340 studies to have a closer look at MTs. In the following sections we will explore the mechanisms that  
341 are potentially used to prevent motor-induced MT bundle aberrations.



**Box 2.** The intricate relationship between MTs and axonal organelles

Mitochondria are the main source for ATP (Sheng, 2017), required to fuel multiple processes relevant for MT regulation (red arrows in Fig.3); these include actin assembly and dynamics (Krendel and Mooseker, 2005; Skruber et al., 2018), protein phosphorylation (Bogoyevitch and Fairlie, 2007), GTP production required for MT polymerisation and signalling (Berg et al., 2002; Hall and Lalli, 2010; Voelzmann et al., 2016a), MT severing (McNally and Roll-Mecak, 2018), and MT-motor dynamics (Hirokawa et al., 2010; although vesicular transport uses local glycolysis to generate its own ATP; yellow star in Fig.3A; Hinckelmann et al., 2016; Zala et al., 2013). Secondly, the mitochondrial surface is an important signalling platform and could be used to orchestrate MT regulation locally (not shown in Fig.3; McBride et al., 2006). Thirdly, mitochondria cooperate with ER in the regulation of intracellular free calcium (yellow cloud in Fig.3; Rieusset, 2017; Wu et al., 2017) which has direct impact on MT regulators (e.g. spectraplakins, tau, kinesins; Kapur et al., 2012; McVicker et al., 2015) or even on MTs themselves (O'Brien et al., 1997). Fourthly, mitochondria collaborate with peroxisomes in the regulation of reactive oxygen species ('ROS' in Fig.3; Fransen et al., 2017; Pascual-Ahuir et al., 2017), which have known effects on MT regulation (Wilson and Gonzalez-Billault, 2015).

Furthermore, aberrations of axonal transport or MT-bundle organisation can cause mitochondrial damage or dysregulation of the mitochondria-peroxisome system, both leading to oxidative stress as a major path to axon pathology (Fiala et al., 2007; Liu et al., 2017; Pascual-Ahuir et al., 2017). Such causative relationships between MTs and oxidative stress can be experimentally demonstrated: for example the MT-stabilising drug epothilone B rescues oxidative stress caused by peroxisome transport deficiencies in a human iPSC model of SPG4 (spastin-linked spastic paraplegia 4; Wali et al., 2016).

Similar interdependencies would apply to other important organelles or membrane compartments that likewise depend on MT-binding motor proteins to undergo meaningful dynamics (Fig.3D); of particular importance are the ER with its multiple roles in calcium homeostasis, protein synthesis and lipidogenesis (Gonzalez and Couve, 2014), or the endolysosomal system required for proteostasis (Winckler et al., 2018). For example, drug-induced inhibition of the proteasome-ubiquitination system has been shown to induce alteration in MTs and axonal transport (Staff et al., 2013).

342

343

344 MT polymerisation as a fundamental requirement for bundle maintenance

345 As mentioned before, the numbers of axonal MTs have to be well adapted to the transport load  
346 (Wortman et al., 2014), and this requires a well-regulated machinery of MT polymerisation and  
347 disassembly (blue stippled arrows in Fig.3). On the one hand, MT volume has to be generated *de*  
348 *novo* during axon growth ('8' in Fig.3), and thereafter this volume has to be maintained at steady-  
349 state and prevented from MT senescence, which requires MT repair but likely also MT turn-over  
350 ('14' in Fig.1; Akhmanova, 2018; Triclin et al., 2018; Voelzmann et al., 2016a).

351 As we detailed in a previous review (Voelzmann et al., 2016a), the machinery of MT de-  
352 /polymerisation requires three sub-machineries: (1) dynamic protein complexes at the MT plus end  
353 (blue balls, 'Eb1' in Fig.3); (2) the supply of  $\alpha/\beta$ -tubulin heterodimers as building blocks which  
354 occurs through a complex regulatory network in close co-regulation with MT dynamics ('c' in Fig.3;  
355 Gasic and Mitchison, 2018; Preitner et al., 2014); (3) proteins which bind or post-translationally  
356 modify the MT lattice, for example through stabilising MTs against depolymerisation ('7' in Fig.3).

357 Such complex machinery has to be orchestrated in tune with the wider systemic context of axons.  
358 This is illustrated by our recent work in *Drosophila* neurons, showing that loss of cortical actin rings  
359 in the axon shaft (Fig.1) causes a reduction in MT polymerisation speed, eventually affecting MT  
360 bundle integrity; simultaneous application of MT-destabilising drugs or removal of the MT-  
361 stabilising spectraplakin Short stop (Shot) exacerbated these effects, frequently even eliminating  
362 entire axons (Qu et al., 2017). Similar co-dependencies are suggested by other reports: (1) parallel  
363 loss of spectrin and tau causes axonal MT loss in *C. elegans* (Krieg et al., 2017); (2) axon-  
364 shortening induced by the MT-stabiliser taxol can be ameliorated through co-application of actin-  
365 destabilising drugs (in both chick and *Drosophila* neurons; Letourneau et al., 1987; Sánchez-  
366 Soriano et al., 2010, or *vice versa* Datar et al., 2019); (3) application of actin-destabilising drugs to  
367 PC12 cells changes the tubulin to microtubule ratio (Dennerll et al., 1988). Such co-dependencies  
368 of MT polymerisation on MT stabilisation and actin networks are currently best explained by  
369 biomechanical models as detailed in Box 3.

### Box 3. Biomechanical models of axon growth

The regulation of axonal growth dynamics has been explained with the concept of tensegrity (tensional integrity), an architectural principle based on structural nets that are under continuous tension whilst containing isolated components under compression (Buckminster Fuller, 1961; Ingber and Folkman, 1989). In axons, “*actin is under tension supported in part by microtubules under compression*” (Heidemann and Buxbaum, 1990). Tension is provided by pulling acto-myosin networks in growth cones (Fass and Odde, 2003; Heidemann et al., 1990), the rigid but contractile properties of cortical actin in the axon shaft (Fan et al., 2017; Heidemann and Buxbaum, 1990; Krieg et al., 2017; Xu et al., 2013; Fig.1), and the stiff nature of cross-linked MT bundles is well suited to oppose compressive forces up to a certain threshold (Fig.2).

In such a balanced system, destabilisation of MTs increases tension at the expense of compression, and a decrease in acto-myosin networks or contractility reduces tension in favour of compression; force-generating MT polymerisation is one component responding to and regulating this balance with ultimate impact on axon length (Buxbaum and Heidemann, 1988; Dennerll et al., 1988; Heidemann et al., 1990; Letourneau et al., 1987).

In further agreement with this hypothesis, pulling the tips of axons enhances their growth rate (Bray, 1984; Lamoureux et al., 2010; Zheng et al., 1991); even single MTs polymerise faster when being pulled on *in vitro* (Brouhard and Rice, 2018). The necessary translation of the mechanical stimulus into changes of MT polymerisation rates might therefore occur at the level of MT polymerases (Brouhard and Rice, 2018) and/or be mediated by mechano-sensitive calcium channels in the axonal membrane (Franze et al., 2009; He et al., 2019; Heidemann and Buxbaum, 1990).

370

371

### 372 Cortical guidance and elimination of polymerising MTs

373 Whilst well-equilibrated MT polymerisation is a requirement for axonal maintenance, it also poses  
374 a risk, in that extending MTs can accidentally project out of the bundle and seed MT disorganisation  
375 ('4' in Fig.3), potentially similar to loop formation upon MT obstruction in gliding assays (see section  
376 on curling). A key factor preventing this from happening is Eb1 (Alves-Silva et al., 2012; Figs.3 and  
377 5B). Eb1 directly binds at extending MT plus ends where it promotes polymerisation (Zanic et al.,  
378 2013) and serves as a scaffold for many other proteins (Gupta et al., 2014).

379 One mechanism through which Eb1 maintains extending MTs in bundled configuration, is MT  
380 guidance mediated by Short stop (Shot). Shot is a well-conserved spectraplaklin, able to cross-link  
381 cortical actin, MTs and Eb1 ('5' in Fig.3), thus guiding polymerising MTs in parallel to the axonal  
382 surface and laying them out into parallel bundles (Alves-Silva et al., 2012). Similar to Eb1  
383 deficiency, also loss of Shot causes severe MT disorganisation in axons - and the same is true for  
384 its two mammalian homologues ACF7 and dystonin (Bernier and Kothary, 1998; Dalpe et al., 1998;  
385 Sánchez-Soriano et al., 2009; Voelzmann et al., 2017) - of which the latter links to the axonopathy  
386 HSN6 (type 6 hereditary sensory and autonomic neuropathy; Edvardson et al., 2012).

387 Such cortical guidance is complemented by at least one control mechanism: if MTs (accidentally)  
388 leave their bundled arrangements and extend towards the cortex, they get eliminated by Efa6 ('4'  
389 in Fig.3), a cortical collapse factor that associates with the axonal membrane via its C-terminal  
390 plekstrin homology domain; consistent with the model of local axon homeostasis, loss of Efa6  
391 causes three neuronal phenotypes, in culture as well as in fly brains: significant MT disorganisation  
392 (Fig.5D), longer axons, and more axonal branches (Qu et al., 2018); all three phenotypes are based  
393 on morphogenetic processes to which 'off-track' MTs can contribute (curved arrows in Fig.1). Our  
394 model would predict that mutant phenotypes caused by loss of Shot and Efa6 should enhance  
395 each other because they are caused through complementary mechanisms of MT bundle regulation.  
396 Accordingly, we found a clear increase in MT disorganisation when removing both Shot and Efa6  
397 from the same neurons (Qu et al., 2018). We propose therefore that, Shot and Eb1 keep MTs away  
398 from the membrane, whereas Efa6 acts as a finely tuned quality control factor eliminating accidental  
399 off-track MTs, whilst still permitting enough MTs to get through to perform intended functions in  
400 axon growth and branching.

401 Interestingly, the cortical collapse function of Efa6 is not conserved in vertebrates (Qu et al., 2018).  
402 But the concepts derived from Efa6 studies still appears relevant, because loss of the unrelated  
403 neuronal cortical collapse factor KIF21A causes analogous phenotypes in mammalian neurons:  
404 KIF21A mutations linked to the neurodevelopmental disorder CFEOM1 (type 1 congenital fibrosis  
405 of the extraocular muscles) affect axon growth and axonal branching just like Efa6 (Qu et al., 2018;  
406 van der Vaart et al., 2013), and we would also predict potential increases in MT disorganisation (no  
407 data available).

408 Guidance along cortical actin seems not the only mechanism through which Eb1 and Shot keep  
409 MTs on track. This is illustrated by the simple fact that MT disorganisation observed upon loss of  
410 Shot or Eb1 (Fig.5B, E) does not occur when removing actin from axon shafts (Alves-Silva et al.,  
411 2012; Qu et al., 2017; Sánchez-Soriano et al., 2010). This suggests that both factors perform  
412 additional, actin-independent functions or interactions to promote MT bundles.

413 For example, the unusual Shot-PH isoform, which is highly enriched in the nervous system and  
414 harbours a plakin repeat region (PRR; conserved in mammalian spectraplakins), is a likely  
415 candidate for such roles, but still has to be investigated ('11' in Fig.3; Hahn et al., 2016; Voelzmann  
416 et al., 2017). Eb1 has a long list of protein interactors besides Shot (Gupta et al., 2014), and some  
417 of them might associate with MTs and guide extending plus ends along pre-existing bundles ('9' in  
418 Fig.3); for example, they could be proteins, such as APC-like or GAS2-LIKE family members  
419 (Pickled eggs/Pigs in *Drosophila*), known to bind both MTs and Eb1 in *Drosophila* and mammals  
420 (Beaven et al., 2015; Pines et al., 2010; Stroud et al., 2014).

421

#### 422 Role of severing proteins and MT-destabilising kinesins

423 As indicated in the previous section, MT disorganisation, axon growth and collateral axon branch

424 formation are driven by MTs leaving the bundled conformation (curved arrows in Fig.1; Kalil and  
425 Dent, 2014; Tint et al., 2009; Tymanskyj et al., 2017). Consequently, MT-disassembling factors  
426 should have the principal potential to negatively regulate either process. This is true for cortical MT  
427 collapse factors (*Drosophila* Efa6, mammalian Kif21A; see previous section) which can down-  
428 regulate axonal growth, branching and MT disorganisation. Also the MT-depolymerising kinesin-13  
429 family member Kif2A (Homma et al., 2003) and MT severing proteins (spastin, katanin and fidgetin)  
430 were reported to inhibit neurite growth and/or branching (Leo et al., 2015; Mao et al., 2014; Tao et  
431 al., 2016). Even more, MT disorganisation is observed upon the losses of *Drosophila* katanin (our  
432 unpublished results) or mammalian spastin (Denton et al., 2014; Fassier et al., 2013; Havlicek et  
433 al., 2014; Tarrade et al., 2006).

434 However, other studies of spastin, katanin and fidgetin led to contradictory findings, describing  
435 them as promoters rather than inhibitors of neurite growth and branching (Ahmad et al., 1999;  
436 Butler et al., 2010; Havlicek et al., 2014; Karabay et al., 2004; Riano et al., 2009; Stewart et al.,  
437 2012; Stone et al., 2012; Wood et al., 2006; Yu et al., 2008). Such stark, potentially context-  
438 dependent deviations seem to reflect the complex regulation of severing proteins. Thus, spastin,  
439 katanin and fidgetin are all members of the superfamily of AAA proteins (ATPases associated with  
440 diverse cellular activities; McNally and Roll-Mecak, 2018; Sharp and Ross, 2012; Zhang et al.,  
441 2007), but their severing activity is differentially regulated through their individual responses to (a)  
442 posttranslational MT modifications (in particular acetylation and poly-glutamylation; Bailey et al.,  
443 2015; Lacroix et al., 2010; Leo et al., 2015; Shin et al., 2019; Sudo and Baas, 2010; Valenstein and  
444 Roll-Mecak, 2016), (b) antagonistic MT shaft-binding proteins such as tau (Qiang et al., 2018;  
445 Qiang et al., 2006; Yu et al., 2008), or (c) spatial recruitment through specifically localised proteins  
446 such as CAMSAP (Jiang et al., 2018).

447 Through this precise spatiotemporal regulation of their activity, severing proteins are believed to  
448 either eliminate MTs or to break them up into stable fragments that serve as seeds for MT  
449 amplification (Baas et al., 2016; McNally and Roll-Mecak, 2018; Vemu et al., 2018). These  
450 properties of severing proteins could be used in different ways to prevent MT disorganisation: First,  
451 by targeting disorganised MTs for elimination, MT severing proteins could serve as quality control  
452 factors ('6' in Fig.3) that complement roles of cortical collapse factors ('4' in Fig.3). In agreement  
453 with this idea, katanin in plant cells was reported to localise and sever preferentially at MT cross-  
454 points, which can be used to take out non-aligned MTs (McNally and Roll-Mecak, 2018).

455 Second, MT shortening functions of katanin are required at MT minus ends. Thus, in both mammals  
456 and *Drosophila*, the minus-end capper CAMSAP/Patronin protects against MT disassembly, and  
457 recruits katanin to counterbalance against uncontrolled minus-end extension ('13' in Fig.3; Goodwin  
458 and Vale, 2010; Jiang et al., 2018; Nashchekin et al., 2016); such uncontrolled extension may  
459 cause MTs to go off-track or to buckle through extra forces produced.

460 Third, MT elimination functions could prevent MT bundle senescence. Thus, MTs suffer from  
461 damage through tear-and-wear (Dumont et al., 2015; Peet et al., 2018; Triclin et al., 2018;  
462 VanDelinder et al., 2016a), which might cause bundle aberration by abrogating interactions with  
463 MT-binding proteins (red cross at '16' in Fig.3). On the one hand, this is addressed by immediate  
464 lattice repair involving katanin or spastin (Davis et al., 2002; Diaz-Valencia et al., 2011; Gasic and  
465 Mitchison, 2018; Triclin et al., 2018; Vemu et al., 2018). On the other hand, spastin and katanin  
466 could prevent senescence through selective elimination of aged MTs (as similarly suggested for  
467 kinesin-8 or -13; Gardner et al., 2011), followed by compensatory polymerisation ('14' in Fig.3).  
468 Such a mechanism might explain why spastin deficiency in the *Sp<sup>d</sup>* mouse model causes a drop in  
469 MT polymerisation whilst triggering MT disorganisation (Fassier et al., 2013).

470 However, the MT phenotypes observed in the *Sp<sup>4</sup>* mouse model could likewise be explained  
471 through the opposite role of spastin in MT multiplication, rather than elimination. Thus, without  
472 spastin, MT numbers might gradually decline and cause transport interruptions which, in turn,  
473 would affect MT bundle organisation and eventually cause systemic pathology (see section on  
474 motor proteins; Wali et al., 2018; Wali et al., 2016). In this way, not failing MT turn-over (causing  
475 senescence) but impaired homeostasis of MT numbers (causing transport defects) might lie at the  
476 root of the problem; curiously, axon swellings in this model were reduced with low doses of MT-  
477 stabilising or -destabilising drugs (Fassier et al., 2013), not favouring either of the explanations.

478 Understanding spastin is important because it is by far the most prominent factor linking to spastic  
479 paraplegias worldwide (Koh et al., 2018; Schüle et al., 2016), and axonal swellings are a hallmark  
480 of the disease (Blackstone, 2018; Zempel and Mandelkow, 2015). Most SPG4-linked mutations lie  
481 within the AAA-ATPase domain (Shoukier et al., 2009), suggesting that MT severing is key to the  
482 disease pathology. However, point mutations might generate versions of spastin, which either act  
483 as dominant negative alleles (forming dysfunctional complexes that titrate out other spastin-  
484 interacting factors), or acquire gain-of-function qualities by diffusing away to perform very different  
485 roles. One such MT-independent role of spastin is the isoform-specific regulation of the  
486 endoplasmic reticulum ('15' in Fig.3), including its shape, interaction with the endosome or  
487 production of lipid droplets (Allison et al., 2017; Papadopoulos et al., 2015; Park et al., 2010;  
488 Solowska and Baas, 2015). Therefore, it is difficult to exclude that at least part of those mutations  
489 causes systemic rather than MT aberrations as the initial triggers of axon decay ('3' in Fig.4).

490

#### 491 Structural support through MT-MT cross-linkage

492 MT-MT cross-linkage ('12' in Fig.3) is likely the oldest mechanistic concept put forward by  
493 neurobiologists to explain MT bundles (Lee and Brandt, 1992) and appears an obvious means of  
494 suppressing MT disorganisation. In physical terms, axons have been described as a “*stiff spring in  
495 series with a viscoelastic (Voight) element composed of a less stiff spring in parallel with a fluid  
496 dashpot*” (Heidemann et al., 1990), meaning that axons are under rest tension and combine elastic  
497 and viscous properties. A central structural component underpinning such properties is likely  
498 provided by networks of MT-MT cross-linkers (Fig.2), where each linker is able to detach upon  
499 super-threshold pull or compression, and re-attach thereafter (slip-bonds). Physical cross-linking  
500 strands between axonal MTs were observed decades ago (Hirokawa, 1982, 1986), and  
501 mathematical models support MT-MT cross-linkage as an important structural feature of axons  
502 (e.g. de Rooij and Kuhl, 2018; Lazarus et al., 2015; Li et al., 2018; Peter and Mofrad, 2012).

503 However, the underlying genetic factors remain surprisingly controversial to this day - to a degree  
504 that one cannot even fully exclude a model view where linkers do not attach MTs but rather  
505 separate them, whilst the corset of contractile cortical actin rings (Fig.1) constrains them into a  
506 dense bundle (Fan et al., 2017). This uncertainty is partly due to the surprisingly low number of  
507 publications reporting structural bundle defects upon loss of putative MT-MT cross-linkers (see  
508 below). Further doubt comes from the recognition that MT bundling observed upon neuronal linker  
509 expression in non-neuronal cells, might represent artefacts, because MT bundling can even be  
510 achieved through expression of isolated MT-binding domains, or the application of the MT-  
511 stabilising drug taxol which causes bundles with ultrastructural cross-bridges that are  
512 indistinguishable from those induced by tau or MAP2 (Chapin et al., 1991; DeBonis et al., 2015;  
513 Goriounov et al., 2003; Kader et al., 2017; Lee and Brandt, 1992). Another example is dynamin,  
514 which is linked to Charcot-Marie-Tooth disease, has been shown to bundle MTs *in vitro*, but *in vivo*

515 seems to bind membranes instead (Scaife and Margolis, 1990; Shpetner and Vallee, 1989;  
516 Züchner et al., 2005).

517 For example, MTL1 and MAP1B (Futsch in *Drosophila*) appear ideal cross-linkers, because they  
518 both possess an N- and a C-terminal MT-binding domain, and were shown to induce bundles upon  
519 expression in non-neuronal cells (although MAP1B appears a weak bundler; Kader et al., 2017;  
520 Penazzi et al., 2016; Satake et al., 2017). However, there are only isolated reports that axonal  
521 bundle defects occur in their absence (Bettencourt da Cruz et al., 2005; Satake et al., 2017).  
522 Instead, the long history of MAP1B research is mostly dedicated to aspects of axon development  
523 (Villaruel-Campos and Gonzalez-Billault, 2014). Its fly homologue Futsch promotes MT spools at  
524 synaptic terminals (Roos et al., 2000), but its axonal defects comprise merely growth aberrations  
525 but no MT disorganisation (Hummel et al., 2000; our unpublished results). Therefore, existing data  
526 for MAP1B/Futsch only vaguely support roles in axonal MT bundling.

527 The other conserved linker candidate tau, has only one central MT-binding region and achieves  
528 physical MT-MT linkage *in vitro* through N-terminal dimerisation (Chung et al., 2016; Méphon-  
529 Gaspard et al., 2016; Rosenberg et al., 2008). However, its dwell time on MTs seems very short  
530 (Janning et al., 2014; Samsonov et al., 2004), and reported tau-deficient phenotypes hardly ever  
531 comprise bundle aberration, but developmental neuronal defects instead (Krieg et al., 2017;  
532 Penazzi et al., 2016).

533 Pinpointing MT-MT cross-linkage through tau is further complicated by the fact that normal tau has  
534 been associated with a whole array of further molecular functions relevant for MT dynamics. For  
535 example, tau can protect MTs from severing by katanin (Qiang et al., 2006), bind tubulin hetero-  
536 dimers (Shin et al., 2018), switch between bundled and single MT states (Prezel et al., 2018), cross-  
537 link MTs with actin or the cortex (Biswas and Kalil, 2018; Cabrales Fontela et al., 2017; Maas et  
538 al., 2000), stabilise MTs during axon initiation (Brandt, 1998), maintain labile domains along MT  
539 shafts (Qiang et al., 2018), regulate End-binding proteins (Sayas et al., 2015), compete with  
540 kinesins (Trinczek et al., 1999), and promote MT nucleation and polymerisation (Penazzi et al.,  
541 2016). A similarly broad pleiotropy has been reported for MAP1B (Villaruel-Campos and Gonzalez-  
542 Billault, 2014).

543 A further complicating factor for pinpointing relevant MT-MT cross-linking activities are the obvious  
544 functional redundancies in the system. Thus, *MAP1B* and *tau* have enhanced growth phenotypes  
545 when both mutant conditions are combined in double-mutant mouse neurons (Takei et al., 2000).  
546 Complementary to this, co-expression of Futsch and Tau causes enhanced phenotypes in the  
547 *Drosophila* CNS (Hummel et al., 2000). Such functional redundancy likely extends to further  
548 potential cross-linkers. For example, Kinesin-5 (KIF11), kinesin-6 (KIF23, Pavarotti in *Drosophila*)  
549 and kinesin-12 (KIF15) are best known for their ability to slide anti-parallel MTs in the mitotic spindle  
550 (Baas, 1999); however, in axons where MTs are arranged in parallel these kinesins seem to inhibit  
551 sliding (Dong et al., 2019; Lin et al., 2012; Liu et al., 2010; Lu et al., 2013; Myers and Baas, 2007;  
552 Nadar et al., 2012) - and this can be considered a form of MT-MT cross-linkage. Notably, we  
553 observe that loss of *Drosophila* Pavarotti causes axonal MT disorganisation (our unpublished data),  
554 providing a readout for studying its potential linker functions. By incorporating redundancies of  
555 linker candidates into experimental approaches, there might be new opportunities to decipher the  
556 true molecular nature of MT-MT cross-linkage in axons.

557

558

559 Are MT bundles anchored to the axonal cortex?

560 Apart from cross-linkage between MTs, another bundle-stabilising aspect could be anchorage to  
561 the wall of the axonal tube. For example, polymerisation occurs all along axon shafts, and it has  
562 been proposed from studies in developing vertebrate and *Drosophila* neurons, that the MT mass  
563 generated in the axonal shaft during axon growth gradually shifts anterogradely (Miller and Sheetz,  
564 2006; O'Toole et al., 2008; Reinsch et al., 1991; Roossien et al., 2013). Contributing forces were  
565 suggested to be generated by pulling forces in the rear of growth cones (O'Toole et al., 2015), by  
566 MT polymerisation, by thermal motion of MT-MT cross-linkers (Lansky et al., 2015), by kinesins  
567 actively sliding MTs along other MTs ('B' in Fig.3; Lu and Gelfand, 2017) or by dyneins sliding MTs  
568 along cortical F-actin ('10' in Fig.3; Ahmad et al., 2006; He et al., 2005; Myers et al., 2006; Roossien  
569 et al., 2014).

570 Potential MT sliding along cortical actin would be a form of tethering MT bundles to the axonal  
571 surface and raises the fundamental question as to whether MT bundles are free-flowing within the  
572 axonal tube, or anchored to it. Potential anchorage is suggested by observed co-drift of the  
573 axolemma with the axon core (Lamoureux et al., 2010; Popov et al., 1993; Zheng et al., 1991).  
574 Such anchorage would not have to be static, but might involve an interface of slip-bonds, as  
575 similarly suggested for back-flowing actin networks at stable focal adhesion sites (Case and  
576 Waterman, 2015). Furthermore, anchorage of MTs would not have to be restricted to the rigid  
577 cortical actin networks (Fig.1; '2' in Fig.3; Xu, 2013 #6895), but could also involve links to adhesion  
578 factors ('3' in Fig.3), thus forming mechano-sensing modules (Yap et al., 2018) that can respond to  
579 local shear forces generated between MT bundles and the axonal environment (Fig.1). Such  
580 adhesion-mediated local mechano-sensing could explain local regulation phenomena: for example,  
581 net rates of fast mitochondrial transport are regulated in a way that they gradually decrease towards  
582 distal axon segments, indirectly proportional to the slow local MT drift rate along the axon (which  
583 increased towards the distal end; Miller and Sheetz, 2006). This proximo-distal differences of fast  
584 mitochondrial transport could therefore be determined by mechano-sensing as a function of the  
585 local MT drift rate relative to the outer axonal environment.

586 Apart from dynein (see above), spectraplakins are candidate anchoring factors. This is suggested  
587 by *Drosophila* neurons lacking the spectraplakin Shot and treated with the MT-stabilising drug taxol:  
588 in these neurons, axonal MTs shifted distally, often leaving tubulin-free zones in the proximal axon  
589 shaft (Voelzmann et al., 2017). However, this same effect was not observed when applying taxol  
590 whilst also removing actin (Sánchez-Soriano et al., 2010), suggesting that Shot does more than  
591 simply anchoring to cortical actin in this experimental context.

592 This conclusion is in agreement with the breadth of axonal functions proposed for spectraplakins,  
593 making them the most conspicuous regulators of the axonal cytoskeleton in any species  
594 investigated so far (Voelzmann et al., 2017). For example, the role of Shot in preventing MT shift  
595 may involve a combination of molecular functions including MT-MT cross-linkage ('11' in Fig.3),  
596 actin-MT cross-linkage ('2' and '5' in Fig.3), as well as two other potential anchoring mechanisms:  
597 Firstly, Shot is able to compartmentalise the localisation of the cell adhesion molecule Fasciclin 2  
598 (Bottenberg et al., 2009; Prokop et al., 1998), suggesting that it might be able to link to membrane-  
599 associated proteins like its mammalian homologue dystonin ('3' in Fig.3; Voelzmann et al., 2017).  
600 Secondly, work on non-neuronal cells of fly and mammals revealed that spectraplakins can interact  
601 with the MT minus end-stabilising factor CAMSAP/Patronin (a factor known to be relevant for  
602 neuronal morphology; Yau et al., 2014), thus anchoring MT minus ends to the cell cortex ('1' in  
603 Fig.3; Nashchekin et al., 2016; Ning et al., 2016; Noordstra et al., 2016).

604 Taken together, axonal MT bundles are likely tethered to the cortex, with dynein and/or

605 spectraplakins as potential anchors. But further factors have to be considered. For example,  
606 several MT lattice-binding and/or -cross-linking proteins were similarly reported to bind to actin or  
607 to the cortex, and these include tau, MAP1B, APC and dynamin (Biswas and Kalil, 2018; Blanchoin  
608 and Michelot, 2012; Brandt et al., 1995; Elie et al., 2015; Gu et al., 2010; Maas et al., 2000; Mohan  
609 and John, 2015; Villarroel-Campos and Gonzalez-Billault, 2014). They could cross-link MTs to actin  
610 at the cortex ('2' in Fig.3) or to central longitudinal actin trails (Fig.1; Leterrier et al., 2017), thus  
611 further contributing to the intricate cross-linking networks expected to stabilise MT bundles. Cross-  
612 linking MT bundles internally and anchoring them to the axonal tube would constitute a firm  
613 structure, able to prevent MT buckling and bundle deformation caused by the enormous forces  
614 imposed by axonal cargo transport.

615

### 616 Conclusions and future perspectives

617 Here we have presented a conceptual view by describing a functional interactome that integrates  
618 the enormous complexity of cross-regulatory networks acting at the local level in axons. We  
619 propose that there has to be a fine balance between damaging effects inflicted by life-sustaining  
620 'associated' motor movements ('A-E' in Fig.3) and the activities that maintain the highways required  
621 for this movement (MT-'taming' mechanisms; '1-15' in Fig.3), fine-tuned through a number of cross-  
622 regulatory mechanisms ('a-e' in Fig.3).

623 Our model integrates a broad range of findings from the literature and speculative conclusions  
624 drawn. But its original foundations are derived from our own work in *Drosophila* neurons as one  
625 consistent model. Like other genetic invertebrate models, *Drosophila* provides a cost-effective and  
626 fast system to unravel the functional overlap and interface of different genetic factors - ideal to  
627 dissect complex machinery and deliver data that then often apply to axons of higher animals  
628 (Beaven et al., 2015; Prokop, 2018; Prokop et al., 2013).

629 This strategy offers one feasible path towards solving the daunting task of disentangling the  
630 enormous regulatory complexity; the model of local axon homeostasis could provide the basis on  
631 which to formulate helpful working hypotheses. A good starting point might be to break down the  
632 local axon homeostasis machinery into classifiable sub-machineries, such as those discussed in  
633 the different sections of this review.

634 In our view, we urgently require a shift away from prioritising molecular mechanisms and should  
635 rather dedicate to exploring their integration into wider regulatory networks - a type of research that  
636 is too often disqualified as 'incremental science' (Cohen, 2017). In our opinion, this would be a  
637 much needed paradigm shift with a realistic chance of providing us with far better understanding of  
638 axonal cell biology at the organisational level at which axonopathies become manifest.

639 Such an integrative approach has to take into consideration that knowledge derived from non-  
640 neuronal cells might not apply in neurons (Beaven et al., 2015). Furthermore, the interactome  
641 shown in Fig.3 makes clear that we will need quantitative approaches: we know increasingly well  
642 how factors bind to MTs and partly understand how they might compete with each other. But how  
643 crowded can a single MT be, how many molecules are there at any time in its surrounding, and  
644 how much dynamic exchange is taking place? Computational modelling will be an unavoidable  
645 means to make sense of existing data and make reasonable predictions to inform experimentation  
646 (Cohen, 2004; Gunawardena, 2014).

647 Integrated understanding of axon biology will also improve our knowledge of the next higher level  
648 of complexity, i.e. the mechanisms that orchestrate axon homeostasis, and can help to maintain



649 balance even during phases of change (when switching from growth to differentiation, or during  
650 stress, injury, regeneration) - or tip the balance inducing degeneration. Obviously, signalling  
651 networks or dynamic changes of systemic factors such as second messengers or the 'tubulin code'  
652 will be key players to this end (Baas et al., 2016; Park and Roll-Mecak, 2018; Schelski and Bradke,  
653 2017; Wilson and Gonzalez-Billault, 2015) - and glial cells will likely act as important external  
654 influencers of such processes (Pan and Chan, 2017).

655 Finally, MTs have been recognised as promising therapeutic targets (Baas and Ahmad, 2013; Eira  
656 et al., 2016; Zempel and Mandelkow, 2015), and urgently needed advance on this translational  
657 path will be facilitated by a better understanding of the axonal MT homeostasis system.

658

## 659 Acknowledgements

660 Work underpinning this article was made possible through support by the BBSRC to A.P  
661 (BB/I002448/1, BB/P020151/1, BB/L000717/1, BB/M007553/1), by parents to Y.-T.L., by the  
662 Leverhulme Trust to I.H. (ECF-2017-247). The Manchester Bioimaging Facility microscopes used  
663 in this study were purchased with grants from the BBSRC, The Wellcome Trust and The University  
664 of Manchester Strategic Fund. The Fly Facility has been supported by funds from The University  
665 of Manchester and the Wellcome Trust (087742/Z/08/Z). We thank Anthony Brown for introducing  
666 A.P. to the arguments that support a role of intermediate filaments in axon diameter.

667

## 668 References

- 669 Adalbert, R., Coleman, M. P. (2012). Axon pathology in age-related neurodegenerative disorders.  
670 *Neuropathol Appl Neurobiol* 39, 90–108 -- <http://www.ncbi.nlm.nih.gov/pubmed/23046254>
- 671 Adalbert, R., Nogradi, A., Babetto, E., Janeckova, L., Walker, S. A., Kerschensteiner, M., Misgeld, T.,  
672 Coleman, M. P. (2009). Severely dystrophic axons at amyloid plaques remain continuous and  
673 connected to viable cell bodies. *Brain* 132, 402-16 -- <http://www.ncbi.nlm.nih.gov/pubmed/19059977>
- 674 Aguzzi, A. (2019). 'Forward genetics' and the causes of ALS. *Nature Reviews Molecular Cell Biology* 20,  
675 67-67 -- <https://doi.org/10.1038/s41580-018-0062-6>
- 676 Ahmad, F. J., He, Y., Myers, K. A., Hasaka, T. P., Francis, F., Black, M. M., Baas, P. W. (2006). Effects of  
677 dynactin disruption and dynein depletion on axonal microtubules. *Traffic* 7, 524-37 --  
678 [http://www.ncbi.nlm.nih.gov/entrez/query.fcgi?cmd=Retrieve&db=PubMed&dopt=Citation&list\\_uids=16](http://www.ncbi.nlm.nih.gov/entrez/query.fcgi?cmd=Retrieve&db=PubMed&dopt=Citation&list_uids=16643276)  
679 [643276](http://www.ncbi.nlm.nih.gov/entrez/query.fcgi?cmd=Retrieve&db=PubMed&dopt=Citation&list_uids=16643276)
- 680 Ahmad, F. J., Yu, W., McNally, F. J., Baas, P. W. (1999). An essential role for katanin in severing  
681 microtubules in the neuron. *J Cell Biol* 145, 305-15 --  
682 [http://www.ncbi.nlm.nih.gov/entrez/query.fcgi?cmd=Retrieve&db=PubMed&dopt=Citation&list\\_uids=10](http://www.ncbi.nlm.nih.gov/entrez/query.fcgi?cmd=Retrieve&db=PubMed&dopt=Citation&list_uids=10209026)  
683 [209026](http://www.ncbi.nlm.nih.gov/entrez/query.fcgi?cmd=Retrieve&db=PubMed&dopt=Citation&list_uids=10209026)
- 684 Akhmanova, A. (2018). Strengthening Microtubules by Cuts that Heal. *Dev Cell* 47, 400-401 --  
685 <http://www.sciencedirect.com/science/article/pii/S1534580718309201>
- 686 Al-Bassam, J. (2017). Revisiting the tubulin cofactors and Arl2 in the regulation of soluble  $\alpha\beta$ -tubulin pools  
687 and their effect on microtubule dynamics. *Molecular Biology of the Cell* 28, 359-363 --  
688 <http://www.molbiolcell.org/content/28/3/359.abstract>
- 689 Allan, V. J. (2011). Cytoplasmic dynein. *Biochem Soc Trans* 39, 1169-78 --  
690 <http://www.ncbi.nlm.nih.gov/pubmed/21936784>
- 691 Allen, M. J., Godenschwege, T. A., Tanouye, M. A., Phelan, P. (2006). Making an escape: development  
692 and function of the *Drosophila* giant fibre system. *Semin Cell Dev Biol* 17, 31-41 --  
693 [http://www.ncbi.nlm.nih.gov/entrez/query.fcgi?cmd=Retrieve&db=PubMed&dopt=Citation&list\\_uids=16](http://www.ncbi.nlm.nih.gov/entrez/query.fcgi?cmd=Retrieve&db=PubMed&dopt=Citation&list_uids=16378740)  
694 [378740](http://www.ncbi.nlm.nih.gov/entrez/query.fcgi?cmd=Retrieve&db=PubMed&dopt=Citation&list_uids=16378740)
- 695 Allison, R., Edgar, J. R., Pearson, G., Rizo, T., Newton, T., Gunther, S., Berner, F., Hague, J., Connell, J.  
696 W., Winkler, J., Lippincott-Schwartz, J., Beetz, C., Winner, B., Reid, E. (2017). Defects in ER-

- 697 endosome contacts impact lysosome function in hereditary spastic paraplegia. *J Cell Biol* 216, 1337-  
698 1355 -- <http://www.ncbi.nlm.nih.gov/pubmed/28389476>
- 699 Alushin, G. M., Lander, G. C., Kellogg, E. H., Zhang, R., Baker, D., Nogales, E. (2014). High-resolution  
700 microtubule structures reveal the structural transitions in alphabeta-tubulin upon GTP hydrolysis. *Cell*  
701 157, 1117-29 -- <http://www.ncbi.nlm.nih.gov/pubmed/24855948>
- 702 Alves-Silva, J., Sánchez-Soriano, N., Beaven, R., Klein, M., Parkin, J., Millard, T., Bellen, H., Venken, K. J.  
703 T., Ballestrem, C., Kammerer, R. A., Prokop, A. (2012). Spectraplakins promote microtubule-mediated  
704 axonal growth by functioning as structural microtubule-associated proteins and EB1-dependent +TIPs  
705 (Tip Interacting Proteins). *J. Neurosci* 32, 9143-58 -- <http://www.jneurosci.org/content/32/27/9143.full>
- 706 Amos, L., Amos, W. (1991). The bending of sliding microtubules imaged by confocal light microscopy and  
707 negative stain electron microscopy. *J Cell Sci* 1991, 95-101 --  
708 [http://jcs.biologists.org/content/joces/1991/Supplement\\_14/95.full.pdf](http://jcs.biologists.org/content/joces/1991/Supplement_14/95.full.pdf)
- 709 Amos, L. A., Löwe, J. (1999). How taxol stabilises microtubule structure. *Chem Biol* 6, R65-9 --  
710 <http://www.ncbi.nlm.nih.gov/pubmed/10074470>
- 711 Appert-Rolland, C., Ebbinghaus, M., Santen, L. (2015). Intracellular transport driven by cytoskeletal motors:  
712 General mechanisms and defects. *Physics Reports* 593, 1-59 --  
713 <http://www.sciencedirect.com/science/article/pii/S037015731500335X>
- 714 Arnal, I., Wade, R. H. (1995). How does taxol stabilize microtubules? *Curr Biol* 5, 900-8 --  
715 <http://www.ncbi.nlm.nih.gov/pubmed/7583148>
- 716 Baas, P. W. (1999). Microtubules and neuronal polarity: lessons from mitosis. *Neuron* 22, 23-31 --
- 717 Baas, P. W., Ahmad, F. J. (2013). Beyond taxol: microtubule-based treatment of disease and injury of the  
718 nervous system. *Brain* -- <http://www.ncbi.nlm.nih.gov/pubmed/23811322>
- 719 Baas, P. W., Rao, A. N., Matamoros, A. J., Leo, L. (2016). Stability properties of neuronal microtubules.  
720 *Cytoskeleton (Hoboken)* 73, 442-60 -- <http://www.ncbi.nlm.nih.gov/pubmed/26887570>
- 721 Bailey, M. E., Sackett, D. L., Ross, J. L. (2015). Katanin Severing and Binding Microtubules Are Inhibited  
722 by Tubulin Carboxy Tails. *Biophys J* 109, 2546-61 --  
723 <https://www.ncbi.nlm.nih.gov/pmc/articles/PMC4699919/?otool=igbumllib>
- 724 Balabanian, L., Berger, C. L., Hendricks, A. G. (2017). Acetylated microtubules are preferentially bundled  
725 leading to enhanced kinesin-1 motility. *Biophys J* 113, 1551-1560 --  
726 <http://www.sciencedirect.com/science/article/pii/S0006349517308664>
- 727 Beaven, R., Dzhindzhev, N. S., Qu, Y., Hahn, I., Dajas-Bailador, F., Ohkura, H., Prokop, A. (2015).  
728 *Drosophila* CLIP-190 and mammalian CLIP-170 display reduced microtubule plus end association in  
729 the nervous system. *Mol Biol Cell* 26, 1491-1508 --  
730 <http://www.molbiolcell.org/content/26/8/1491.abstract>
- 731 Bechstedt, S., Lu, K., Brouhard, Gary J. (2014). Doublecortin recognizes the longitudinal curvature of the  
732 microtubule end and lattice. *Curr Biol* 24, 2366-2375 --  
733 <http://www.sciencedirect.com/science/article/pii/S0960982214010525>
- 734 Bellen, H. J., Tong, C., Tsuda, H. (2010). 100 years of *Drosophila* research and its impact on vertebrate  
735 neuroscience: a history lesson for the future. *Nat Rev Neurosci* 11, 514-522 --  
736 <http://www.nature.com/nrn/journal/v11/n7/full/nrn2839.html>
- 737 Benshalom, G., Reese, T. S. (1985). Ultrastructural observations on the cytoarchitecture of axons  
738 processed by rapid-freezing and freeze-substitution. *J Neurocytol* 14, 943-60 --  
739 <http://www.ncbi.nlm.nih.gov/pubmed/2420942>
- 740 Berg, J. M., Tymoczko, J. L., Stryer, L. (2002). "Biochemistry (5th edition)." W H Freeman, New York
- 741 Bernier, G., Kothary, R. (1998). Prenatal onset of axonopathy in Dystonia musculorum mice. *Dev Genet* 22,  
742 160-8 --  
743 [http://www.ncbi.nlm.nih.gov/entrez/query.fcgi?cmd=Retrieve&db=PubMed&dopt=Citation&list\\_uids=9581287](http://www.ncbi.nlm.nih.gov/entrez/query.fcgi?cmd=Retrieve&db=PubMed&dopt=Citation&list_uids=9581287)
- 744
- 745 Bettencourt da Cruz, A., Schwarzel, M., Schulze, S., Niyiyati, M., Heisenberg, M., Kretschmar, D. (2005).  
746 Disruption of the MAP1B-related protein FUTSCH leads to changes in the neuronal cytoskeleton,  
747 axonal transport defects, and progressive neurodegeneration in *Drosophila*. *Mol Biol Cell* 16, 2433-42  
748 --  
749 [http://www.ncbi.nlm.nih.gov/entrez/query.fcgi?cmd=Retrieve&db=PubMed&dopt=Citation&list\\_uids=15772149](http://www.ncbi.nlm.nih.gov/entrez/query.fcgi?cmd=Retrieve&db=PubMed&dopt=Citation&list_uids=15772149)
- 750
- 751 Bichenback, J. (2013). "International perspectives on spinal cord injury." WHO, ISCOS, Switzerland

- 752 Biswas, S., Kalil, K. (2018). The microtubule-associated protein tau mediates the organization of  
753 microtubules and their dynamic exploration of actin-rich lamellipodia and filopodia of cortical growth  
754 cones. *J Neurosci* 38, 291-307 -- <http://www.ncbi.nlm.nih.gov/pubmed/29167405>
- 755 Blackstone, C. (2018). Hereditary spastic paraplegia. *Handb Clin Neurol* 148, 633-652 --  
756 <http://www.ncbi.nlm.nih.gov/pubmed/29478605>
- 757 Blackstone, C., O'Kane, C. J., Reid, E. (2011). Hereditary spastic paraplegias: membrane traffic and the  
758 motor pathway. *Nat Rev Neurosci* 12, 31-42 -- <http://www.ncbi.nlm.nih.gov/pubmed/21139634>
- 759 Blanchoin, L., Michelot, A. (2012). Actin Cytoskeleton: A Team Effort during Actin Assembly. *Curr Biol* 22,  
760 R643-5 -- <http://www.ncbi.nlm.nih.gov/pubmed/22917514>
- 761 Bodaleo, F. J., Gonzalez-Billault, C. (2016). The presynaptic microtubule cytoskeleton in physiological and  
762 pathological conditions: lessons from *Drosophila* Fragile X Syndrome and Hereditary Spastic  
763 Paraplegias. *Frontiers in Molecular Neuroscience* 9, 60-60 --  
764 <https://www.ncbi.nlm.nih.gov/pubmed/27504085>
- 765 Bogoyevitch, M. A., Fairlie, D. P. (2007). A new paradigm for protein kinase inhibition: blocking  
766 phosphorylation without directly targeting ATP binding. *Drug Discov Today* 12, 622-33 --  
767 <http://www.ncbi.nlm.nih.gov/pubmed/17706543>
- 768 Bottenberg, W., Sánchez-Soriano, N., Alves-Silva, J., Hahn, I., Mende, M., Prokop, A. (2009). Context-  
769 specific requirements of functional domains of the Spectraplakins Short stop *in vivo*. *Mech Dev* 126,  
770 489-502 --  
771 [http://www.ncbi.nlm.nih.gov/entrez/query.fcgi?cmd=Retrieve&db=PubMed&dopt=Citation&list\\_uids=19](http://www.ncbi.nlm.nih.gov/entrez/query.fcgi?cmd=Retrieve&db=PubMed&dopt=Citation&list_uids=19409984)  
772 [409984](http://www.ncbi.nlm.nih.gov/entrez/query.fcgi?cmd=Retrieve&db=PubMed&dopt=Citation&list_uids=19409984)
- 773 Bradke, F., Fawcett, J. W., Spira, M. E. (2012). Assembly of a new growth cone after axotomy: the  
774 precursor to axon regeneration. *Nat Rev Neurosci* 13, 183-93 --  
775 <http://www.ncbi.nlm.nih.gov/pubmed/22334213>
- 776 Brandt, R. (1998). Cytoskeletal mechanisms of axon outgrowth and pathfinding. *Cell Tissue Res.* 292, 181-  
777 189 -- <https://link-springer-com.manchester.idm.oclc.org/article/10.1007%2Fs004410051049>
- 778 Brandt, R., Bakota, L. (2017). Microtubule dynamics and the neurodegenerative triad of Alzheimer's  
779 disease: The hidden connection. *J Neurochem* 173, 409-17 -- <http://dx.doi.org/10.1111/jnc.14011>
- 780 Brandt, R., Leger, J., Lee, G. (1995). Interaction of tau with the neural plasma membrane mediated by tau's  
781 amino-terminal projection domain. *J Cell Biol* 131, 1327-40 --  
782 <http://www.ncbi.nlm.nih.gov/pubmed/8522593>
- 783 Brangwynne, C. P., MacKintosh, F. C., Kumar, S., Geisse, N. A., Talbot, J., Mahadevan, L., Parker, K. K.,  
784 Ingber, D. E., Weitz, D. A. (2006). Microtubules can bear enhanced compressive loads in living cells  
785 because of lateral reinforcement. *J Cell Biol* 173, 733-41 --  
786 <http://www.ncbi.nlm.nih.gov/pubmed/16754957>
- 787 Brangwynne, C. P., MacKintosh, F. C., Weitz, D. A. (2007). Force fluctuations and polymerization dynamics  
788 of intracellular microtubules. *Proc Natl Acad Sci U S A* 104, 16128-33 --  
789 <http://www.ncbi.nlm.nih.gov/pubmed/17911265>
- 790 Bray, D. (1984). Axonal growth in response to experimentally applied mechanical tension. *Dev Biol* 102,  
791 379-89. -- [https://doi.org/10.1016/0012-1606\(84\)90202-1](https://doi.org/10.1016/0012-1606(84)90202-1)
- 792 Bridge, K. E., Berg, N., Adalbert, R., Babetto, E., Dias, T., Spillantini, M. G., Ribchester, R. R., Coleman, M.  
793 P. (2009). Late onset distal axonal swelling in YFP-H transgenic mice. *Neurobiol Aging* 30, 309-21 --  
794 <http://www.ncbi.nlm.nih.gov/pubmed/17658198>
- 795 Brouhard, G. J., Rice, L. M. (2018). Microtubule dynamics: an interplay of biochemistry and mechanics. *Nat*  
796 *Rev Mol Cell Biol* -- <https://doi.org/10.1038/s41580-018-0009-y>
- 797 Brunden, K. R., Trojanowski, J. Q., Smith, A. B., 3rd, Lee, V. M., Ballatore, C. (2014). Microtubule-  
798 stabilizing agents as potential therapeutics for neurodegenerative disease. *Bioorg Med Chem* 22,  
799 5040-9 -- <http://www.ncbi.nlm.nih.gov/pubmed/24433963>
- 800 Bucci, C., Bakke, O., Progida, C. (2012). Charcot-Marie-Tooth disease and intracellular traffic. *Prog*  
801 *Neurobiol* 99, 191-225 -- <http://www.ncbi.nlm.nih.gov/pubmed/22465036>
- 802 Buckminster Fuller, R. (1961). Tensegrity. *Portfolio and Art News Annual* 4, 112-127, 144, 148 --  
803 <http://www.rwgrayprojects.com/rbfnote/fpapers/tensegrity/tenseg01.html>
- 804 Burton, P. R., Hinkley, R. E., Pierson, G. B. (1975). Tannic acid-stained microtubules with 12, 13, and 15  
805 protofilaments. *J Cell Biol* 65, 227-33 -- <http://www.ncbi.nlm.nih.gov/pubmed/47861>

- 806 Butler, R., Wood, J. D., Landers, J. A., Cunliffe, V. T. (2010). Genetic and chemical modulation of spastin-  
807 dependent axon outgrowth in zebrafish embryos indicates a role for impaired microtubule dynamics in  
808 hereditary spastic paraplegia. *Dis Model Mech* 3, 743-51 -- [http://dmm.biologists.org/content/3/11-](http://dmm.biologists.org/content/3/11-12/743.long)  
809 [12/743.long](http://dmm.biologists.org/content/3/11-12/743.long)
- 810 Buxbaum, R. E., Heidemann, S. R. (1988). A thermodynamic model for force integration and microtubule  
811 assembly during axonal elongation. *J Theor Biol* 134, 379-90 --  
812 <http://www.ncbi.nlm.nih.gov/pubmed/3254435>
- 813 Cabrales Fontela, Y., Kadavath, H., Biernat, J., Riedel, D., Mandelkow, E., Zweckstetter, M. (2017).  
814 Multivalent cross-linking of actin filaments and microtubules through the microtubule-associated  
815 protein Tau. *Nature Communications* 8, 1981 -- <https://doi.org/10.1038/s41467-017-02230-8>
- 816 Calkins, D. J. (2013). Age-Related Changes in the Visual Pathways: Blame It on the AxonAge-Related  
817 Changes in the Visual Pathways. *Investigative Ophthalmology & Visual Science* 54, ORSF37-ORSF41  
818 -- <https://dx.doi.org/10.1167/iov.13-12784>
- 819 Case, L. B., Waterman, C. M. (2015). Integration of actin dynamics and cell adhesion by a three-  
820 dimensional, mechanosensitive molecular clutch. *Nat Cell Biol* --  
821 <http://www.ncbi.nlm.nih.gov/pubmed/26121555>
- 822 Castle, B. T., McCubbin, S., Prah, L. S., Bernens, J. N., Sept, D., Odde, D. J. (2017). Mechanisms of  
823 kinetic stabilization by the drugs paclitaxel and vinblastine. *Molecular Biology of the Cell* 28, 1238-  
824 1257 -- <https://www.molbiolcell.org/doi/abs/10.1091/mbc.e16-08-0567>
- 825 Chaaban, S., Brouhard, G. J. (2017). A microtubule bestiary: structural diversity in tubulin polymers. *Mol*  
826 *Biol Cell* 28, 2924-2931 -- <http://www.molbiolcell.org/content/28/22/2924.abstract>
- 827 Chalfie, M., Thomson, J. N. (1982). Structural and functional diversity in the neuronal microtubules of  
828 *Caenorhabditis elegans*. *J Cell Biol* 93, 15-23 -- <http://www.ncbi.nlm.nih.gov/pubmed/7068753>
- 829 Chapin, S. J., Bulinski, J. C., Gundersen, G. G. (1991). Microtubule bundling in cells. *Nature* 349, 24 --  
830 [http://www.ncbi.nlm.nih.gov/entrez/query.fcgi?cmd=Retrieve&db=PubMed&dopt=Citation&list\\_uids=16](http://www.ncbi.nlm.nih.gov/entrez/query.fcgi?cmd=Retrieve&db=PubMed&dopt=Citation&list_uids=1670738)  
831 [70738](http://www.ncbi.nlm.nih.gov/entrez/query.fcgi?cmd=Retrieve&db=PubMed&dopt=Citation&list_uids=1670738)
- 832 Chen, Y., Hancock, W. O. (2015). Kinesin-5 is a microtubule polymerase. *Nat Commun* 6, 8160 --  
833 <http://www.ncbi.nlm.nih.gov/pubmed/26437877>
- 834 Chrétien, D., Fuller, S. D. (2000). Microtubules switch occasionally into unfavorable configurations during  
835 elongation. *J Mol Biol* 298, 663-76 -- <http://www.ncbi.nlm.nih.gov/pubmed/10788328>
- 836 Chrétien, D., Kenney, J. M., Fuller, S. D., Wade, R. H. (1996). Determination of microtubule polarity by  
837 cryo-electron microscopy. *Structure* 4, 1031-40 -- <http://www.ncbi.nlm.nih.gov/pubmed/8805589>
- 838 Chrétien, D., Wade, R. H. (1991). New data on the microtubule surface lattice. *Biol Cell* 71, 161-74 --  
839 <http://www.ncbi.nlm.nih.gov/pubmed/1912942>
- 840 Chung, P. J., Song, C., Deek, J., Miller, H. P., Li, Y., Choi, M. C., Wilson, L., Feinstein, S. C., Safinya, C. R.  
841 (2016). Tau mediates microtubule bundle architectures mimicking fascicles of microtubules found in  
842 the axon initial segment. *Nat Commun* 7, 12278 -- <http://dx.doi.org/10.1038/ncomms12278>
- 843 Cioni, J. M., Koppers, M., Holt, C. E. (2018). Molecular control of local translation in axon development and  
844 maintenance. *Curr Opin Neurobiol* 51, 86-94 -- <http://www.ncbi.nlm.nih.gov/pubmed/29549711>
- 845 Cohen, J. E. (2004). Mathematics is biology's next microscope, only better; biology is mathematics' next  
846 physics, only better. *PLoS Biol* 2, e439 -- <http://www.ncbi.nlm.nih.gov/pubmed/15597117>
- 847 Cohen, B. A. (2017). How should novelty be valued in science? *Elife* 6, e28699 --  
848 <https://doi.org/10.7554/eLife.28699>
- 849 Court, F. A., Midha, R., Cisterna, B. A., Grochmal, J., Shakhbazov, A., Hendriks, W. T., Van Minnen, J.  
850 (2011). Morphological evidence for a transport of ribosomes from Schwann cells to regenerating  
851 axons. *Glia* 59, 1529-1539 -- <https://onlinelibrary.wiley.com/doi/abs/10.1002/glia.21196>
- 852 Crenshaw, J. D., Liang, T., Hess, H., Phillpot, S. R. (2011). A cellular automation approach to the  
853 simulation of active self-assembly of kinesin-powered molecular shuttles. *J Comp Theoret Nanosci* 8,  
854 1999-2005 -- <https://doi-org.manchester.idm.oclc.org/10.1166/jctn.2011.1916>
- 855 Cross, R. A. (2019). Microtubule lattice plasticity. *Curr Opin Cell Biol* 56, 88-93 --  
856 <http://www.sciencedirect.com/science/article/pii/S0955067418301418>
- 857 Dalpe, G., Leclerc, N., Vallee, A., Messer, A., Mathieu, M., De Repentigny, Y., Kothary, R. (1998). Dystonin  
858 is essential for maintaining neuronal cytoskeleton organization. *Mol Cell Neurosci* 10, 243-57 --  
859 [http://www.ncbi.nlm.nih.gov/entrez/query.fcgi?cmd=Retrieve&db=PubMed&dopt=Citation&list\\_uids=96](http://www.ncbi.nlm.nih.gov/entrez/query.fcgi?cmd=Retrieve&db=PubMed&dopt=Citation&list_uids=9604204)  
860 [04204](http://www.ncbi.nlm.nih.gov/entrez/query.fcgi?cmd=Retrieve&db=PubMed&dopt=Citation&list_uids=9604204)

- 861 Datar, A., Ameeramja, J., Bhat, A., Srivastava, R., Bernal, R., Prost, J., Callan-Jones, A., Pullarkat, P. A.  
862 (2019). The roles of microtubules and membrane tension in axonal beading, retraction, and atrophy.  
863 bioRxiv, 10.1101/575258 -- <https://www.biorxiv.org/content/biorxiv/early/2019/03/12/575258.full>
- 864 Davis, L. J., Odde, D. J., Block, S. M., Gross, S. P. (2002). The importance of lattice defects in katanin-  
865 mediated microtubule mevering *in vitro*. *Biophysical Journal* 82, 2916-2927 --  
866 [https://doi.org/10.1016/S0006-3495\(02\)75632-4](https://doi.org/10.1016/S0006-3495(02)75632-4)
- 867 de Rooij, R., Kuhl, E. (2018). Microtubule polymerization and cross-link dynamics explain axonal stiffness  
868 and damage. *Biophys J* 114, 201-212 --  
869 <https://www.sciencedirect.com/science/article/pii/S0006349517312390>
- 870 DeBonis, S., Neumann, E., Skoufias, D. A. (2015). Self protein-protein interactions are involved in  
871 TPPP/p25 mediated microtubule bundling. *Sci Rep* 5, 13242 --  
872 <http://www.ncbi.nlm.nih.gov/pubmed/26289831>
- 873 Dennerll, T. J., Joshi, H. C., Steel, V. L., Buxbaum, R. E., Heidemann, S. R. (1988). Tension and  
874 compression in the cytoskeleton of PC-12 neurites. II: Quantitative measurements. *J Cell Biol* 107,  
875 665-74 -- <http://www.ncbi.nlm.nih.gov/pubmed/3417767>
- 876 Dent, E. W., Gupton, S. L., Gertler, F. B. (2011). The growth cone cytoskeleton in axon outgrowth and  
877 guidance. *Cold Spring Harb Perspect Biol* 3, a001800 --  
878 [http://www.ncbi.nlm.nih.gov/entrez/query.fcgi?cmd=Retrieve&db=PubMed&dopt=Citation&list\\_uids=21](http://www.ncbi.nlm.nih.gov/entrez/query.fcgi?cmd=Retrieve&db=PubMed&dopt=Citation&list_uids=21106647)  
879 [106647](http://www.ncbi.nlm.nih.gov/entrez/query.fcgi?cmd=Retrieve&db=PubMed&dopt=Citation&list_uids=21106647)
- 880 Dent, E. W., Kalil, K. (2001). Axon branching requires interactions between dynamic microtubules and actin  
881 filaments. *J Neurosci* 21, 9757-69 --  
882 <http://www.jneurosci.org/manchester.idm.oclc.org/content/21/24/9757.long>
- 883 Denton, K. R., Lei, L., Grenier, J., Rodionov, V., Blackstone, C., Li, X. J. (2014). Loss of spastin function  
884 results in disease-specific axonal defects in human pluripotent stem cell-based models of hereditary  
885 spastic paraplegia. *Stem Cells* 32, 414-23 -- <http://www.ncbi.nlm.nih.gov/pubmed/24123785>
- 886 Diaz-Valencia, J. D., Morelli, M. M., Bailey, M., Zhang, D., Sharp, D. J., Ross, J. L. (2011). *Drosophila*  
887 katanin-60 depolymerizes and severs at microtubule defects. *Biophys J* 100, 2440-9 --  
888 <http://www.ncbi.nlm.nih.gov/pubmed/21575578>
- 889 Dogterom, M., Koenderink, G. H. (2019). Actin–microtubule crosstalk in cell biology. *Nat Rev Mol Cell Biol*  
890 20, 38-54 -- <https://doi.org/10.1038/s41580-018-0067-1>
- 891 Dong, Z., Wu, S., Zhu, C., Wang, X., Li, Y., Chen, X., Liu, D., Qiang, L., Baas, P. W., Liu, M. (2019).  
892 Clustered Regularly Interspaced Short Palindromic Repeats (CRISPR)/Cas9-mediated kif15 mutations  
893 accelerate axonal outgrowth during neuronal development and regeneration in zebrafish. *Traffic* 20,  
894 71-81 -- <http://www.ncbi.nlm.nih.gov/pubmed/30411440>
- 895 Dumont, E., L. P., Do, C., Hess, H. (2015). Molecular wear of microtubules propelled by surface-adhered  
896 kinesins. *Nat Nano* 10, 166-169 -- <http://dx.doi.org/10.1038/nnano.2014.334>
- 897 Edvardson, S., Cinnamon, Y., Jalas, C., Shaag, A., Maayan, C., Axelrod, F. B., Elpeleg, O. (2012).  
898 Hereditary sensory autonomic neuropathy caused by a mutation in dystonin. *Ann Neurol* 71, 569-72 --  
899 <http://www.ncbi.nlm.nih.gov/pubmed/22522446>
- 900 Eira, J., Silva, C. S., Sousa, M. M., Liz, M. A. (2016). The cytoskeleton as a novel therapeutic target for old  
901 neurodegenerative disorders. *Progress in Neurobiology* --  
902 <http://www.sciencedirect.com/science/article/pii/S0301008215300800>
- 903 Elbaum, M., Kuchnir Fygenson, D., Libchaber, A. (1996). Buckling microtubules in vesicles. *Phys Rev Lett*  
904 76, 4078-4081 -- <http://www.ncbi.nlm.nih.gov/pubmed/10061186>
- 905 Elden, A. C., Kim, H.-J., Hart, M. P., Chen-Plotkin, A. S., Johnson, B. S., Fang, X., Armakola, M., Geser, F.,  
906 Greene, R., Lu, M. M., Padmanabhan, A., Clay-Falcone, D., McCluskey, L., Elman, L., Jühr, D.,  
907 Gruber, P. J., Rüb, U., Auburger, G., Trojanowski, J. Q., Lee, V. M. Y., Van Deerlin, V. M., Bonini, N.  
908 M., Gitler, A. D. (2010). Ataxin-2 intermediate-length polyglutamine expansions are associated with  
909 increased risk for ALS. *Nature* 466, 1069 -- <https://doi.org/10.1038/nature09320>
- 910 Elie, A., Prezel, E., Guerin, C., Denarier, E., Ramirez-Rios, S., Serre, L., Andrieux, A., Fourest-Lieuvain, A.,  
911 Blanchoin, L., Arnal, I. (2015). Tau co-organizes dynamic microtubule and actin networks. *Sci Rep* 5,  
912 9964 -- <http://www.ncbi.nlm.nih.gov/pubmed/25944224>
- 913 Ettlinger, A., van Haren, J., Ribeiro, S. A., Wittmann, T. (2016). Doublecortin is excluded from growing  
914 microtubule ends and recognizes the GDP-microtubule lattice. *Curr Biol* 26, 1549-1555 --  
915 <http://www.ncbi.nlm.nih.gov/pubmed/27238282>

- 916 Eyer, J., Cleveland, D. W., Wong, P. C., Peterson, A. C. (1998). Pathogenesis of two axonopathies does  
917 not require axonal neurofilaments. *Nature* 391, 584-7 --  
918 [http://www.ncbi.nlm.nih.gov/entrez/query.fcgi?cmd=Retrieve&db=PubMed&dopt=Citation&list\\_uids=94](http://www.ncbi.nlm.nih.gov/entrez/query.fcgi?cmd=Retrieve&db=PubMed&dopt=Citation&list_uids=9468135)  
919 [68135](http://www.ncbi.nlm.nih.gov/entrez/query.fcgi?cmd=Retrieve&db=PubMed&dopt=Citation&list_uids=9468135)
- 920 Eyer, J., Peterson, A. (1994). Neurofilament-deficient axons and perikaryal aggregates in viable transgenic  
921 mice expressing a neurofilament-beta-galactosidase fusion protein. *Neuron* 12, 389-405 --  
922 <http://www.ncbi.nlm.nih.gov/pubmed/8110465>
- 923 Fan, A., Tofangchi, A., Kandel, M., Popescu, G., Saif, T. (2017). Coupled circumferential and axial tension  
924 driven by actin and myosin influences in vivo axon diameter. *Sci Rep* 7, 14188 --  
925 <http://www.ncbi.nlm.nih.gov/pubmed/29079766>
- 926 Farah, C. A., Nguyen, M. D., Julien, J. P., Leclerc, N. (2003). Altered levels and distribution of microtubule-  
927 associated proteins before disease onset in a mouse model of amyotrophic lateral sclerosis. *J*  
928 *Neurochem* 84, 77-86 -- <http://www.ncbi.nlm.nih.gov/pubmed/12485403>
- 929 Fass, J. N., Odde, D. J. (2003). Tensile force-dependent neurite elicitation via anti-beta1 integrin antibody-  
930 coated magnetic beads. *Biophys J* 85, 623-36 -- <http://www.ncbi.nlm.nih.gov/pubmed/12829516>
- 931 Fassier, C., Tarrade, A., Peris, L., Courageot, S., Mailly, P., Dalard, C., Delga, S., Roblot, N., Lefevre, J.,  
932 Job, D., Hazan, J., Curmi, P. A., Melki, J. (2013). Microtubule-targeting drugs rescue axonal swellings  
933 in cortical neurons from spastin knockout mice. *Dis Model Mech* 6, 72-83 --  
934 <http://www.ncbi.nlm.nih.gov/pubmed/22773755>
- 935 Ferrier, A., Boyer, J. G., Kothary, R. (2013). Cellular and molecular biology of neuronal Dystonin. *Int Rev*  
936 *Cell Mol Biol* 300, 85-120 -- <http://www.ncbi.nlm.nih.gov/pubmed/23273860>
- 937 Fiala, J. C., Feinberg, M., Peters, A., Barbas, H. (2007). Mitochondrial degeneration in dystrophic neurites  
938 of senile plaques may lead to extracellular deposition of fine filaments. *Brain Struct Funct* 212, 195-  
939 207 --  
940 [http://www.ncbi.nlm.nih.gov/entrez/query.fcgi?cmd=Retrieve&db=PubMed&dopt=Citation&list\\_uids=17](http://www.ncbi.nlm.nih.gov/entrez/query.fcgi?cmd=Retrieve&db=PubMed&dopt=Citation&list_uids=17717688)  
941 [717688](http://www.ncbi.nlm.nih.gov/entrez/query.fcgi?cmd=Retrieve&db=PubMed&dopt=Citation&list_uids=17717688)
- 942 Fletcher, D. A., Mullins, R. D. (2010). Cell mechanics and the cytoskeleton. *Nature* 463, 485-92 --  
943 <http://www.ncbi.nlm.nih.gov/pubmed/20110992>
- 944 Fransen, M., Lismont, C., Walton, P. (2017). The Peroxisome-Mitochondria Connection: How and Why? *Int*  
945 *J Mol Sci* 18 -- <http://www.ncbi.nlm.nih.gov/pubmed/28538669>
- 946 Franze, K., Gerdelmann, J., Weick, M., Betz, T., Pawlizak, S., Lakadamyali, M., Bayer, J., Rillich, K.,  
947 Gogler, M., Lu, Y. B., Reichenbach, A., Janmey, P., Kas, J. (2009). Neurite branch retraction is caused  
948 by a threshold-dependent mechanical impact. *Biophys J* 97, 1883-90 --  
949 <http://www.ncbi.nlm.nih.gov/pubmed/19804718>
- 950 Friede, R. L., Samorajski, T. (1970). Axon caliber related to neurofilaments and microtubules in sciatic  
951 nerve fibers of rats and mice. *Anat Rec* 167, 379-87 --  
952 [http://www.ncbi.nlm.nih.gov/entrez/query.fcgi?cmd=Retrieve&db=PubMed&dopt=Citation&list\\_uids=54](http://www.ncbi.nlm.nih.gov/entrez/query.fcgi?cmd=Retrieve&db=PubMed&dopt=Citation&list_uids=5454590)  
953 [54590](http://www.ncbi.nlm.nih.gov/entrez/query.fcgi?cmd=Retrieve&db=PubMed&dopt=Citation&list_uids=5454590)
- 954 Frühbeis, C., Fröhlich, D., Kuo, W. P., Amphornrat, J., Thilemann, S., Saab, A. S., Kirchhoff, F., Möbius,  
955 W., Goebels, S., Nave, K. A., Schneider, A., Simons, M., Klugmann, M., Trotter, J., Krämer-Albers, E.  
956 M. (2013). Neurotransmitter-triggered transfer of exosomes mediates oligodendrocyte-neuron  
957 communication. *PLoS Biol* 11, e1001604 -- <http://www.ncbi.nlm.nih.gov/pubmed/23874151>
- 958 Gaetz, M. (2004). The neurophysiology of brain injury. *Clin Neurophysiol* 115, 4-18 --  
959 <http://www.ncbi.nlm.nih.gov/pubmed/14706464>
- 960 Gardner, M. K., Zanic, M., Gell, C., Bormuth, V., Howard, J. (2011). Depolymerizing kinesins Kip3 and  
961 MCAK shape cellular microtubule architecture by differential control of catastrophe. *Cell* 147, 1092-  
962 103 -- <http://www.ncbi.nlm.nih.gov/pubmed/22118464>
- 963 Gasic, I., Mitchison, T. J. (2018). Autoregulation and repair in microtubule homeostasis. *Curr Opin Cell Biol*  
964 56, 80-87 -- <http://www.ncbi.nlm.nih.gov/pubmed/30415186>
- 965 Geyer, E. A., Burns, A., Lalonde, B. A., Ye, X., Piedra, F.-A., Huffaker, T. C., Rice, L. M. (2015). A mutation  
966 uncouples the tubulin conformational and GTPase cycles, revealing allosteric control of microtubule  
967 dynamics. *Elife* 4, e10113 -- <https://doi.org/10.7554/eLife.10113>
- 968 Giuditta, A., Eyman, M., Kaplan, B. B. (2002a). Gene expression in the squid giant axon: neurotransmitter  
969 modulation of RNA transfer from periaxonal glia to the axon. *Biol Bull* 203, 189-90 --  
970 <https://www.journals.uchicago.edu/doi/10.2307/1543389>

- 971 Giuditta, A., Kaplan, B. B., van Minnen, J., Alvarez, J., Koenig, E. (2002b). Axonal and presynaptic protein  
972 synthesis: new insights into the biology of the neuron. *Trends Neurosci* 25, 400-4 --  
973 <http://www.ncbi.nlm.nih.gov/pubmed/12127756>
- 974 Goldstein, A. Y., Wang, X., Schwarz, T. L. (2008). Axonal transport and the delivery of pre-synaptic  
975 components. *Curr Opin Neurobiol* 18, 495-503 -- <http://www.ncbi.nlm.nih.gov/pubmed/18950710>
- 976 Gonçalves-Pimentel, C., Gombos, R., Mihály, J., Sánchez-Soriano, N., Prokop, A. (2011). Dissecting  
977 regulatory networks of filopodia formation in a *Drosophila* growth cone model. *PLoS ONE* 6, e18340 --  
978 <http://www.plosone.org/article/info%3Adoi%2F10.1371%2Fjournal.pone.0018340>
- 979 Gondre-Lewis, M. C., Park, J. J., Loh, Y. P. (2012). Cellular mechanisms for the biogenesis and transport  
980 of synaptic and dense-core vesicles. *Int Rev Cell Mol Biol* 299, 27-115 --  
981 <http://www.ncbi.nlm.nih.gov/pubmed/22959301>
- 982 Gonzalez, C., Couve, A. (2014). The axonal endoplasmic reticulum and protein trafficking: Cellular  
983 bootlegging south of the soma. *Semin Cell Dev Biol* 27, 23-31 --  
984 <http://www.ncbi.nlm.nih.gov/pubmed/24361785>
- 985 Goodwin, S. S., Vale, R. D. (2010). Patronin regulates the microtubule network by protecting microtubule  
986 minus ends. *Cell* 143, 263-74 --  
987 [http://www.ncbi.nlm.nih.gov/entrez/query.fcgi?cmd=Retrieve&db=PubMed&dopt=Citation&list\\_uids=20](http://www.ncbi.nlm.nih.gov/entrez/query.fcgi?cmd=Retrieve&db=PubMed&dopt=Citation&list_uids=20946984)  
988 [946984](http://www.ncbi.nlm.nih.gov/entrez/query.fcgi?cmd=Retrieve&db=PubMed&dopt=Citation&list_uids=20946984)
- 989 Goriounov, D., Leung, C. L., Liem, R. K. (2003). Protein products of human Gas2-related genes on  
990 chromosomes 17 and 22 (hGAR17 and hGAR22) associate with both microfilaments and  
991 microtubules. *J Cell Sci* 116, 1045-58 --  
992 [http://www.ncbi.nlm.nih.gov/entrez/query.fcgi?cmd=Retrieve&db=PubMed&dopt=Citation&list\\_uids=12](http://www.ncbi.nlm.nih.gov/entrez/query.fcgi?cmd=Retrieve&db=PubMed&dopt=Citation&list_uids=12584248)  
993 [584248](http://www.ncbi.nlm.nih.gov/entrez/query.fcgi?cmd=Retrieve&db=PubMed&dopt=Citation&list_uids=12584248)
- 994 Gosselin, P., Mohrbach, H., Kulić, I. M., Ziebert, F. (2016). On complex, curved trajectories in microtubule  
995 gliding. *Physica D: Nonlinear Phenomena* 318–319, 105-111 --  
996 <http://www.sciencedirect.com/science/article/pii/S0167278915002183>
- 997 Gu, C., Yaddanapudi, S., Weins, A., Osborn, T., Reiser, J., Pollak, M., Hartwig, J., Sever, S. (2010). Direct  
998 dynamin–actin interactions regulate the actin cytoskeleton. *The EMBO Journal* 29, 3593-3606 --  
999 <http://emboj.embopress.org/content/embojnl/29/21/3593.full.pdf>
- 1000 Gumy, L. F., Chew, D. J., Tortosa, E., Katrukha, E. A., Kapitein, L. C., Tolkovsky, A. M., Hoogenraad, C.  
1001 C., Fawcett, J. W. (2013). The kinesin-2 family member KIF3C regulates microtubule dynamics and is  
1002 required for axon growth and regeneration. *J Neurosci* 33, 11329-11345 --  
1003 <http://www.jneurosci.org/content/jneuro/33/28/11329.full.pdf>
- 1004 Gunawardena, J. (2014). Models in biology: 'accurate descriptions of our pathetic thinking'. *BMC Biology*  
1005 12, 29 -- <http://www.biomedcentral.com/1741-7007/12/29>
- 1006 Gupta, K. K., Alberico, E. O., Nathke, I. S., Goodson, H. V. (2014). Promoting microtubule assembly: A  
1007 hypothesis for the functional significance of the +TIP network. *Bioessays* 36, 818-26 --  
1008 <http://www.ncbi.nlm.nih.gov/pubmed/24943963>
- 1009 Guzik-Lendrum, S., Rayment, I., Gilbert, S. P. (2017). Homodimeric kinesin-2 KIF3CC promotes  
1010 microtubule dynamics. *Biophys J* 113, 1845-1857 -- <http://www.ncbi.nlm.nih.gov/pubmed/29045878>
- 1011 Gyoeva, F. K. (2014). The role of motor proteins in signal propagation. *Biochemistry (Moscow)* 79, 849-855  
1012 -- <http://dx.doi.org/10.1134/S0006297914090028>
- 1013 Hahn, I., Ronshaugen, M., Sánchez-Soriano, N., Prokop, A. (2016). Functional and genetic analysis of  
1014 spectraplakins in *Drosophila*. *Methods Enzymol* 569, 373-405 -- <https://tinyurl.com/y4vhld56>
- 1015 Hall, A., Lalli, G. (2010). Rho and Ras GTPases in axon growth, guidance, and branching. *Cold Spring*  
1016 *Harb Perspect Biol* 2, a001818 --  
1017 [http://www.ncbi.nlm.nih.gov/entrez/query.fcgi?cmd=Retrieve&db=PubMed&dopt=Citation&list\\_uids=20](http://www.ncbi.nlm.nih.gov/entrez/query.fcgi?cmd=Retrieve&db=PubMed&dopt=Citation&list_uids=20182621)  
1018 [182621](http://www.ncbi.nlm.nih.gov/entrez/query.fcgi?cmd=Retrieve&db=PubMed&dopt=Citation&list_uids=20182621)
- 1019 Havlicek, S., Kohl, Z., Mishra, H. K., Prots, I., Eberhardt, E., Denguir, N., Wend, H., Plotz, S., Boyer, L.,  
1020 Marchetto, M. C., Aigner, S., Sticht, H., Groemer, T. W., Hehr, U., Lampert, A., Schlotzer-Schrehardt,  
1021 U., Winkler, J., Gage, F. H., Winner, B. (2014). Gene dosage-dependent rescue of HSP neurite  
1022 defects in SPG4 patients' neurons. *Hum Mol Genet* 23, 2527-41 --  
1023 <http://www.ncbi.nlm.nih.gov/pubmed/24381312>
- 1024 Hawkins, T., Mirigian, M., Selcuk Yasar, M., Ross, J. L. (2010). Mechanics of microtubules. *J Biomech* 43,  
1025 23-30 -- <http://www.ncbi.nlm.nih.gov/pubmed/19815217>

- 1026 He, L., Ahmad, M., Perrimon, N. (2019). Mechanosensitive channels and their functions in stem cell  
1027 differentiation. *Exp Cell Res* 374, 259-265 -- <http://www.ncbi.nlm.nih.gov/pubmed/30500393>
- 1028 He, Y., Francis, F., Myers, K. A., Yu, W., Black, M. M., Baas, P. W. (2005). Role of cytoplasmic dynein in  
1029 the axonal transport of microtubules and neurofilaments. *J Cell Biol* 168, 697-703 --  
1030 [http://www.ncbi.nlm.nih.gov/entrez/query.fcgi?cmd=Retrieve&db=PubMed&dopt=Citation&list\\_uids=15](http://www.ncbi.nlm.nih.gov/entrez/query.fcgi?cmd=Retrieve&db=PubMed&dopt=Citation&list_uids=15728192)  
1031 [728192](http://www.ncbi.nlm.nih.gov/entrez/query.fcgi?cmd=Retrieve&db=PubMed&dopt=Citation&list_uids=15728192)
- 1032 Heidemann, S. R., Buxbaum, R. E. (1990). Tension as a regulator and integrator of axonal growth. *Cell*  
1033 *Motil Cytoskeleton* 17, 6-10 -- <http://www.ncbi.nlm.nih.gov/pubmed/2225090>
- 1034 Heidemann, S. R., Lamoureux, P., Buxbaum, R. E. (1990). Growth cone behavior and production of  
1035 traction force. *J Cell Biol* 111, 1949-57 --  
1036 <http://jcb.rupress.org/manchester.idm.oclc.org/content/111/5/1949.long>
- 1037 Hess, H., Clemmens, J., Brunner, C., Doot, R., Luna, S., Ernst, K. H., Vogel, V. (2005). Molecular self-  
1038 assembly of "nanowires" and "nanospools" using active transport. *Nano Lett* 5, 629-33 --  
1039 <http://www.ncbi.nlm.nih.gov/pubmed/15826099>
- 1040 Hinckelmann, M. V., Virlogeux, A., Niehage, C., Poujol, C., Choquet, D., Hoflack, B., Zala, D., Saudou, F.  
1041 (2016). Self-propelling vesicles define glycolysis as the minimal energy machinery for neuronal  
1042 transport. *Nat Commun* 7, 13233 -- <http://www.ncbi.nlm.nih.gov/pubmed/27775035>
- 1043 Hirokawa, N. (1982). Cross-linker system between neurofilaments, microtubules, and membranous  
1044 organelles in frog axons revealed by the quick-freeze, deep-etching method. *J Cell Biol* 94, 129-42 --  
1045 <http://www.ncbi.nlm.nih.gov/pubmed/6181077>
- 1046 Hirokawa, N. (1986). 270K microtubule-associated protein cross-reacting with anti-MAP2 IgG in the  
1047 crayfish peripheral nerve axon. *J Cell Biol* 103, 33-9 -- <http://www.ncbi.nlm.nih.gov/pubmed/3722268>
- 1048 Hirokawa, N., Niwa, S., Tanaka, Y. (2010). Molecular motors in neurons: transport mechanisms and roles  
1049 in brain function, development, and disease. *Neuron* 68, 610-638 --  
1050 <http://www.ncbi.nlm.nih.gov/pubmed/21092854>
- 1051 Hoffman, P. N. (1995). Review : The Synthesis, Axonal Transport, and Phosphorylation of Neurofilaments  
1052 Determine Axonal Caliber in Myelinated Nerve Fibers. *The Neuroscientist* 1, 76-83 --  
1053 <https://journals.sagepub.com/doi/abs/10.1177/107385849500100204>
- 1054 Homma, N., Takei, Y., Tanaka, Y., Nakata, T., Terada, S., Kikkawa, M., Noda, Y., Hirokawa, N. (2003).  
1055 Kinesin superfamily protein 2A (KIF2A) functions in suppression of collateral branch extension. *Cell*  
1056 114, 229-39 -- <http://www.ncbi.nlm.nih.gov/pubmed/12887924>
- 1057 Howard, J. (2001). "Mechanics of motorproteins and the cytoskeleton." Sinauer Assoc., Sunderland --
- 1058 Howes, S. C., Alushin, G. M., Shida, T., Nachury, M. V., Nogales, E. (2014). Effects of tubulin acetylation  
1059 and tubulin acetyltransferase binding on microtubule structure. *Mol Biol Cell* 25, 257-66 --  
1060 <http://www.ncbi.nlm.nih.gov/pubmed/24227885>
- 1061 Hummel, T., Krukkert, K., Roos, J., Davis, G., Klämbt, C. (2000). *Drosophila* Futsch/22C10 is a MAP1B-like  
1062 protein required for dendritic and axonal development. *Neuron* 26, 357-370 --  
1063 [https://www.cell.com/neuron/fulltext/S0896-6273\(00\)81169-1](https://www.cell.com/neuron/fulltext/S0896-6273(00)81169-1)
- 1064 Hur, E. M., Saijilafu, Lee, B. D., Kim, S. J., Xu, W. L., Zhou, F. Q. (2011). GSK3 controls axon growth via  
1065 CLASP-mediated regulation of growth cone microtubules. *Genes Dev* 25, 1968-81 --  
1066 [http://www.ncbi.nlm.nih.gov/entrez/query.fcgi?cmd=Retrieve&db=PubMed&dopt=Citation&list\\_uids=21](http://www.ncbi.nlm.nih.gov/entrez/query.fcgi?cmd=Retrieve&db=PubMed&dopt=Citation&list_uids=21937714)  
1067 [937714](http://www.ncbi.nlm.nih.gov/entrez/query.fcgi?cmd=Retrieve&db=PubMed&dopt=Citation&list_uids=21937714)
- 1068 Hyman, A. A., Chretien, D., Arnal, I., Wade, R. H. (1995). Structural changes accompanying GTP  
1069 hydrolysis in microtubules: information from a slowly hydrolyzable analogue guanylyl-(alpha,beta)-  
1070 methylene-diphosphonate. *J Cell Biol* 128, 117-25 -- <http://www.ncbi.nlm.nih.gov/pubmed/7822409>
- 1071 Ichikawa, M., Bui, K. H. (2018). Microtubule inner proteins: a meshwork of luminal proteins stabilizing the  
1072 doublet microtubule. *BioEssays* 40, 1700209 --  
1073 <https://onlinelibrary.wiley.com/doi/abs/10.1002/bies.201700209>
- 1074 Ingber, D., Folkman, J. (1989). Tension and compression as basic determinants of cell form and function:  
1075 Utilization of a cellular tensegrity mechanism. In "Cell Shape: Determinants, Regulation and  
1076 Regulatory Role" (W. Stein, F. Bronner, Eds.), pp. 3-31. Academic Press, San Diego
- 1077 Janke, C., Kneussel, M. (2010). Tubulin post-translational modifications: encoding functions on the  
1078 neuronal microtubule cytoskeleton. *Trends Neurosci* 33, 362-72 --  
1079 [http://www.ncbi.nlm.nih.gov/entrez/query.fcgi?cmd=Retrieve&db=PubMed&dopt=Citation&list\\_uids=20](http://www.ncbi.nlm.nih.gov/entrez/query.fcgi?cmd=Retrieve&db=PubMed&dopt=Citation&list_uids=20541813)  
1080 [541813](http://www.ncbi.nlm.nih.gov/entrez/query.fcgi?cmd=Retrieve&db=PubMed&dopt=Citation&list_uids=20541813)



- 1081 Janning, D., Igaev, M., Sundermann, F., Bruhmann, J., Beutel, O., Heinisch, J. J., Bakota, L., Piehler, J.,  
1082 Junge, W., Brandt, R. (2014). Single-molecule tracking of tau reveals fast kiss-and-hop interaction with  
1083 microtubules in living neurons. *Mol Biol Cell* 25, 3541-51 --  
1084 <http://www.ncbi.nlm.nih.gov/pubmed/25165145>
- 1085 Jenkins, B. V., Saunders, H. A. J., Record, H. L., Johnson-Schlitz, D. M., Wildonger, J. (2017). Effects of  
1086 mutating alpha-tubulin lysine 40 on sensory dendrite development. *J Cell Sci* 130, 4120-4131 --  
1087 <http://www.ncbi.nlm.nih.gov/pubmed/29122984>
- 1088 Jiang, K., Faltova, L., Hua, S., Capitani, G., Prota, A. E., Landgraf, C., Volkmer, R., Kammerer, R. A.,  
1089 Steinmetz, M. O., Akhmanova, A. (2018). Structural basis of formation of the microtubule minus-end-  
1090 regulating CAMSAP-katanin complex. *Structure* 26, 375-382 e4 --  
1091 <http://www.ncbi.nlm.nih.gov/pubmed/29395789>
- 1092 Kabir, A. M., Inoue, D., Hamano, Y., Mayama, H., Sada, K., Kakugo, A. (2014). Biomolecular motor  
1093 modulates mechanical property of microtubule. *Biomacromolecules* 15, 1797-805 --  
1094 <http://www.ncbi.nlm.nih.gov/pubmed/24697688>
- 1095 Kader, M. A., Satake, T., Yoshida, M., Hayashi, I., Suzuki, A. (2017). Molecular basis of the microtubule-  
1096 regulating activity of microtubule crosslinking factor 1. *PLoS One* 12, e0182641 --  
1097 <https://doi.org/10.1371/journal.pone.0182641>
- 1098 Kalil, K., Dent, E. W. (2014). Branch management: mechanisms of axon branching in the developing  
1099 vertebrate CNS. *Nat Rev Neurosci* 15, 7-18 -- <http://www.ncbi.nlm.nih.gov/pubmed/24356070>
- 1100 Kandel, E. R., Schwartz, J. H., Jessell, T. M., Siegelbaum, S., Hudspeth, A. J. (2012). "Principles of neural  
1101 science (5<sup>th</sup> edition)." McGraw-Hill Publishing
- 1102 Kapur, M., Wang, W., Maloney, M. T., Millan, I., Lundin, V. F., Tran, T. A., Yang, Y. (2012). Calcium tips the  
1103 balance: a microtubule plus end to lattice binding switch operates in the carboxyl terminus of  
1104 BPAG1n4. *EMBO Rep* 13, 1021-9 -- <http://www.ncbi.nlm.nih.gov/pubmed/22995871>
- 1105 Karabay, A., Yu, W., Solowska, J. M., Baird, D. H., Baas, P. W. (2004). Axonal growth is sensitive to the  
1106 levels of katanin, a protein that severs microtubules. *J Neurosci* 24, 5778-88 --  
1107 [http://www.ncbi.nlm.nih.gov/entrez/query.fcgi?cmd=Retrieve&db=PubMed&dopt=Citation&list\\_uids=15](http://www.ncbi.nlm.nih.gov/entrez/query.fcgi?cmd=Retrieve&db=PubMed&dopt=Citation&list_uids=15215300)  
1108 [215300](http://www.ncbi.nlm.nih.gov/entrez/query.fcgi?cmd=Retrieve&db=PubMed&dopt=Citation&list_uids=15215300)
- 1109 Kawamura, R., Kakugo, A., Shikinaka, K., Osada, Y., Gong, J. P. (2008). Ring-Shaped Assembly of  
1110 Microtubules Shows Preferential Counterclockwise Motion. *Biomacromolecules* 9, 2277-2282 --  
1111 <http://dx.doi.org/10.1021/bm800639w>
- 1112 Kawamura, R., Kakugo, A., Shikinaka, K., Osada, Y., Gong, J. P. (2011). Formation of motile assembly of  
1113 microtubules driven by kinesins. *Smart Mater Struct* 20, 124007 -- [http://dx.doi.org/10.1088/0964-](http://dx.doi.org/10.1088/0964-1726/20/12/124007)  
1114 [1726/20/12/124007](http://dx.doi.org/10.1088/0964-1726/20/12/124007)
- 1115 Keating, T. J., Peloquin, J. G., Rodionov, V. I., Momcilovic, D., Borisy, G. G. (1997). Microtubule release  
1116 from the centrosome. *Proc Natl Acad Sci U S A* 94, 5078-83 --  
1117 <http://www.ncbi.nlm.nih.gov/pubmed/9144193>
- 1118 Kellogg, E. H., Hejab, N. M. A., Poepsel, S., Downing, K. H., DiMaio, F., Nogales, E. (2018). Near-atomic  
1119 model of microtubule-tau interactions. *Science* 360, 1242-1246 --  
1120 <http://science.sciencemag.org/content/sci/360/6394/1242.full.pdf>
- 1121 Koh, K., Ishiura, H., Tsuji, S., Takiyama, Y. (2018). JASPAC: Japan Spastic Paraplegia Research  
1122 Consortium. *Brain Sci* 8 -- <http://www.ncbi.nlm.nih.gov/pubmed/30104498>
- 1123 Kononova, O., Kholodov, Y., Theisen, K. E., Marx, K. A., Dima, R. I., Ataullakhanov, F. I., Grishchuk, E. L.,  
1124 Barsegov, V. (2014). Tubulin bond energies and microtubule biomechanics determined from  
1125 nanoindentation in silico. *J Am Chem Soc* 136, 17036-17045 -- <https://doi.org/10.1021/ja506385p>
- 1126 Koper, A., Schenck, A., Prokop, A. (2012). Analysis of adhesion molecules and basement membrane  
1127 contributions to synaptic adhesion at the *Drosophila* embryonic NMJ. *PLoS One* 7, e36339 --  
1128 <http://www.plosone.org/article/info%3Adoi%2F10.1371%2Fjournal.pone.0036339>
- 1129 Krebs, A., Goldie, K. N., Hoenger, A. (2004). Complex formation with kinesin motor domains affects the  
1130 structure of microtubules. *J Mol Biol* 335, 139-53 -- <http://www.ncbi.nlm.nih.gov/pubmed/14659746>
- 1131 Krendel, M., Mooseker, M. S. (2005). Myosins: tails (and heads) of functional diversity. *Physiology*  
1132 (*Bethesda*) 20, 239-51 -- <http://www.ncbi.nlm.nih.gov/pubmed/16024512>
- 1133 Krieg, M., Stühmer, J., Cueva, J. G., Fetter, R., Spilker, K., Cremers, D., Shen, K., Dunn, A. R., Goodman,  
1134 M. B. (2017). Genetic defects in  $\beta$ -spectrin and tau sensitize *C. elegans* axons to movement-induced  
1135 damage via torque-tension coupling. *Elife* 6, e20172 -- <https://doi.org/10.7554/eLife.20172>

- 1136 Kuijpers, M., van de Willige, D., Freal, A., Chazeau, A., Franker, Mariella A., Hofenk, J., Rodrigues,  
1137 Ricardo J. C., Kapitein, Lukas C., Akhmanova, A., Jaarsma, D., Hoogenraad, Casper C. (2016).  
1138 Dynein regulator NDEL1 controls polarized cargo transport at the axon initial segment. *Neuron* 89,  
1139 461-471 -- <http://www.sciencedirect.com/science/article/pii/S0896627316000477>
- 1140 Lacroix, B., van Dijk, J., Gold, N. D., Guizetti, J., Aldrian-Herrada, G., Rogowski, K., Gerlich, D. W., Janke,  
1141 C. (2010). Tubulin polyglutamylation stimulates spastin-mediated microtubule severing. *J Cell Biol*  
1142 189, 945-54 -- <http://www.ncbi.nlm.nih.gov/pubmed/20530212>
- 1143 Lam, A. T., Curschellas, C., Krovvidi, D., Hess, H. (2014). Controlling self-assembly of microtubule spools  
1144 via kinesin motor density. *Soft Matter* 10, 8731-8736 -- <http://dx.doi.org/10.1039/C4SM01518E>
- 1145 Lam, A. T., VanDelinder, V., Kabir, A. M. R., Hess, H., Bachand, G. D., Kakugo, A. (2016). Cytoskeletal  
1146 motor-driven active self-assembly in *in vitro* systems. *Soft Matter* 12, 988-997 --  
1147 <http://dx.doi.org/10.1039/C5SM02042E>
- 1148 Lamoureux, P., Heidemann, S. R., Martzke, N. R., Miller, K. E. (2010). Growth and elongation within and  
1149 along the axon. *Dev Neurobiol* 70, 135-49 --  
1150 [http://www.ncbi.nlm.nih.gov/entrez/query.fcgi?cmd=Retrieve&db=PubMed&dopt=Citation&list\\_uids=19](http://www.ncbi.nlm.nih.gov/entrez/query.fcgi?cmd=Retrieve&db=PubMed&dopt=Citation&list_uids=19950193)  
1151 [950193](http://www.ncbi.nlm.nih.gov/entrez/query.fcgi?cmd=Retrieve&db=PubMed&dopt=Citation&list_uids=19950193)
- 1152 Langford, G. M. (1980). Arrangement of subunits in microtubules with 14 protofilaments. *J Cell Biol* 87, 521-6  
1153 -- <http://www.ncbi.nlm.nih.gov/pubmed/7430256>
- 1154 Lansky, Z., Braun, M., Lüdecke, A., Schlierf, M., ten Wolde, Pieter R., Janson, Marcel E., Diez, S. (2015).  
1155 Diffusible crosslinkers generate directed forces in microtubule networks. *Cell* 160, 1159-68 --  
1156 [http://www.cell.com/cell/abstract/S0092-8674\(15\)00129-4](http://www.cell.com/cell/abstract/S0092-8674(15)00129-4)
- 1157 Lazarus, C., Soheilypour, M., Mofrad, Mohammad R. K. (2015). Torsional behavior of axonal microtubule  
1158 bundles. *Biophys J* 109, 231-239 --  
1159 <http://www.sciencedirect.com/science/article/pii/S0006349515006128>
- 1160 Lazarus, J. E., Moughamian, A. J., Tokito, M. K., Holzbaur, E. L. (2013). Dynactin subunit p150(Glued) is a  
1161 neuron-specific anti-catastrophe factor. *PLoS Biol* 11, e1001611 --  
1162 <http://www.ncbi.nlm.nih.gov/pubmed/23874158>
- 1163 Lee, G., Brandt, R. (1992). Microtubule bundling studies revisited: is there a role for MAPs? *Trends in Cell*  
1164 *Biology* 2, 286-289 -- <http://www.sciencedirect.com/science/article/pii/096289249290106W>
- 1165 Leo, L., Yu, W., D'Rozario, M., Waddell, E. A., Marena, D. R., Baird, M. A., Davidson, M. W., Zhou, B.,  
1166 Wu, B., Baker, L., Sharp, D. J., Baas, P. W. (2015). Vertebrate fidgetin restrains axonal growth by  
1167 severing labile domains of microtubules. *Cell Rep* 12, 1723-30 --  
1168 <http://dx.doi.org/10.1016/j.celrep.2015.08.017>
- 1169 Leterrier, C. (2018). The axon initial segment: an updated viewpoint. *J Neurosci* 38, 2135-2145 --  
1170 <http://www.jneurosci.org/content/jneuro/38/9/2135.full.pdf>
- 1171 Leterrier, C., Dubey, P., Roy, S. (2017). The nano-architecture of the axonal cytoskeleton. *Nature Reviews*  
1172 *Neuroscience* 18, 713-726 -- <http://dx.doi.org/10.1038/nrn.2017.129>
- 1173 Letourneau, P. C., Shattuck, T. A., Ressler, A. H. (1987). "Pull" and "push" in neurite elongation:  
1174 observations on the effects of different concentrations of cytochalasin B and taxol. *Cell Motil*  
1175 *Cytoskeleton* 8, 193-209 --  
1176 [http://www.ncbi.nlm.nih.gov/entrez/query.fcgi?cmd=Retrieve&db=PubMed&dopt=Citation&list\\_uids=28](http://www.ncbi.nlm.nih.gov/entrez/query.fcgi?cmd=Retrieve&db=PubMed&dopt=Citation&list_uids=2891448)  
1177 [91448](http://www.ncbi.nlm.nih.gov/entrez/query.fcgi?cmd=Retrieve&db=PubMed&dopt=Citation&list_uids=2891448)
- 1178 Li, S., Wang, C., Nithiarasu, P. (2018). Effects of the cross-linkers on the buckling of microtubules in cells. *J*  
1179 *Biomech Eng* -- <http://www.sciencedirect.com/science/article/pii/S0021929018301544>
- 1180 Lin, S., Liu, M., Mozgova, O. I., Yu, W., Baas, P. W. (2012). Mitotic motors coregulate microtubule patterns  
1181 in axons and dendrites. *J Neurosci* 32, 14033-49 -- <http://www.ncbi.nlm.nih.gov/pubmed/23035110>
- 1182 Liu, H., Bachand, G. D. (2013). Effects of Confinement on Molecular Motor-Driven Self-Assembly of Ring  
1183 Structures. *Cellular and Molecular Bioengineering* 6, 98-108 -- [https://doi.org/10.1007/s12195-012-](https://doi.org/10.1007/s12195-012-0256-5)  
1184 [0256-5](https://doi.org/10.1007/s12195-012-0256-5)
- 1185 Liu, H., Spoerke, E. D., Bachand, M., Koch, S. J., Bunker, B. C., Bachand, G. D. (2008). Biomolecular  
1186 Motor-Powered Self-Assembly of Dissipative Nanocomposite Rings. *Advanced Materials* 20, 4476-  
1187 4481 -- <https://onlinelibrary.wiley.com/doi/abs/10.1002/adma.200801291>
- 1188 Liu, L., Tuzel, E., Ross, J. L. (2011). Loop formation of microtubules during gliding at high density. *J Phys*  
1189 *Condens Matter* 23, 374104 -- <http://www.ncbi.nlm.nih.gov/pubmed/21862840>

- 1190 Liu, M., Nadar, V. C., Kozielski, F., Kozłowska, M., Yu, W., Baas, P. W. (2010). Kinesin-12, a mitotic  
1191 microtubule-associated motor protein, impacts axonal growth, navigation, and branching. *J Neurosci*  
1192 30, 14896-906 --  
1193 [http://www.ncbi.nlm.nih.gov/entrez/query.fcgi?cmd=Retrieve&db=PubMed&dopt=Citation&list\\_uids=21](http://www.ncbi.nlm.nih.gov/entrez/query.fcgi?cmd=Retrieve&db=PubMed&dopt=Citation&list_uids=21048148)  
1194 [048148](http://www.ncbi.nlm.nih.gov/entrez/query.fcgi?cmd=Retrieve&db=PubMed&dopt=Citation&list_uids=21048148)
- 1195 Liu, Z., Zhou, T., Ziegler, A. C., Dimitrion, P., Zuo, L. (2017). Oxidative Stress in Neurodegenerative  
1196 Diseases: From Molecular Mechanisms to Clinical Applications. *Oxid Med Cell Longev* 2017, 2525967  
1197 -- <http://www.ncbi.nlm.nih.gov/pubmed/28785371>
- 1198 Lu, W., Fox, P., Lakonishok, M., Davidson, Michael W., Gelfand, Vladimir I. (2013). Initial neurite outgrowth  
1199 in *Drosophila* neurons is driven by Kinesin-powered microtubule sliding. *Current Biology* 23, 1018-  
1200 1023 -- <http://www.sciencedirect.com/science/article/pii/S0960982213004910>
- 1201 Lu, W., Gelfand, V. I. (2017). Moonlighting Motors: Kinesin, Dynein, and Cell Polarity. *Trends Cell Biol* --  
1202 <http://www.ncbi.nlm.nih.gov/pubmed/28284467>
- 1203 Luria, I., Crenshaw, J., Downs, M., Agarwal, A., Seshadri, S. B., Gonzales, J., Idan, O., Kamcev, J., Katira,  
1204 P., Pandey, S., Nitta, T., Phillpot, S. R., Hess, H. (2011). Microtubule nanospool formation by active  
1205 self-assembly is not initiated by thermal activation. *Soft Matter* 7, 3108-3115 --  
1206 <http://dx.doi.org/10.1039/C0SM00802H>
- 1207 Maas, T., Eidenmuller, J., Brandt, R. (2000). Interaction of tau with the neural membrane cortex is  
1208 regulated by phosphorylation at sites that are modified in paired helical filaments. *J. Biol. Chem.* 275,  
1209 15733-40 -- <http://www.jbc.org/manchester.idm.oclc.org/content/275/21/15733>
- 1210 Machin, N. A., Lee, J. M., Barnes, G. (1995). Microtubule stability in budding yeast: characterization and  
1211 dosage suppression of a benomyl-dependent tubulin mutant. *Mol Biol Cell* 6, 1241-1259 --  
1212 <https://www.molbiolcell.org/doi/abs/10.1091/mbc.6.9.1241>
- 1213 Mao, C.-X., Xiong, Y., Xiong, Z., Wang, Q., Zhang, Y. Q., Jin, S. (2014). Microtubule-severing protein  
1214 Katanin regulates neuromuscular junction development and dendritic elaboration in *Drosophila*.  
1215 *Development* 141, 1064-1074 -- <http://dev.biologists.org/content/141/5/1064.abstract>
- 1216 Marner, L., Nyengaard, J. R., Tang, Y., Pakkenberg, B. (2003). Marked loss of myelinated nerve fibers in  
1217 the human brain with age. *J Comp Neurol* 462, 144-52 --  
1218 <http://www.ncbi.nlm.nih.gov/pubmed/12794739>
- 1219 McBride, H. M., Neuspiel, M., Wasiak, S. (2006). Mitochondria: more than just a powerhouse. *Curr Biol* 16,  
1220 R551-60 -- <http://www.ncbi.nlm.nih.gov/pubmed/16860735>
- 1221 McNally, F. J., Roll-Mecak, A. (2018). Microtubule-severing enzymes: From cellular functions to molecular  
1222 mechanism. *J Cell Biol* 217, 4057-69 -- <http://jcb.rupress.org/content/early/2018/10/31/jcb.201612104>
- 1223 McVicker, D. P., Millette, M. M., Dent, E. W. (2015). Signaling to the microtubule cytoskeleton: an  
1224 unconventional role for CaMKII. *Dev Neurobiol* 75, 423-34 --  
1225 <http://www.ncbi.nlm.nih.gov/pubmed/25156276>
- 1226 Medana, I. M., Esiri, M. M. (2003). Axonal damage: a key predictor of outcome in human CNS diseases.  
1227 *Brain* 126, 515-30 -- <http://www.ncbi.nlm.nih.gov/pubmed/12566274>
- 1228 Memet, E., Hilitski, F., Morris, M. A., Schwenger, W. J., Dogic, Z., Mahadevan, L. (2018). Microtubules  
1229 soften due to cross-sectional flattening. *Elife* 7 -- <http://www.ncbi.nlm.nih.gov/pubmed/29856317>
- 1230 Méphon-Gaspard, A., Boca, M., Pioche-Durieu, C., Desforges, B., Burgo, A., Hamon, L., Piétrement, O.,  
1231 Pastré, D. (2016). Role of tau in the spatial organization of axonal microtubules: keeping parallel  
1232 microtubules evenly distributed despite macromolecular crowding. *Cell Mol Life Sci* 73, 3745-3760 --  
1233 <https://www.ncbi.nlm.nih.gov/pubmed/27076215>
- 1234 Miller, K. E., Sheetz, M. P. (2006). Direct evidence for coherent low velocity axonal transport of  
1235 mitochondria. *J Cell Biol* 173, 373-81 -- <http://www.ncbi.nlm.nih.gov/pubmed/16682527>
- 1236 Mohan, R., John, A. (2015). Microtubule-associated proteins as direct crosslinkers of actin filaments and  
1237 microtubules. *IUBMB Life* 67, 395-403 --  
1238 <https://iubmb.onlinelibrary.wiley.com/doi/abs/10.1002/iub.1384>
- 1239 Monroy, B. Y., Sawyer, D. L., Ackermann, B. E., Borden, M. M., Tan, T. C., Ori-McKenney, K. M. (2018).  
1240 Competition between microtubule-associated proteins directs motor transport. *Nat Commun* 9, 1487 --  
1241 <https://doi.org/10.1038/s41467-018-03909-2>
- 1242 Morikawa, M., Yajima, H., Nitta, R., Inoue, S., Ogura, T., Sato, C., Hirokawa, N. (2015). X-ray and Cryo-EM  
1243 structures reveal mutual conformational changes of Kinesin and GTP-state microtubules upon binding.  
1244 *EMBO J* 34, 1270-86 -- <http://www.ncbi.nlm.nih.gov/pubmed/25777528>

- 1245 Muto, E., Sakai, H., Kaseda, K. (2005). Long-range cooperative binding of kinesin to a microtubule in the  
1246 presence of ATP. *J Cell Biol* 168, 691-6 -- <http://www.ncbi.nlm.nih.gov/pubmed/15738263>
- 1247 Myers, K. A., Baas, P. W. (2007). Kinesin-5 regulates the growth of the axon by acting as a brake on its  
1248 microtubule array. *J Cell Biol* 178, 1081-91 -- <http://www.ncbi.nlm.nih.gov/pubmed/17846176>
- 1249 Myers, K. A., He, Y., Hasaka, T. P., Baas, P. W. (2006). Microtubule transport in the axon: Re-thinking a  
1250 potential role for the actin cytoskeleton. *Neuroscientist* 12, 107-18 --  
1251 [http://www.ncbi.nlm.nih.gov/entrez/query.fcgi?cmd=Retrieve&db=PubMed&dopt=Citation&list\\_uids=16](http://www.ncbi.nlm.nih.gov/entrez/query.fcgi?cmd=Retrieve&db=PubMed&dopt=Citation&list_uids=16514008)  
1252 [514008](http://www.ncbi.nlm.nih.gov/entrez/query.fcgi?cmd=Retrieve&db=PubMed&dopt=Citation&list_uids=16514008)
- 1253 Nadar, V. C., Lin, S., Baas, P. W. (2012). Microtubule redistribution in growth cones elicited by focal  
1254 inactivation of kinesin-5. *J Neurosci* 32, 5783-94 -- <http://www.ncbi.nlm.nih.gov/pubmed/22539840>
- 1255 Nashchekin, D., Fernandes, Artur R., St Johnston, D. (2016). Patronin/Shot cortical foci assemble the  
1256 noncentrosomal microtubule array that specifies the *Drosophila* anterior-posterior axis. *Dev Cell* 38,  
1257 61-72 -- <http://dx.doi.org/10.1016/j.devcel.2016.06.010>
- 1258 Nguyen, M. D., Lariviere, R. C., Julien, J. P. (2000). Reduction of axonal caliber does not alleviate motor  
1259 neuron disease caused by mutant superoxide dismutase 1. *Proc Natl Acad Sci U S A* 97, 12306-11 --  
1260 <http://www.ncbi.nlm.nih.gov/pubmed/11050249>
- 1261 Ning, W., Yu, Y., Xu, H., Liu, X., Wang, D., Wang, J., Wang, Y., Meng, W. (2016). The CAMSAP3-ACF7  
1262 complex couples noncentrosomal microtubules with actin filaments to coordinate their dynamics. *Dev*  
1263 *Cell* 39, 61-74 -- <http://www.sciencedirect.com/science/article/pii/S1534580716305998>
- 1264 Nogales, E., Wolf, S. G., Khan, I. A., Luduena, R. F., Downing, K. H. (1995). Structure of tubulin at 6.5 Å  
1265 and location of the taxol-binding site. *Nature* 375, 424-7 -- <https://www.nature.com/articles/375424a0>
- 1266 Noordstra, I., Liu, Q., Nijenhuis, W., Hua, S., Jiang, K., Baars, M., Rimmelzwaal, S., Martin, M., Kapitein,  
1267 L. C., Akhmanova, A. (2016). Control of apico-basal epithelial polarity by the microtubule minus-end-  
1268 binding protein CAMSAP3 and spectraplakins ACF7. *J Cell Sci* 129, 4278-4288 --  
1269 <http://www.ncbi.nlm.nih.gov/pubmed/27802168>
- 1270 O'Brien, E. T., Salmon, E. D., Erickson, H. P. (1997). How calcium causes microtubule depolymerization.  
1271 *Cell Motility* 36, 125-135 -- [https://onlinelibrary.wiley.com/doi/abs/10.1002/%28SICI%291097-](https://onlinelibrary.wiley.com/doi/abs/10.1002/%28SICI%291097-0169%281997%2936%3A2%3C125%3A%3AAID-CM3%3E3.0.CO%3B2-8)  
1272 [0169%281997%2936%3A2%3C125%3A%3AAID-CM3%3E3.0.CO%3B2-8](https://onlinelibrary.wiley.com/doi/abs/10.1002/%28SICI%291097-0169%281997%2936%3A2%3C125%3A%3AAID-CM3%3E3.0.CO%3B2-8)
- 1273 O'Toole, M., Lamoureux, P., Miller, K. E. (2008). A physical model of axonal elongation: force, viscosity,  
1274 and adhesions govern the mode of outgrowth. *Biophys J* 94, 2610-20 --  
1275 <http://www.ncbi.nlm.nih.gov/pubmed/18178646>
- 1276 O'Toole, M., Lamoureux, P., Miller, Kyle E. (2015). Measurement of subcellular force generation in  
1277 neurons. *Biophys J* 108, 1027-1037 --  
1278 <http://www.sciencedirect.com/science/article/pii/S0006349515001150>
- 1279 Odde, D. J., Ma, L., Briggs, A. H., DeMarco, A., Kirschner, M. W. (1999). Microtubule bending and breaking  
1280 in living fibroblast cells. *J Cell Sci* 112, 3283-3288 --  
1281 <http://jcs.biologists.org/content/joces/112/19/3283.full.pdf>
- 1282 Pan, S., Chan, J. R. (2017). Regulation and dysregulation of axon infrastructure by myelinating glia.  
1283 *Journal Cell Biol* 216, 3903-3916 -- <http://jcb.rupress.org/content/jcb/216/12/3903.full.pdf>
- 1284 Papadopoulos, C., Orso, G., Mancuso, G., Herholz, M., Gumeni, S., Tadepalle, N., Jungst, C.,  
1285 Tzschichholz, A., Schauss, A., Honing, S., Trifunovic, A., Daga, A., Rugarli, E. I. (2015). Spastin binds  
1286 to lipid droplets and affects lipid metabolism. *PLoS Genet* 11, e1005149 --  
1287 <http://www.ncbi.nlm.nih.gov/pubmed/25875445>
- 1288 Park, J. H., Roll-Mecak, A. (2018). The tubulin code in neuronal polarity. *Curr Opin Neurobiol* 51, 95-102 --  
1289 <http://www.ncbi.nlm.nih.gov/pubmed/29554585>
- 1290 Park, S. H., Zhu, P. P., Parker, R. L., Blackstone, C. (2010). Hereditary spastic paraplegia proteins REEP1,  
1291 spastin, and atlastin-1 coordinate microtubule interactions with the tubular ER network. *J Clin Invest*  
1292 120, 1097-110 -- <https://www.jci.org/articles/view/40979>
- 1293 Pascual-Ahuir, A., Manzanares-Estreded, S., Proft, M. (2017). Pro- and antioxidant functions of the  
1294 peroxisome-mitochondria connection and its impact on aging and disease. *Oxid Med Cell Longev*  
1295 2017, 9860841 -- <http://www.ncbi.nlm.nih.gov/pubmed/28811869>
- 1296 Pearce, S. P., Heil, M., Jensen, O. E., Jones, G. W., Prokop, A. (2018). Curvature-sensitive kinesin binding  
1297 can explain microtubule ring formation and reveals chaotic dynamics in a mathematical model. *Bull*  
1298 *Math Biol* 80, 3002-22 -- <https://tinyurl.com/yd43ncb9>

- 1299 Peet, D. R., Burroughs, N. J., Cross, R. A. (2018). Kinesin expands and stabilizes the GDP-microtubule  
1300 lattice. *Nat Nanotechnol* 13, 386-391 -- [https://www-nature-](https://www-nature-com.manchester.idm.oclc.org/articles/s41565-018-0084-4)  
1301 [com.manchester.idm.oclc.org/articles/s41565-018-0084-4](https://www-nature-com.manchester.idm.oclc.org/articles/s41565-018-0084-4)
- 1302 Penazzi, L., Bakota, L., Brandt, R. (2016). Microtubule dynamics in neuronal development, plasticity, and  
1303 neurodegeneration. *Int Rev Cell Mol Biol* 321, 89-169 --  
1304 <http://www.ncbi.nlm.nih.gov/pubmed/26811287>
- 1305 Perrot, R., Berges, R., Bocquet, A., Eyer, J. (2008). Review of the multiple aspects of neurofilament  
1306 functions, and their possible contribution to neurodegeneration. *Mol Neurobiol* 38, 27-65 --  
1307 <http://www.ncbi.nlm.nih.gov/pubmed/18649148>
- 1308 Peter, S. J., Mofrad, M. R. (2012). Computational modeling of axonal microtubule bundles under tension.  
1309 *Biophys J* 102, 749-57 -- <https://www.ncbi.nlm.nih.gov/pubmed/22385845>
- 1310 Pfenninger, K. H. (2009). Plasma membrane expansion: a neuron's Herculean task. *Nat Rev Neurosci* 10,  
1311 251-61 -- <http://www.ncbi.nlm.nih.gov/pubmed/19259102>
- 1312 Pines, M. K., Housden, B. E., Bernard, F., Bray, S. J., Roper, K. (2010). The cytolinker Pigs is a direct  
1313 target and a negative regulator of Notch signalling. *Development* 137, 913-22 --  
1314 [http://www.ncbi.nlm.nih.gov/entrez/query.fcgi?cmd=Retrieve&db=PubMed&dopt=Citation&list\\_uids=20](http://www.ncbi.nlm.nih.gov/entrez/query.fcgi?cmd=Retrieve&db=PubMed&dopt=Citation&list_uids=20150280)  
1315 [150280](http://www.ncbi.nlm.nih.gov/entrez/query.fcgi?cmd=Retrieve&db=PubMed&dopt=Citation&list_uids=20150280)
- 1316 Popov, S., Brown, A., Poo, M. M. (1993). Forward plasma membrane flow in growing nerve processes.  
1317 *Science* 259, 244-6 -- <http://www.ncbi.nlm.nih.gov/pubmed/7678471>
- 1318 Preitner, N., Quan, J., Nowakowski, Dan W., Hancock, Melissa L., Shi, J., Tcherkezian, J., Young-Pearse,  
1319 Tracy L., Flanagan, John G. (2014). APC is an RNA-binding protein, and its interactome provides a  
1320 link to neural development and microtubule assembly. *Cell* 158, 368-382 --  
1321 <http://www.sciencedirect.com/science/article/pii/S0092867414007478>
- 1322 Prezel, E., Elie, A., Delaroche, J., Stoppin-Mellet, V., Bosc, C., Serre, L., Fourest-Lieuvain, A., Andrieux, A.,  
1323 Vantard, M., Arnal, I., Zhu, X. (2018). Tau can switch microtubule network organizations: from random  
1324 networks to dynamic and stable bundles. *Molecular Biology of the Cell* 29, 154-165 --  
1325 <https://www.molbiolcell.org/doi/abs/10.1091/mbc.E17-06-0429>
- 1326 Prior, R., Van Helleputte, L., Benoy, V., Van Den Bosch, L. (2017). Defective axonal transport: A common  
1327 pathological mechanism in inherited and acquired peripheral neuropathies. *Neurobiol Dis* 105, 300-  
1328 320 -- <http://www.ncbi.nlm.nih.gov/pubmed/28238949>
- 1329 Prokop, A. (2013). The intricate relationship between microtubules and their associated motor proteins  
1330 during axon growth and maintenance. *Neur Dev* 8, 17 --  
1331 <http://www.neuraldevelopment.com/content/8/1/17>
- 1332 Prokop, A. (2016). Fruit flies in biological research. *Biological Sciences Review* 28, 10-14 --  
1333 <https://tinyurl.com/ybvpoqmw>
- 1334 Prokop, A. (2018). Why funding fruit fly research is important for the biomedical sciences. *Open Access*  
1335 *Govern* 20, 198-201 -- <https://tinyurl.com/y7b25jpm>
- 1336 Prokop, A., Beaven, R., Qu, Y., Sánchez-Soriano, N. (2013). Using fly genetics to dissect the cytoskeletal  
1337 machinery of neurons during axonal growth and maintenance. *J. Cell Sci.* 126, 2331-41 --  
1338 <http://dx.doi.org/10.1242/jcs.126912>
- 1339 Prokop, A., Küppers-Munther, B., Sánchez-Soriano, N. (2012). Using primary neuron cultures of *Drosophila*  
1340 to analyse neuronal circuit formation and function. In "The making and un-making of neuronal circuits  
1341 in *Drosophila*" (B. A. Hassan, Ed.), Vol. 69, pp. 225-47. Humana Press, New York --  
1342 [http://dx.doi.org/10.1007/978-1-61779-830-6\\_10](http://dx.doi.org/10.1007/978-1-61779-830-6_10)
- 1343 Prokop, A., Uhler, J., Roote, J., Bate, M. C. (1998). The *kakapo* mutation affects terminal arborisation and  
1344 central dendritic sprouting of *Drosophila* motoneurons. *J. Cell Biol.* 143, 1283-1294 --  
1345 <http://jcb.rupress.org/content/143/5/1283.long>
- 1346 Pronker, M. F., Lemstra, S., Snijder, J., Heck, A. J. R., Thies-Weesie, D. M. E., Pasterkamp, R. J.,  
1347 Janssen, B. J. C. (2016). Structural basis of myelin-associated glycoprotein adhesion and signalling.  
1348 *Nature Communications* 7, 13584 -- <https://doi.org/10.1038/ncomms13584>
- 1349 Qiang, L., Sun, X., Austin, T. O., Muralidharan, H., Jean, D. C., Liu, M., Yu, W., Baas, P. W. (2018). Tau  
1350 does not stabilize axonal microtubules but rather enables them to have long labile domains. *Curr Biol*  
1351 28, 2181-2189 e4 -- <http://www.ncbi.nlm.nih.gov/pubmed/30008334>
- 1352 Qiang, L., Yu, W., Andreadis, A., Luo, M., Baas, P. W. (2006). Tau protects microtubules in the axon from  
1353 severing by katanin. *J Neurosci* 26, 3120-9 --

- 1354 [http://www.ncbi.nlm.nih.gov/entrez/query.fcgi?cmd=Retrieve&db=PubMed&dopt=Citation&list\\_uids=16](http://www.ncbi.nlm.nih.gov/entrez/query.fcgi?cmd=Retrieve&db=PubMed&dopt=Citation&list_uids=16)  
1355 [554463](http://www.ncbi.nlm.nih.gov/entrez/query.fcgi?cmd=Retrieve&db=PubMed&dopt=Citation&list_uids=16)
- 1356 Qu, Y., Hahn, I., Lees, M., Parkin, J., Voelzmann, A., Dorey, K., Rathbone, A., Friel, C., Allan, V., Okenve  
1357 Ramos, P., Sánchez-Soriano, N., Prokop, A. (2018). Efa6 regulates axon growth, branching and  
1358 maintenance by eliminating off-track microtubules at the cortex. *bioRxiv* 10.1101/385658 --  
1359 <https://www.biorxiv.org/content/early/2018/09/03/385658>
- 1360 Qu, Y., Hahn, I., Webb, S. E. D., Pearce, S. P., Prokop, A. (2017). Periodic actin structures in neuronal  
1361 axons are required to maintain microtubules. *Mol Biol Cell* 28 296-308 --  
1362 <http://www.molbiolcell.org/content/early/2016/11/21/mbc.E16-10-0727>
- 1363 Rajendran, L., Bali, J., Barr, M. M., Court, F. A., Kramer-Albers, E. M., Picou, F., Raposo, G., van der Vos,  
1364 K. E., van Niel, G., Wang, J., Breakefield, X. O. (2014). Emerging roles of extracellular vesicles in the  
1365 nervous system. *J Neurosci* 34, 15482-9 -- <http://www.ncbi.nlm.nih.gov/pubmed/25392515>
- 1366 Rao, M. V., Campbell, J., Yuan, A., Kumar, A., Gotow, T., Uchiyama, Y., Nixon, R. A. (2003). The  
1367 neurofilament middle molecular mass subunit carboxyl-terminal tail domains is essential for the radial  
1368 growth and cytoskeletal architecture of axons but not for regulating neurofilament transport rate. *J Cell*  
1369 *Biol* 163, 1021-31 -- <http://www.ncbi.nlm.nih.gov/pubmed/14662746>
- 1370 Rashedul Kabir, A. M., Wada, S., Inoue, D., Tamura, Y., Kajihara, T., Mayama, H., Sada, K., Kakugo, A.,  
1371 Gong, J. P. (2012). Formation of ring-shaped assembly of microtubules with a narrow size distribution  
1372 at an air-buffer interface. *Soft Matter* 8, 10863-10867 -- <http://dx.doi.org/10.1039/C2SM26441B>
- 1373 Ray, S., Meyhofer, E., Milligan, R. A., Howard, J. (1993). Kinesin follows the microtubule's protofilament  
1374 axis. *J Cell Biol* 121, 1083-93 -- <http://www.ncbi.nlm.nih.gov/pubmed/8099076>
- 1375 Reinsch, S. S., Mitchison, T. J., Kirschner, M. (1991). Microtubule polymer assembly and transport during  
1376 axonal elongation. *J Cell Biol* 115, 365-79 -- <http://www.ncbi.nlm.nih.gov/pubmed/1717484>
- 1377 Riancho, J., Gonzalo, I., Ruiz-Soto, M., Berciano, J. (2019). Why do motor neurons degenerate?  
1378 Actualization in the pathogenesis of amyotrophic lateral sclerosis. *Neurología* 34, 27-37 --  
1379 [http://www.elsevier.es/en-revista-neurologia-english-edition--495-articulo-why-do-motor-neurons-](http://www.elsevier.es/en-revista-neurologia-english-edition--495-articulo-why-do-motor-neurons-degenerate-S2173580817301633)  
1380 [degenerate-S2173580817301633](http://www.elsevier.es/en-revista-neurologia-english-edition--495-articulo-why-do-motor-neurons-degenerate-S2173580817301633)
- 1381 Riano, E., Martignoni, M., Mancuso, G., Cartelli, D., Crippa, F., Toldo, I., Siciliano, G., Di Bella, D., Taroni,  
1382 F., Bassi, M. T., Cappelletti, G., Rugarli, E. I. (2009). Pleiotropic effects of spastin on neurite growth  
1383 depending on expression levels. *J Neurochem* 108, 1277-88 -- [https://doi-](https://doi.org/manchester.idm.oclc.org/10.1111/j.1471-4159.2009.05875.x)  
1384 [org.manchester.idm.oclc.org/10.1111/j.1471-4159.2009.05875.x](https://doi.org/manchester.idm.oclc.org/10.1111/j.1471-4159.2009.05875.x)
- 1385 Rieusset, J. (2017). Endoplasmic reticulum-mitochondria calcium signaling in hepatic metabolic diseases.  
1386 *Biochim Biophys Acta Mol Cell Res* 1864, 865-876 -- <http://www.ncbi.nlm.nih.gov/pubmed/28064001>
- 1387 Roos, J., Hummel, T., Ng, N., Klämbt, C., Davis, G. W. (2000). *Drosophila* Futsch regulates synaptic  
1388 microtubule organisation and is necessary for synaptic growth. *Neuron* 26, 371-382 --  
1389 [http://www.ncbi.nlm.nih.gov/entrez/query.fcgi?cmd=Retrieve&db=PubMed&dopt=Citation&list\\_uids=10](http://www.ncbi.nlm.nih.gov/entrez/query.fcgi?cmd=Retrieve&db=PubMed&dopt=Citation&list_uids=10)  
1390 [839356](http://www.ncbi.nlm.nih.gov/entrez/query.fcgi?cmd=Retrieve&db=PubMed&dopt=Citation&list_uids=10)
- 1391 Roossien, D. H., Lamoureux, P., Miller, K. E. (2014). Cytoplasmic dynein pushes the cytoskeletal  
1392 meshwork forward during axonal elongation. *J Cell Sci* 127, 3593-602 --  
1393 <http://www.ncbi.nlm.nih.gov/pubmed/24951117>
- 1394 Roossien, D. H., Lamoureux, P., Van Vactor, D., Miller, K. E. (2013). *Drosophila* growth cones advance by  
1395 forward translocation of the neuronal cytoskeletal meshwork *in vivo*. *PLoS One* 8, e80136 --  
1396 <http://www.ncbi.nlm.nih.gov/pubmed/24244629>
- 1397 Roote, J., Prokop, A. (2013). How to design a genetic mating scheme: a basic training package for  
1398 *Drosophila* genetics. *G3 (Bethesda)* 3, 353-8 -- <http://www.g3journal.org/content/3/2/353.full>
- 1399 Rosenberg, K. J., Ross, J. L., Feinstein, H. E., Feinstein, S. C., Israelachvili, J. (2008). Complementary  
1400 dimerization of microtubule-associated tau protein: Implications for microtubule bundling and tau-  
1401 mediated pathogenesis. *Proc Natl Acad Sci U S A* 105, 7445-50 --  
1402 <http://www.ncbi.nlm.nih.gov/pubmed/18495933>
- 1403 Sakaguchi, T., Okada, M., Kitamura, T., Kawasaki, K. (1993). Reduced diameter and conduction velocity of  
1404 myelinated fibers in the sciatic nerve of a neurofilament-deficient mutant quail. *Neurosci Lett* 153, 65-8  
1405 -- <http://www.ncbi.nlm.nih.gov/pubmed/8510825>
- 1406 Sakakibara, A., Ando, R., Sapir, T., Tanaka, T. (2013). Microtubule dynamics in neuronal morphogenesis.  
1407 *Open Biology* 3, 130061 -- <https://royalsocietypublishing.org/doi/abs/10.1098/rsob.130061>

- 1408 Salvadores, N., Sanhueza, M., Manque, P., Court, F. A. (2017). Axonal degeneration during aging and its  
1409 functional role in neurodegenerative disorders. *Front Neurosci* 11 --  
1410 <https://www.frontiersin.org/article/10.3389/fnins.2017.00451>
- 1411 Samsonov, A., Yu, J. Z., Rasenick, M., Popov, S. V. (2004). Tau interaction with microtubules *in vivo*. *J Cell*  
1412 *Sci* 117, 6129-41 -- <http://www.ncbi.nlm.nih.gov/pubmed/15564376>
- 1413 Sánchez-Soriano, N., Gonçalves-Pimentel, C., Beaven, R., Haessler, U., Ofner, L., Ballestrem, C., Prokop,  
1414 A. (2010). *Drosophila* growth cones: a genetically tractable platform for the analysis of axonal growth  
1415 dynamics. *Dev. Neurobiol.* 70, 58-71 -- <https://onlinelibrary.wiley.com/doi/abs/10.1002/dneu.20762>
- 1416 Sánchez-Soriano, N., Tear, G., Whittington, P., Prokop, A. (2007). *Drosophila* as a genetic and cellular  
1417 model for studies on axonal growth. *Neural Develop* 2, 9 --  
1418 [http://www.ncbi.nlm.nih.gov/entrez/query.fcgi?cmd=Retrieve&db=PubMed&dopt=Citation&list\\_uids=17](http://www.ncbi.nlm.nih.gov/entrez/query.fcgi?cmd=Retrieve&db=PubMed&dopt=Citation&list_uids=17475018)  
1419 [475018](http://www.ncbi.nlm.nih.gov/entrez/query.fcgi?cmd=Retrieve&db=PubMed&dopt=Citation&list_uids=17475018)
- 1420 Sánchez-Soriano, N., Travis, M., Dajas-Bailador, F., Goncalves-Pimentel, C., Whitmarsh, A. J., Prokop, A.  
1421 (2009). Mouse ACF7 and *Drosophila* Short stop modulate filopodia formation and microtubule  
1422 organisation during neuronal growth. *J Cell Sci* 122, 2534-42 --  
1423 <http://jcs.biologists.org/content/122/14/2534.long>
- 1424 Satake, T., Yamashita, K., Hayashi, K., Miyatake, S., Tamura-Nakano, M., Doi, H., Furuta, Y., Shioi, G.,  
1425 Miura, E., Takeo, Y. H., Yoshida, K., Yahikozawa, H., Matsumoto, N., Yuzaki, M., Suzuki, A. (2017).  
1426 MTCL1 plays an essential role in maintaining Purkinje neuron axon initial segment. *EMBO J* 36, 1227-  
1427 1242 -- <http://emboj.embopress.org/content/embojnl/36/9/1227.full.pdf>
- 1428 Savage, C., Hamelin, M., Culotti, J. G., Coulson, A., Albertson, D. G., Chalfie, M. (1989). *mec-7* is a beta-  
1429 tubulin gene required for the production of 15-protofilament microtubules in *Caenorhabditis elegans*.  
1430 *Genes Dev* 3, 870-81 -- <http://www.ncbi.nlm.nih.gov/pubmed/2744465>
- 1431 Saxton, W. M., Hollenbeck, P. J. (2012). The axonal transport of mitochondria. *J Cell Sci* 125, 2095-104 --  
1432 <http://www.ncbi.nlm.nih.gov/pubmed/22619228>
- 1433 Sayas, C. L., Tortosa, E., Bollati, F., Ramirez-Rios, S., Arnal, I., Avila, J. (2015). Tau regulates the  
1434 localization and function of End-binding proteins 1 and 3 in developing neuronal cells. *J Neurochem*  
1435 133, 653-67 -- <http://www.ncbi.nlm.nih.gov/pubmed/25761518>
- 1436 Scaife, R., Margolis, R. L. (1990). Biochemical and immunochemical analysis of rat brain dynamin  
1437 interaction with microtubules and organelles *in vivo* and *in vitro*. *J Cell Biol* 111, 3023-33 --  
1438 <http://www.ncbi.nlm.nih.gov/pubmed/2148566>
- 1439 Schelski, M., Bradke, F. (2017). Neuronal polarization: From spatiotemporal signaling to cytoskeletal  
1440 dynamics. *Mol Cell Neurosci* 84, 11-28 -- <http://www.ncbi.nlm.nih.gov/pubmed/28363876>
- 1441 Schüle, R., Wiethoff, S., Martus, P., Karle, K. N., Otto, S., Klebe, S., Klimpe, S., Gallenmüller, C.,  
1442 Kurzwelly, D., Henkel, D., Rimmel, F., Stolze, H., Kohl, Z., Kassubek, J., Klockgether, T., Vielhaber,  
1443 S., Kamm, C., Klopstock, T., Bauer, P., Züchner, S., Liepelt-Scarfone, I., Schöls, L. (2016). Hereditary  
1444 spastic paraplegia: Clinicogenetic lessons from 608 patients. *Annals of Neurology* 79, 646-658 --  
1445 <https://onlinelibrary.wiley.com/doi/abs/10.1002/ana.24611>
- 1446 Sharp, D. J., Ross, J. L. (2012). Microtubule-severing enzymes at the cutting edge. *J Cell Sci* 125, 2561-9 -  
1447 <http://www.ncbi.nlm.nih.gov/pubmed/22595526>
- 1448 Shaw, G., Bray, D. (1977). Movement and extension of isolated growth cones. *Exp Cell Res* 104, 55-62 --  
1449 [http://www.ncbi.nlm.nih.gov/entrez/query.fcgi?cmd=Retrieve&db=PubMed&dopt=Citation&list\\_uids=55](http://www.ncbi.nlm.nih.gov/entrez/query.fcgi?cmd=Retrieve&db=PubMed&dopt=Citation&list_uids=556695)  
1450 [6695](http://www.ncbi.nlm.nih.gov/entrez/query.fcgi?cmd=Retrieve&db=PubMed&dopt=Citation&list_uids=556695)
- 1451 Sheng, Z. H. (2017). The interplay of axonal energy homeostasis and mitochondrial trafficking and  
1452 anchoring. *Trends Cell Biol* 27, 403-416 -- <http://www.ncbi.nlm.nih.gov/pubmed/28228333>
- 1453 Shin, S., Lim, S., Jeong, H., Kwan, L., Kim, Y. (2018). Visualization of tau-tubulin interaction in a living cell  
1454 using bifluorescence complementation technique. *International Journal of Molecular Sciences* 19,  
1455 2978 -- <http://www.mdpi.com/1422-0067/19/10/2978>
- 1456 Shin, S. C., Im, S.-K., Jang, E.-H., Jin, K. S., Hur, E.-M., Kim, E. E. (2019). Structural and molecular basis  
1457 for katanin-mediated severing of glutamylated microtubules. *Cell Reports* 26, 1357-1367.e5 --  
1458 <https://doi.org/10.1016/j.celrep.2019.01.020>
- 1459 Shoukier, M., Neesen, J., Sauter, S. M., Argyriou, L., Doerwald, N., Pantakani, D. V., Mannan, A. U.  
1460 (2009). Expansion of mutation spectrum, determination of mutation cluster regions and predictive  
1461 structural classification of SPAST mutations in hereditary spastic paraplegia. *Eur J Hum Genet* 17,  
1462 187-94 -- <http://www.ncbi.nlm.nih.gov/pubmed/18701882>

- 1463 Shpetner, H. S., Vallee, R. B. (1989). Identification of dynamin, a novel mechanochemical enzyme that  
1464 mediates interactions between microtubules. *Cell* 59, 421-32 --  
1465 <http://www.ncbi.nlm.nih.gov/pubmed/2529977>
- 1466 Sirajuddin, M., Rice, L. M., Vale, R. D. (2014). Regulation of microtubule motors by tubulin isotypes and  
1467 post-translational modifications. *Nat Cell Biol* 16, 335-344 -- <http://dx.doi.org/10.1038/ncb2920>
- 1468 Skruber, K., Read, T.-A., Vitriol, E. A. (2018). Reconsidering an active role for G-actin in cytoskeletal  
1469 regulation. *J Cell Sci* 131 -- <http://jcs.biologists.org/content/joces/131/1/jcs203760.full.pdf>
- 1470 Smith, D. H., Nonaka, M., Miller, R., Leoni, M., Chen, X. H., Alsop, D., Meaney, D. F. (2000). Immediate  
1471 coma following inertial brain injury dependent on axonal damage in the brainstem. *J Neurosurg* 93,  
1472 315-22 -- <http://www.ncbi.nlm.nih.gov/pubmed/10930019>
- 1473 Solowska, J. M., Baas, P. W. (2015). Hereditary spastic paraplegia SPG4: what is known and not known  
1474 about the disease. *Brain* 138, 2471-84 -- <http://www.ncbi.nlm.nih.gov/pubmed/26094131>
- 1475 Song, Y., Kirkpatrick, L. L., Schilling, A. B., Helseth, D. L., Chabot, N., Keillor, J. W., Johnson, G. V., Brady,  
1476 S. T. (2013). Transglutaminase and polyamination of tubulin: posttranslational modification for  
1477 stabilizing axonal microtubules. *Neuron* 78, 109-23 -- <http://www.ncbi.nlm.nih.gov/pubmed/23583110>
- 1478 Soppina, V., Herbstman, J. F., Skiniotis, G., Verhey, K. J. (2012). Luminal localization of alpha-tubulin K40  
1479 acetylation by cryo-EM analysis of fab-labeled microtubules. *PLoS One* 7, e48204 --  
1480 <http://www.ncbi.nlm.nih.gov/pubmed/23110214>
- 1481 Sorbara, C. D., Wagner, N. E., Ladwig, A., Nikic, I., Merkler, D., Kleele, T., Marinkovic, P., Naumann, R.,  
1482 Godinho, L., Bareyre, F. M., Bishop, D., Misgeld, T., Kerschensteiner, M. (2014). Pervasive axonal  
1483 transport deficits in multiple sclerosis models. *Neuron* 84, 1183-90 --  
1484 <http://www.ncbi.nlm.nih.gov/pubmed/25433639>
- 1485 Staff, N. P., Podratz, J. L., Grassner, L., Bader, M., Paz, J., Knight, A. M., Loprinzi, C. L., Trushina, E.,  
1486 Windebank, A. J. (2013). Bortezomib alters microtubule polymerization and axonal transport in rat  
1487 dorsal root ganglion neurons. *Neurotoxicology* 39, 124-31 --  
1488 <http://www.ncbi.nlm.nih.gov/pubmed/24035926>
- 1489 Steinmetz, M. O., Prota, A. E. (2018). Microtubule-targeting agents: strategies to hijack the cytoskeleton.  
1490 *Trends Cell Biol* 28, 776-792 -- <https://doi.org/10.1016/j.tcb.2018.05.001>
- 1491 Stewart, A., Tsubouchi, A., Rolls, M. M., Tracey, W. D., Sherwood, N. T. (2012). Katanin p60-like1  
1492 promotes microtubule growth and terminal dendrite stability in the larval class IV sensory neurons of  
1493 *Drosophila*. *The Journal of Neuroscience* 32, 11631-11642 --  
1494 <http://www.jneurosci.org/content/jneuro/32/34/11631.full.pdf>
- 1495 Stokin, G. B., Lillo, C., Falzone, T. L., Bruschi, R. G., Rockenstein, E., Mount, S. L., Raman, R., Davies, P.,  
1496 Masliah, E., Williams, D. S., Goldstein, L. S. (2005). Axonopathy and transport deficits early in the  
1497 pathogenesis of Alzheimer's disease. *Science* 307, 1282-8 --  
1498 <http://www.ncbi.nlm.nih.gov/pubmed/15731448>
- 1499 Stone, M. C., Rao, K., Gheres, K. W., Kim, S., Tao, J., La Rochelle, C., Folker, C. T., Sherwood, N. T.,  
1500 Rolls, M. M. (2012). Normal spastin gene dosage is specifically required for axon regeneration. *Cell*  
1501 *Rep* 2, 1340-50 -- <http://www.ncbi.nlm.nih.gov/pubmed/23122959>
- 1502 Stroud, M. J., Nazgiewicz, A., McKenzie, E. A., Wang, Y., Kammerer, R. A., Ballestrem, C. (2014). GAS2-  
1503 like proteins mediate communication between microtubules and actin through interactions with end-  
1504 binding proteins. *J Cell Sci* 127, 2672-82 -- <http://www.ncbi.nlm.nih.gov/pubmed/24706950>
- 1505 Sturgill, E. G., Ohi, R. (2013). Microtubule-regulating kinesins. *Current Biology* 23, R946-R948 --  
1506 <http://www.sciencedirect.com/science/article/pii/S0960982213009883>
- 1507 Sturrock, R. R. (1987). Age-related changes in the number of myelinated axons and glial cells in the  
1508 anterior and posterior limbs of the mouse anterior commissure. *J Anat* 150, 111-127 --  
1509 <https://www.ncbi.nlm.nih.gov/pubmed/3654327>
- 1510 Subramaniyan Parimalam, S., Tarhan, M. C., Karsten, S. L., Fujita, H., Shintaku, H., Kotera, H., Yokokawa,  
1511 R. (2016). On-chip microtubule gliding assay for parallel measurement of tau protein species. *Lab on a*  
1512 *Chip* 16, 1691-1697 -- <http://dx.doi.org/10.1039/C5LC01486G>
- 1513 Sudo, H., Baas, P. W. (2010). Acetylation of microtubules influences their sensitivity to severing by katanin  
1514 in neurons and fibroblasts. *J Neurosci* 30, 7215-26 -- <http://www.ncbi.nlm.nih.gov/pubmed/20505088>
- 1515 Sumino, Y., Nagai, K. H., Shitaka, Y., Tanaka, D., Yoshikawa, K., Chate, H., Oiwa, K. (2012). Large-scale  
1516 vortex lattice emerging from collectively moving microtubules. *Nature* 483, 448-52 --  
1517 <http://www.ncbi.nlm.nih.gov/pubmed/22437613>



- 1518 Takei, Y., Teng, J., Harada, A., Hirokawa, N. (2000). Defects in axonal elongation and neuronal migration  
1519 in mice with disrupted *tau* and *map1b* genes. *J. Cell Biol.* 150, 989-1000 --  
1520 [http://www.ncbi.nlm.nih.gov/entrez/query.fcgi?cmd=Retrieve&db=PubMed&dopt=Citation&list\\_uids=10](http://www.ncbi.nlm.nih.gov/entrez/query.fcgi?cmd=Retrieve&db=PubMed&dopt=Citation&list_uids=10973990)  
1521 [973990](http://www.ncbi.nlm.nih.gov/entrez/query.fcgi?cmd=Retrieve&db=PubMed&dopt=Citation&list_uids=10973990)
- 1522 Tang-Schomer, M. D., Johnson, V. E., Baas, P. W., Stewart, W., Smith, D. H. (2012). Partial interruption of  
1523 axonal transport due to microtubule breakage accounts for the formation of periodic varicosities after  
1524 traumatic axonal injury. *Exp Neurol* 233, 364-72 -- <http://www.ncbi.nlm.nih.gov/pubmed/22079153>
- 1525 Tao, J., Feng, C., Rolls, M. M. (2016). The microtubule-severing protein fidgetin acts after dendrite injury to  
1526 promote their degeneration. *J Cell Sci* 129, 3274-81 -- <http://www.ncbi.nlm.nih.gov/pubmed/27411367>
- 1527 Tarrade, A., Fassier, C., Courageot, S., Charvin, D., Vitte, J., Peris, L., Thorel, A., Mouisel, E.,  
1528 Fonknechten, N., Roblot, N., Seilhean, D., Dierich, A., Hauw, J. J., Melki, J. (2006). A mutation of  
1529 spastin is responsible for swellings and impairment of transport in a region of axon characterized by  
1530 changes in microtubule composition. *Hum Mol Genet* 15, 3544-58 --  
1531 <http://www.ncbi.nlm.nih.gov/pubmed/17101632>
- 1532 Tas, R. P., Chazeau, A., Cloin, B. M. C., Lambers, M. L. A., Hoogenraad, C. C., Kapitein, L. C. (2017).  
1533 Differentiation between oppositely oriented microtubules controls polarized neuronal transport. *Neuron*  
1534 -- <https://www.sciencedirect.com/science/article/pii/S0896627317310711>
- 1535 Tedeschi, A., Bradke, F. (2016). Spatial and temporal arrangement of neuronal intrinsic and extrinsic  
1536 mechanisms controlling axon regeneration. *Curr Opin Neurobiol* 42, 118-127 --  
1537 <http://www.ncbi.nlm.nih.gov/pubmed/28039763>
- 1538 Ti, S.-C., Alushin, G. M., Kapoor, T. M. (2018). Human  $\beta$ -tubulin isoforms can regulate microtubule  
1539 protofilament number and stability. *Developmental Cell* 47, 175-190.e5 --  
1540 <http://www.sciencedirect.com/science/article/pii/S1534580718306841>
- 1541 Tint, I., Jean, D., Baas, P. W., Black, M. M. (2009). Doublecortin associates with microtubules preferentially  
1542 in regions of the axon displaying actin-rich protrusive structures. *J Neurosci* 29, 10995-1010 --  
1543 [http://www.ncbi.nlm.nih.gov/entrez/query.fcgi?cmd=Retrieve&db=PubMed&dopt=Citation&list\\_uids=19](http://www.ncbi.nlm.nih.gov/entrez/query.fcgi?cmd=Retrieve&db=PubMed&dopt=Citation&list_uids=19726658)  
1544 [726658](http://www.ncbi.nlm.nih.gov/entrez/query.fcgi?cmd=Retrieve&db=PubMed&dopt=Citation&list_uids=19726658)
- 1545 Triclin, S., Inoue, D., Gaillard, J., Htet, Z. M., De Santis, M., Portran, D., Derivery, E., Aumeier, C.,  
1546 Schaedel, L., John, K., Letierrier, C., Reck-Peterson, S., Blanchoin, L., Thery, M. (2018). Self-repair  
1547 protects microtubules from their destruction by molecular motors. *bioRxiv*, 499020 --  
1548 <https://www.biorxiv.org/content/biorxiv/early/2018/12/17/499020.full.pdf>
- 1549 Trinczek, B., Ebnet, A., Mandelkow, E. M., Mandelkow, E. (1999). Tau regulates the  
1550 attachment/detachment but not the speed of motors in microtubule-dependent transport of single  
1551 vesicles and organelles. *J Cell Sci* 112, 2355-2367 --  
1552 <http://jcs.biologists.org/content/joces/112/14/2355.full.pdf>
- 1553 Tymanskyj, S. R., Yang, B., Falnikar, A., Lepore, A. C., Ma, L. (2017). MAP7 regulates axon collateral  
1554 branch development in dorsal root ganglion neurons. *J Neurosci* 37, 1648-1661 --  
1555 <http://www.ncbi.nlm.nih.gov/pubmed/28069923>
- 1556 Valenstein, M. L., Roll-Mecak, A. (2016). Graded control of microtubule severing by tubulin glutamylation.  
1557 *Cell* 164, 911-21 --  
1558 <https://www.sciencedirect.com/science/article/pii/S0092867416000593?via%3Dihub>
- 1559 van der Vaart, B., van Riel, Wilhelmina E., Doodhi, H., Kevenaar, Josta T., Katrukha, Eugene A., Gummy, L.,  
1560 Bouchet, Benjamin P., Grigoriev, I., Spangler, Samantha A., Yu, Ka L., Wulf, Phebe S., Wu, J.,  
1561 Lansbergen, G., van Battum, Eljo Y., Pasterkamp, R. J., Mimori-Kiyosue, Y., Demmers, J., Olieric, N.,  
1562 Maly, Ivan V., Hoogenraad, Casper C., Akhmanova, A. (2013). CFEOM1-associated kinesin KIF21A is  
1563 a cortical microtubule growth inhibitor. *Developmental Cell* 27, 145-160 --  
1564 <http://dx.doi.org/10.1016/j.devcel.2013.09.010>
- 1565 van Haren, J., Wittmann, T. (2019). Microtubule plus end dynamics – do we know how microtubules grow?  
1566 *BioEssays* 41, 1800194 -- <https://onlinelibrary.wiley.com/doi/abs/10.1002/bies.201800194>
- 1567 VanDelinder, V., Adams, P. G., Bachand, G. D. (2016a). Mechanical splitting of microtubules into  
1568 protofilament bundles by surface-bound kinesin-1. *Sci Rep* 6, 39408 --  
1569 <http://www.ncbi.nlm.nih.gov/pubmed/28000714>
- 1570 VanDelinder, V., Brener, S., Bachand, G. D. (2016b). Mechanisms Underlying the Active Self-Assembly of  
1571 Microtubule Rings and Spools. *Biomacromolecules* 17, 1048-56 --  
1572 <http://www.ncbi.nlm.nih.gov/pubmed/26842978>

- 1573 Vemu, A., Atherton, J., Spector, J. O., Moores, C. A., Roll-Mecak, A. (2017). Tubulin isoform composition  
1574 tunes microtubule dynamics. *Mol Biol Cell* 28, 3564-3572 --  
1575 <http://www.ncbi.nlm.nih.gov/pubmed/29021343>
- 1576 Vemu, A., Szczesna, E., Zehr, E. A., Spector, J. O., Grigorieff, N., Deaconescu, A. M., Roll-Mecak, A.  
1577 (2018). Severing enzymes amplify microtubule arrays through lattice GTP-tubulin incorporation.  
1578 *Science* 361 -- <http://www.ncbi.nlm.nih.gov/pubmed/30139843>
- 1579 Villarroel-Campos, D., Gonzalez-Billault, C. (2014). The MAP1B case: an old MAP that is new again. *Dev*  
1580 *Neurobiol* 74, 953-71 -- <http://www.ncbi.nlm.nih.gov/pubmed/24700609>
- 1581 Voelzmann, A., Hahn, I., Pearce, S., Sánchez-Soriano, N. P., Prokop, A. (2016a). A conceptual view at  
1582 microtubule plus end dynamics in neuronal axons. *Brain Res Bulletin* 126, 226-37 --  
1583 <http://www.sciencedirect.com/science/article/pii/S0361923016301885>
- 1584 Voelzmann, A., Liew, Y.-T., Qu, Y., Hahn, I., Melero, C., Sánchez-Soriano, N., Prokop, A. (2017).  
1585 *Drosophila* Short stop as a paradigm for the role and regulation of spectraplakins. *Sem Cell Dev Biol*  
1586 69, 40-57 -- <http://www.sciencedirect.com/science/article/pii/S1084952117302124>
- 1587 Voelzmann, A., Okenve-Ramos, P., Qu, Y., Chojnowska-Monga, M., del Caño-Espinel, M., Prokop, A.,  
1588 Sánchez-Soriano, N. (2016b). Tau and spectraplakins promote synapse formation and maintenance  
1589 through Jun kinase and neuronal trafficking. *eLife* 5, e14694 --  
1590 <https://elifesciences.org/content/5/e14694>
- 1591 Wada, S., Rashedul Kabir, A. M., Ito, M., Inoue, D., Sada, K., Kakugo, A. (2015). Effect of length and  
1592 rigidity of microtubules on the size of ring-shaped assemblies obtained through active self-  
1593 organization. *Soft Matter* 11, 1151-1157 -- <http://dx.doi.org/10.1039/C4SM02292K>
- 1594 Walczak, C. E., Gayek, S., Ohi, R. (2013). Microtubule-depolymerizing kinesins. *Annu Rev Cell Dev Biol*  
1595 29, 417-41 -- <http://www.ncbi.nlm.nih.gov/pubmed/23875646>
- 1596 Wali, G., Sue, C. M., Mackay-Sim, A. (2018). Patient-Derived Stem Cell Models in SPAST HSP: Disease  
1597 Modelling and Drug Discovery. *Brain Sci* 8 -- <http://www.ncbi.nlm.nih.gov/pubmed/30065201>
- 1598 Wali, G., Sutharsan, R., Fan, Y., Stewart, R., Tello Velasquez, J., Sue, C. M., Crane, D. I., Mackay-Sim, A.  
1599 (2016). Mechanism of impaired microtubule-dependent peroxisome trafficking and oxidative stress in  
1600 SPAST-mutated cells from patients with Hereditary Spastic Paraplegia. *Sci Rep* 6, 27004 --  
1601 <https://doi.org/10.1038/srep27004>
- 1602 Wang, J. T., Medress, Z. A., Barres, B. A. (2012). Axon degeneration: molecular mechanisms of a self-  
1603 destruction pathway. *J Cell Biol* 196, 7-18 -- <http://www.ncbi.nlm.nih.gov/pubmed/22232700>
- 1604 Waterman-Storer, C. M., Salmon, E. D. (1997). Actomyosin-based retrograde flow of microtubules in the  
1605 lamella of migrating epithelial cells influences microtubule dynamic instability and turnover and is  
1606 associated with microtubule breakage and treadmilling. *J Cell Biol* 139, 417-34 --  
1607 [http://www.ncbi.nlm.nih.gov/entrez/query.fcgi?cmd=Retrieve&db=PubMed&dopt=Citation&list\\_uids=9334345](http://www.ncbi.nlm.nih.gov/entrez/query.fcgi?cmd=Retrieve&db=PubMed&dopt=Citation&list_uids=9334345)
- 1608
- 1609 Weiss, D., Langford, G., Seitz-Tutter, D., Maile, W. (1991). Analysis of the gliding, fishtailing and circling  
1610 motions of native microtubules. *Acta Histochem Suppl.* 41, 81-105
- 1611 Wilson, C., Gonzalez-Billault, C. (2015). Regulation of cytoskeletal dynamics by redox signaling and  
1612 oxidative stress: implications for neuronal development and trafficking. *Front Cell Neurosci* 9, 381 --  
1613 <http://www.ncbi.nlm.nih.gov/pubmed/26483635>
- 1614 Winckler, B., Faundez, V., Maday, S., Cai, Q., Guimas Almeida, C., Zhang, H. (2018). The endolysosomal  
1615 system and proteostasis: from development to degeneration. *J Neurosci* 38, 9364-9374 --  
1616 <http://www.ncbi.nlm.nih.gov/pubmed/30381428>
- 1617 Wood, J. D., Landers, J. A., Bingley, M., McDermott, C. J., Thomas-McArthur, V., Gleadall, L. J., Shaw, P.  
1618 J., Cunliffe, V. T. (2006). The microtubule-severing protein Spastin is essential for axon outgrowth in  
1619 the zebrafish embryo. *Hum Mol Genet* 15, 2763-71 --  
1620 [http://www.ncbi.nlm.nih.gov/entrez/query.fcgi?cmd=Retrieve&db=PubMed&dopt=Citation&list\\_uids=16893913](http://www.ncbi.nlm.nih.gov/entrez/query.fcgi?cmd=Retrieve&db=PubMed&dopt=Citation&list_uids=16893913)
- 1621
- 1622 Wortman, J. C., Shrestha, U. M., Barry, D. M., Garcia, M. L., Gross, S. P., Yu, C. C. (2014). Axonal  
1623 transport: how high microtubule density can compensate for boundary effects in small-caliber axons.  
1624 *Biophys J* 106, 813-23 -- [https://www.cell.com/biophysj/fulltext/S0006-3495\(14\)00075-7](https://www.cell.com/biophysj/fulltext/S0006-3495(14)00075-7)
- 1625 Wozniak, K. M., Vornov, J. J., Wu, Y., Liu, Y., Carozzi, V. A., Rodriguez-Menendez, V., Ballarini, E., Alberti,  
1626 P., Pozzi, E., Semperboni, S., Cook, B. M., Littlefield, B. A., Nomoto, K., Condon, K., Eckley, S.,  
1627 DesJardins, C., Wilson, L., Jordan, M. A., Feinstein, S. C., Cavaletti, G., Polydefkis, M., Slusher, B. S.  
1628 (2018). Peripheral Neuropathy Induced by Microtubule-Targeted Chemotherapies: Insights into Acute

- 1629 Injury and Long-term Recovery. *Cancer Res* 78, 817-829 --  
1630 <http://www.ncbi.nlm.nih.gov/pubmed/29191802>
- 1631 Wu, Y., Li, J., Zhou, J., Feng, Y. (2014). Dynamic long-term microstructural and ultrastructural alterations in  
1632 sensory nerves of rats of paclitaxel-induced neuropathic pain. *Chin Med J (Engl)* 127, 2945-52 --  
1633 <http://www.ncbi.nlm.nih.gov/pubmed/25131233>
- 1634 Wu, Y., Whiteus, C., Xu, C. S., Hayworth, K. J., Weinberg, R. J., Hess, H. F., De Camilli, P. (2017).  
1635 Contacts between the endoplasmic reticulum and other membranes in neurons. *Proc Natl Acad Sci U*  
1636 *S A* 114, E4859-e4867 -- <https://www.pnas.org/content/114/24/E4859.short>
- 1637 Xu, K., Zhong, G., Zhuang, X. (2013). Actin, Spectrin, and associated proteins form a periodic cytoskeletal  
1638 structure in axons. *Science* 339, 452-6 -- <http://www.ncbi.nlm.nih.gov/pubmed/23239625>
- 1639 Xu, Z., Schaedel, L., Portran, D., Aguilar, A., Gaillard, J., Marinkovich, M. P., Théry, M., Nachury, M. V.  
1640 (2017). Microtubules acquire resistance from mechanical breakage through intraluminal acetylation.  
1641 *Science* 356, 328-332 -- <http://science.sciencemag.org/content/sci/356/6335/328.full.pdf>
- 1642 Yamasaki, H., Itakura, C., Mizutani, M. (1991). Hereditary hypotrophic axonopathy with neurofilament  
1643 deficiency in a mutant strain of the Japanese quail. *Acta Neuropathol* 82, 427-34 -- [https://link-](https://link-springer-com.manchester.idm.oclc.org/article/10.1007/BF00293376)  
1644 [springer-com.manchester.idm.oclc.org/article/10.1007/BF00293376](https://link-springer-com.manchester.idm.oclc.org/article/10.1007/BF00293376)
- 1645 Yan, C., Wang, F., Peng, Y., Williams, C. R., Jenkins, B., Wildonger, J., Kim, H. J., Perr, J. B., Vaughan, J.  
1646 C., Kern, M. E., Falvo, M. R., O'Brien, E. T., 3rd, Superfine, R., Tuthill, J. C., Xiang, Y., Rogers, S. L.,  
1647 Parrish, J. Z. (2018). Microtubule acetylation is required for mechanosensation in *Drosophila*. *Cell Rep*  
1648 25, 1051-1065 e6 -- <http://www.ncbi.nlm.nih.gov/pubmed/30355484>
- 1649 Yap, A. S., Duszyc, K., Viasnoff, V. (2018). Mechanosensing and Mechanotransduction at Cell-Cell  
1650 Junctions. *Cold Spring Harb Perspect Biol* 10 -- <http://www.ncbi.nlm.nih.gov/pubmed/28778874>
- 1651 Yaron, A., Schuldiner, O. (2016). Common and divergent mechanisms in developmental neuronal  
1652 remodeling and dying back neurodegeneration. *Curr Biol* 26, R628-39 --  
1653 <http://www.ncbi.nlm.nih.gov/pubmed/27404258>
- 1654 Yau, K. W., van Beuningen, S. F., Cunha-Ferreira, I., Cloin, B. M., van Battum, E. Y., Will, L., Schatzle, P.,  
1655 Tas, R. P., van Krugten, J., Katrukha, E. A., Jiang, K., Wulf, P. S., Mikhaylova, M., Harterink, M.,  
1656 Pasterkamp, R. J., Akhmanova, A., Kapitein, L. C., Hoogenraad, C. C. (2014). Microtubule minus-end  
1657 binding protein CAMSAP2 controls axon specification and dendrite development. *Neuron* 82, 1058-73  
1658 -- <http://www.ncbi.nlm.nih.gov/pubmed/24908486>
- 1659 Yin, X., Kidd, G. J., Ohno, N., Perkins, G. A., Ellisman, M. H., Bastian, C., Brunet, S., Baltan, S., Trapp, B.  
1660 D. (2016). Proteolipid protein-deficient myelin promotes axonal mitochondrial dysfunction via altered  
1661 metabolic coupling. *J Cell Biol* 215, 531-542 -- <http://www.ncbi.nlm.nih.gov/pubmed/27872255>
- 1662 Yu, W., Qiang, L., Solowska, J. M., Karabay, A., Korulu, S., Baas, P. W. (2008). The microtubule-severing  
1663 proteins spastin and katanin participate differently in the formation of axonal branches. *Mol Biol Cell*  
1664 19, 1485-98 --  
1665 [http://www.ncbi.nlm.nih.gov/entrez/query.fcgi?cmd=Retrieve&db=PubMed&dopt=Citation&list\\_uids=18](http://www.ncbi.nlm.nih.gov/entrez/query.fcgi?cmd=Retrieve&db=PubMed&dopt=Citation&list_uids=18234839)  
1666 [234839](http://www.ncbi.nlm.nih.gov/entrez/query.fcgi?cmd=Retrieve&db=PubMed&dopt=Citation&list_uids=18234839)
- 1667 Zala, D., Hinckelmann, M.-V., Yu, H., da Cunha, L., Menezes, M., Liot, G., Cordelières, Fabrice P., Marco,  
1668 S., Saudou, F. (2013). Vesicular glycolysis provides on-board energy for fast axonal transport. *Cell*  
1669 152, 479-491 -- <http://www.sciencedirect.com/science/article/pii/S0092867412015516>
- 1670 Zanic, M., Widlund, P. O., Hyman, A. A., Howard, J. (2013). Synergy between XMAP215 and EB1  
1671 increases microtubule growth rates to physiological levels. *Nat Cell Biol* 15, 688–693 --  
1672 <http://dx.doi.org/10.1038/ncb2744>
- 1673 Zempel, H., Mandelkow, E. M. (2015). Tau missorting and spastin-induced microtubule disruption in  
1674 neurodegeneration: Alzheimer Disease and Hereditary Spastic Paraplegia. *Mol Neurodegener* 10, 68 -  
1675 - <http://www.ncbi.nlm.nih.gov/pubmed/26691836>
- 1676 Zhang, D., Rogers, G. C., Buster, D. W., Sharp, D. J. (2007). Three microtubule severing enzymes  
1677 contribute to the "Pacman-flux" machinery that moves chromosomes. *J Cell Biol* 177, 231-42 --  
1678 [http://www.ncbi.nlm.nih.gov/entrez/query.fcgi?cmd=Retrieve&db=PubMed&dopt=Citation&list\\_uids=17](http://www.ncbi.nlm.nih.gov/entrez/query.fcgi?cmd=Retrieve&db=PubMed&dopt=Citation&list_uids=17452528)  
1679 [452528](http://www.ncbi.nlm.nih.gov/entrez/query.fcgi?cmd=Retrieve&db=PubMed&dopt=Citation&list_uids=17452528)
- 1680 Zheng, J., Lamoureux, P., Santiago, V., Dennerll, T., Buxbaum, R. E., Heidemann, S. R. (1991). Tensile  
1681 regulation of axonal elongation and initiation. *J Neurosci* 11, 1117-25 --  
1682 [http://www.ncbi.nlm.nih.gov/entrez/query.fcgi?cmd=Retrieve&db=PubMed&dopt=Citation&list\\_uids=20](http://www.ncbi.nlm.nih.gov/entrez/query.fcgi?cmd=Retrieve&db=PubMed&dopt=Citation&list_uids=2010807)  
1683 [10807](http://www.ncbi.nlm.nih.gov/entrez/query.fcgi?cmd=Retrieve&db=PubMed&dopt=Citation&list_uids=2010807)

- 1684 Zheng, Y., Wildonger, J., Ye, B., Zhang, Y., Kita, A., Younger, S. H., Zimmerman, S., Jan, L. Y., Jan, Y. N.  
 1685 (2008). Dynein is required for polarized dendritic transport and uniform microtubule orientation in  
 1686 axons. *Nat Cell Biol* 10, 1172-80 --  
 1687 [http://www.ncbi.nlm.nih.gov/entrez/query.fcgi?cmd=Retrieve&db=PubMed&dopt=Citation&list\\_uids=18](http://www.ncbi.nlm.nih.gov/entrez/query.fcgi?cmd=Retrieve&db=PubMed&dopt=Citation&list_uids=18758451)  
 1688 [758451](http://www.ncbi.nlm.nih.gov/entrez/query.fcgi?cmd=Retrieve&db=PubMed&dopt=Citation&list_uids=18758451)
- 1689 Ziebert, F., Mohrbach, H., Kulić, I. M. (2015). Why Microtubules Run in Circles: Mechanical Hysteresis of  
 1690 the Tubulin Lattice. *Physical Review Letters* 114, 148101 --  
 1691 <http://link.aps.org/doi/10.1103/PhysRevLett.114.148101>
- 1692 Züchner, S., Nouredine, M., Kennerson, M., Verhoeven, K., Claeys, K., De Jonghe, P., Merory, J.,  
 1693 Oliveira, S. A., Speer, M. C., Stenger, J. E., Walizada, G., Zhu, D., Pericak-Vance, M. A., Nicholson,  
 1694 G., Timmerman, V., Vance, J. M. (2005). Mutations in the pleckstrin homology domain of dynamin 2  
 1695 cause dominant intermediate Charcot-Marie-Tooth disease. *Nat Genet* 37, 289-94 --  
 1696 <http://www.ncbi.nlm.nih.gov/pubmed/15731758>

1699 **Figures**

1700

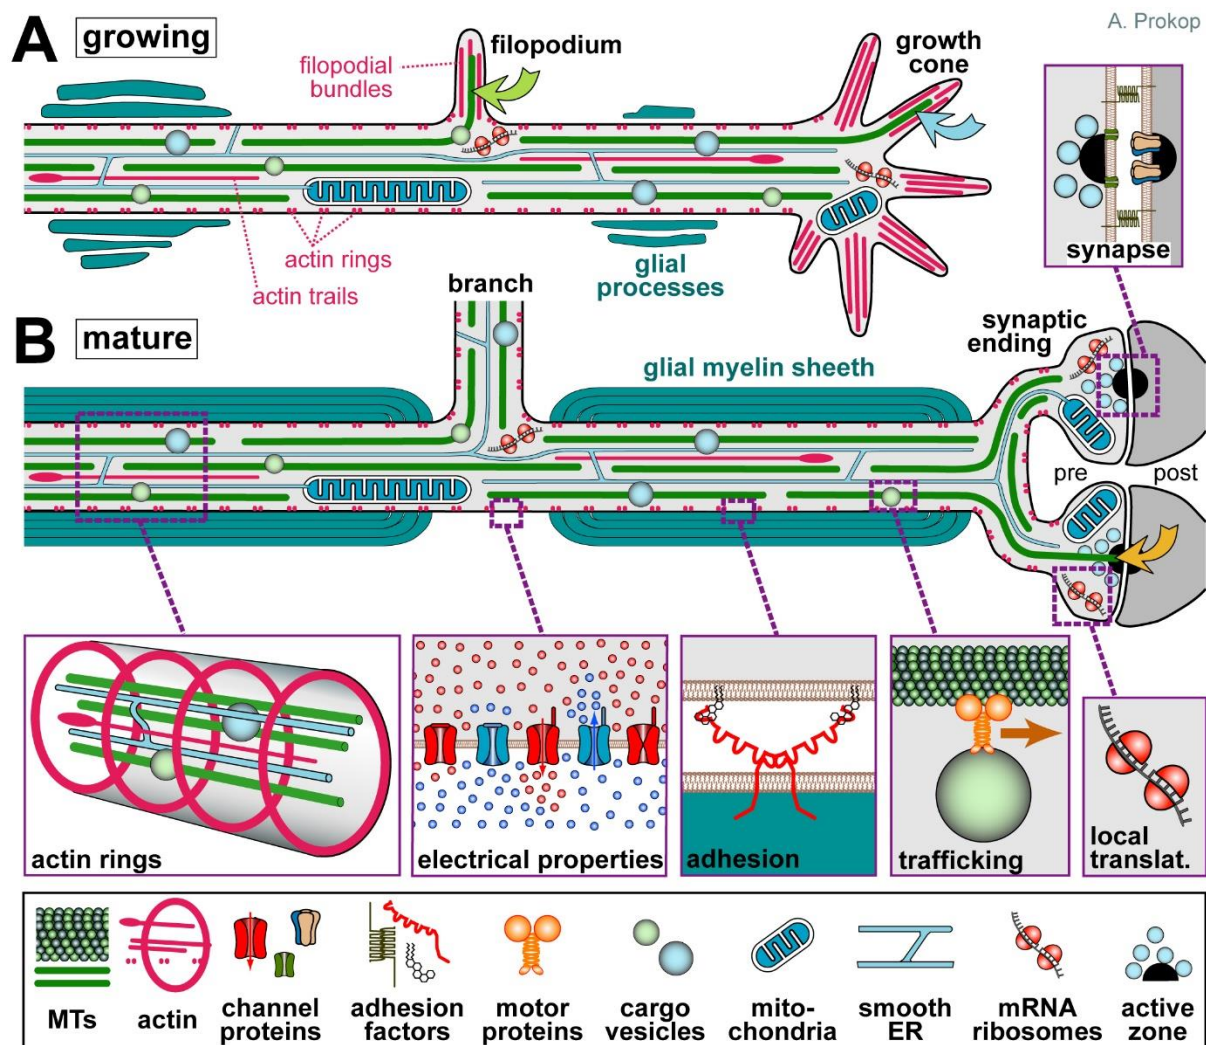

1701

1702 **Fig. 1** Specific properties of axons. Axons during the growth cone stage are shown in (A) and after synaptic  
 1703 maturation in (B), differing primarily in certain stage-specific specialisations including growth cones,  
 1704 synapses, electrical properties and glial interactions (here myelination; Pan and Chan, 2017). The core  
 1705 machinery in the axon shaft can be expected to be similar at both stages: parallel continuous bundles of

1706 extended but discontinuous MTs run all along axons serving as a structural backbone (see Fig.2), a transport  
1707 highway for axonal trafficking (driven by motor proteins), and a source for 'off-track' MTs contributing to  
1708 morphogenetic processes including branch formation, directed axon growth and synapse formation/plasticity  
1709 (green, orange, blue curved arrows); MT bundles are interspersed with longitudinal actin trails (Leterrier et  
1710 al., 2017), continuous networks of (smooth) ER (Gonzalez and Couve, 2014), and other membranous  
1711 organelles including mitochondria (Saxton and Hollenbeck, 2012); axonal membranes display regularly  
1712 spaced periodic rings of cortical actin (Qu et al., 2017; Xu et al., 2013), an unusually high number of ion-  
1713 specific channel proteins and transporters to conduct nerve impulses (Kandel et al., 2012), as well as  
1714 adhesions with external structures including parallel axons (not shown), glial processes (Pronker et al., 2016)  
1715 and synaptic partner cells (Koper et al., 2012); a degree of independence from cell-body derived proteins is  
1716 provided by local translation machinery (Cioni et al., 2018; Giuditta et al., 2002b) or supply from surrounding  
1717 glia cells (not shown; Court et al., 2011; Frühbeis et al., 2013; Giuditta et al., 2002a; Rajendran et al., 2014)  
1718 . Note that the axon diameter in the region between glia cells in B (referred to as Node of Ranvier) usually  
1719 has a much smaller diameter than the rest of the axon (Hoffman, 1995).

1720

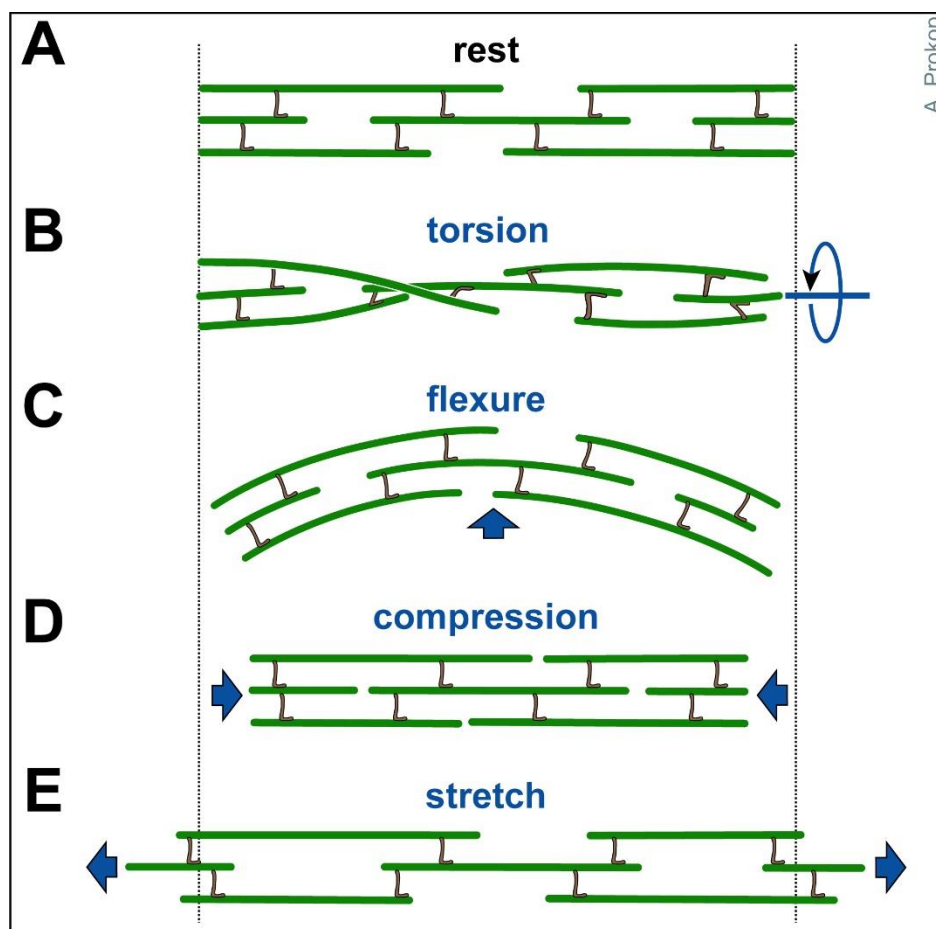

1721

1722 **Fig. 2** Axonal response to mechanical challenges. Continuous bundles of discontinuous MTs which are  
1723 flexibly cross-linked (likely involving slip-bonds) are thought to provide a structural element that can respond  
1724 to different forms of mechanical impact (as indicated in blue).

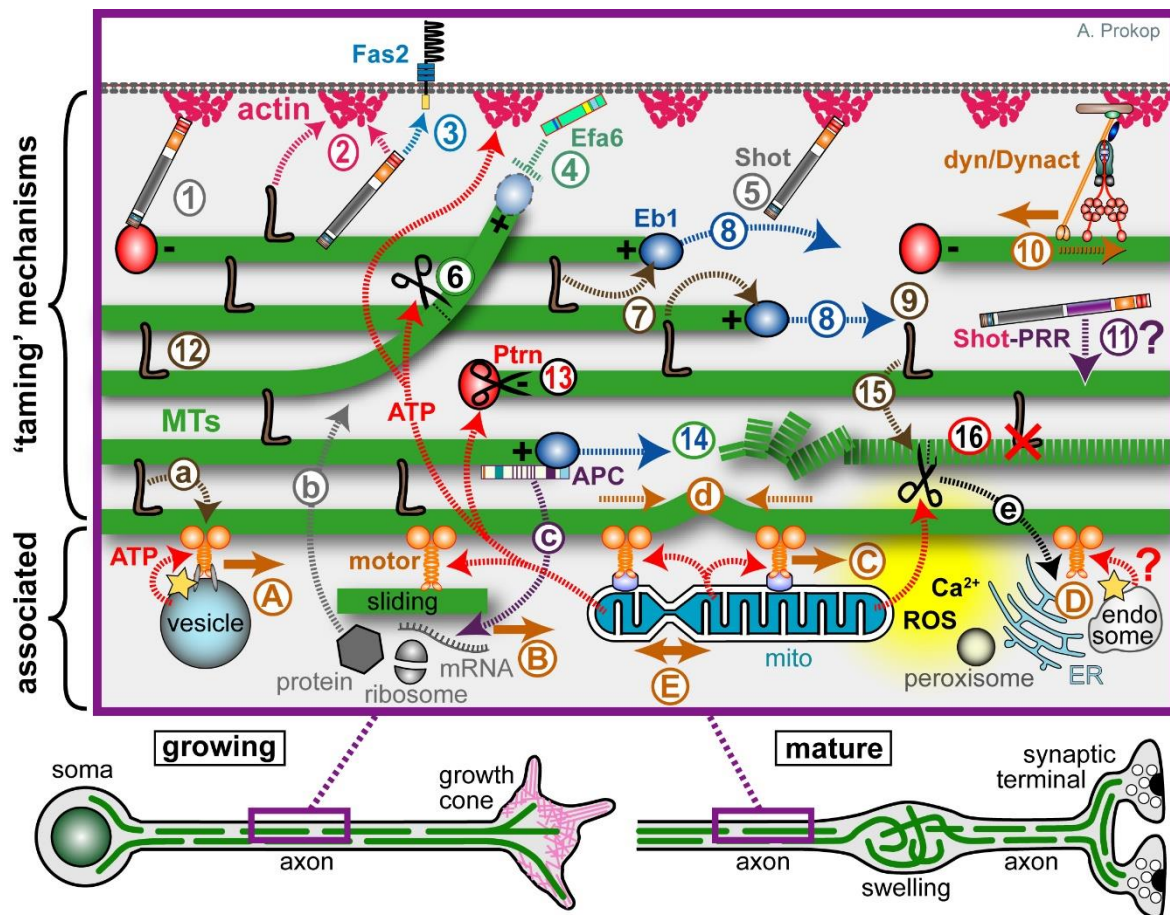

1725

1726

1727

1728

1729

1730

1731

1732

1733

1734

1735

1736

1737

1738

1739

1740

1741

1742

1743

1744

1745

1746

1747

1748

1749

1750

1751

**Fig. 3** An interactome of MT-regulating and -associated mechanisms expected to contribute within the model of local axon homeostasis. Developing and mature neurons are shown at the bottom indicating that the close-up (magenta frame) might apply in both contexts. **1-16**) Potential mechanisms that can 'tame' MTs into bundled conformation: MT polymerisation (blue stippled arrows) is driven by molecular machinery centred on Eb1 (blue balls), further influenced by the tubulin-supply machinery (not shown) and shaft-binding proteins (**7**); polymerisation generates new MTs required for bundle formation (**8**) and turn-over (**14**); to integrate into bundles, extending MTs require guidance via actin-Eb1 cross-linkage along the axonal surface (**5**; Shot) or along pre-existing MTs through MT-MT cross-linkers (**9**; brown L). The same or other cross-linkers provide the structural glue that holds MT bundles together (**12**; brown L); some of them can also bind to actin (**2**), they protect from (or recruit) MT severing activity (**15**), and influence motor protein dynamics (**a**). MTs which have escaped any cross-linkage are eliminated by cortical collapse factors when approaching the axonal surface (**4**; Efa6) or by MT severing factors at MT-MT cross-points (**6**). The bundled MTs are discontinuous; their free minus ends are stabilised by CAMSAP/Patronin (Ptrn) together with katanin (black scissors; **13**), whereas non-polymerising MT plus ends are stabilised by other factors (not shown; e.g. CLASP or the Dynactin subunit p150/Glued; Hur et al., 2011; Lazarus et al., 2013). The dynein/Dynactin complex is believed to link cortical actin to MT bundles and drive them anterogradely (**10**), whereas Ptrn at minus ends may anchor MTs via spectraplakins to the axon cortex (**1**); spectraplakins may also link MTs directly to cortical actin (**2**) or to transmembrane receptors (**3**), and they are expected to perform further, still unexplored actin-independent bundle-promoting roles through their PRR domains (**11**). Tear-and-wear damages MTs (dashed green line), potentially affecting interaction with MT-binding proteins (**16**; red X); MT severing proteins might selectively eliminate such MTs (**16**; scissors) or MTs undergo repair (not shown). **A-E**) Mechanisms closely 'associated' with MT bundles: MT-associated motor proteins ('motor', solid orange arrows) drive axonal transport of (protein-loaded) vesicles (**A**), cytoplasmic factors including proteins, translational machinery (ribosomes) or RNAs (**B**), move other MTs (**B**, sliding), and position/rearrange organelles including mitochondria (**C**, mito), ER, peroxisomes and endosome (**D**) - and this likely includes mitochondrial fission and fusion (**E**). **a-e**) The motor-associated functions all act downstream of MT bundles because they require

1752 them to walk on; but they also act upstream: for example, the forces they generate (stippled orange arrows)  
1753 are the potential cause for MT disorganisation (buckling shown in **d**); transport delivers required regulators  
1754 and building blocks for bundle-maintaining processes (**b**); the proper regulation of organelles/endocytic  
1755 compartments provides systemic factors that can orchestrate taming mechanisms, including intracellular free  
1756 calcium or reactive oxygen species ( $Ca^{2+}$ , ROS; yellow cloud) as well as ATP required for many processes  
1757 including actin dynamics, MT severing and MT motor activity (red stippled arrows; note that vesicular  
1758 transport uses glycolysis to generate its own ATP; yellow star); *vice versa*, the MT severer spastin also  
1759 regulates the ER through ATP-independent mechanisms (**e**), and MT-associated proteins (APC) regulate  
1760 local translation events (**c**).

1761

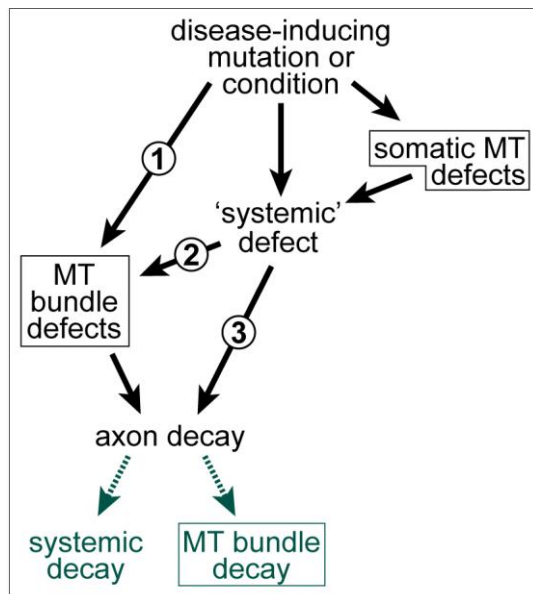

1762

1763 **Fig. 4** MT bundle defects as cause or consequence of axon decay. **1**) Disease-inducing mutations/conditions  
1764 can affect a MT-bundle regulator (e.g. dystonin; Voelzmann et al., 2017), thus causing MT bundle defects  
1765 first which can, in turn, trigger axon decay. **2**) Disease-inducing mutations/conditions can affect systemic  
1766 factors which, in turn cause MT bundle defects as an intermediate causative step in the cascade leading to  
1767 axon decay (e.g. axonal transport fails, leading to MT bundle defects which then contribute to axon decay  
1768 (e.g. Alzheimer's disease or ALS; Brandt and Bakota, 2017; Farah et al., 2003; Zempel and Mandelkow,  
1769 2015); this may occur even if MT regulators are affected, but these regulators mainly act in the cell body (e.g.  
1770 dysregulation of the Golgi; Ferrier et al., 2013). **3**) MT bundle deterioration may be a mere consequence of  
1771 axon decay, although this case will be difficult to disentangle from option 2, since MT bundle disintegration  
1772 and axonal disassembly may occur in parallel, as observed in developmental or injury-induced axon  
1773 degeneration; Bradke et al., 2012; Wang et al., 2012; Yaron and Schuldiner, 2016). All MT-related  
1774 phenotypes in this graph are emphasised with a frame.

1775

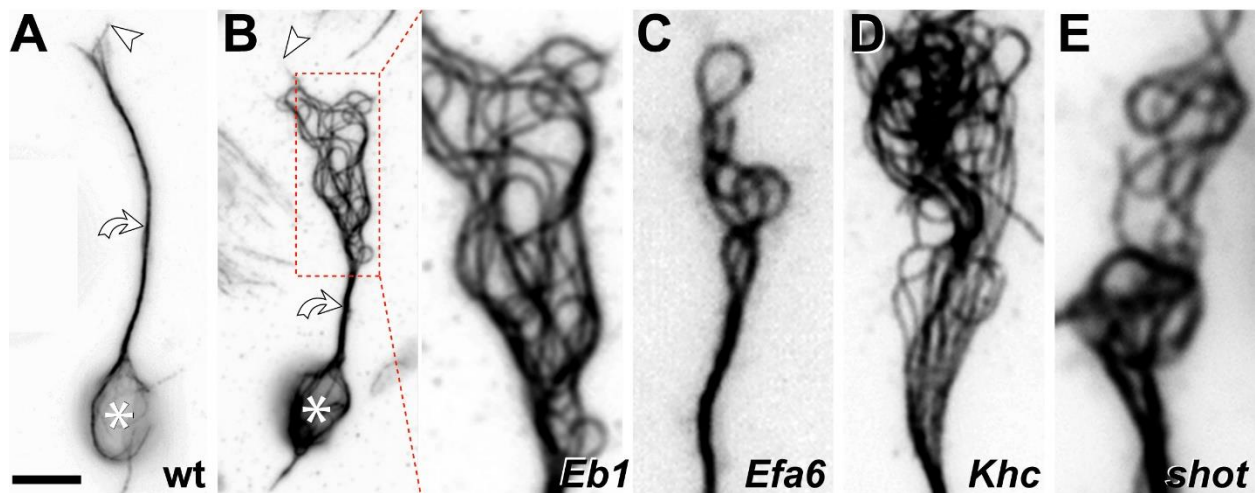

1776

1777 **Fig. 5** Disorganisation of axonal MTs upon loss of different MT regulators in *Drosophila* primary neurons. **A)**  
1778 Normal neuron (wild-type, wt) with soma (asterisk), axon shaft (curved arrow) and growth cone (tip of most  
1779 distal MT indicated by arrow head). **B)** *Eb1*<sup>5</sup> mutant neuron where the area of MT disorganisation is framed  
1780 by a red stippled box and shown as close-up on the right. **C-E)** Similar close-ups shown for *Efa6*<sup>GX6[w-]</sup>, *Khc*<sup>27</sup>  
1781 and *shot*<sup>3</sup> mutant neurons. Note that the four mutated factors perform fundamentally different molecular  
1782 functions, with Eb1 being a MT plus-end binder ('8' in Fig.3), Efa6 a cortical collapse factor ('4' in Fig.3), Khc  
1783 a kinesin-1 motor protein ('A-E' in Fig.3) and Shot a multi-functional cross-linker ('1-3, 5, 11' in Fig.3). All  
1784 neurons were derived from wild-type or homozygous mutant embryos, mechanically and chemically  
1785 dissociated, kept for 7days in pre-culture in a centrifuge tube to deplete any maternal gene product,  
1786 mechanically and chemically dissociated again, cultured on concanavalin A-coated glass coverslips for 1day  
1787 at 21°C, fixed and stained with anti- $\alpha$ -tubulin (DM1A, Sigma; procedures detailed elsewhere: Prokop et al.,  
1788 2012); images were taken using STED (stimulated emission depletion) microscopy. Scale bar in A represents  
1789 10  $\mu$ m for the two neurons and 4  $\mu$ m in close-ups.

1790



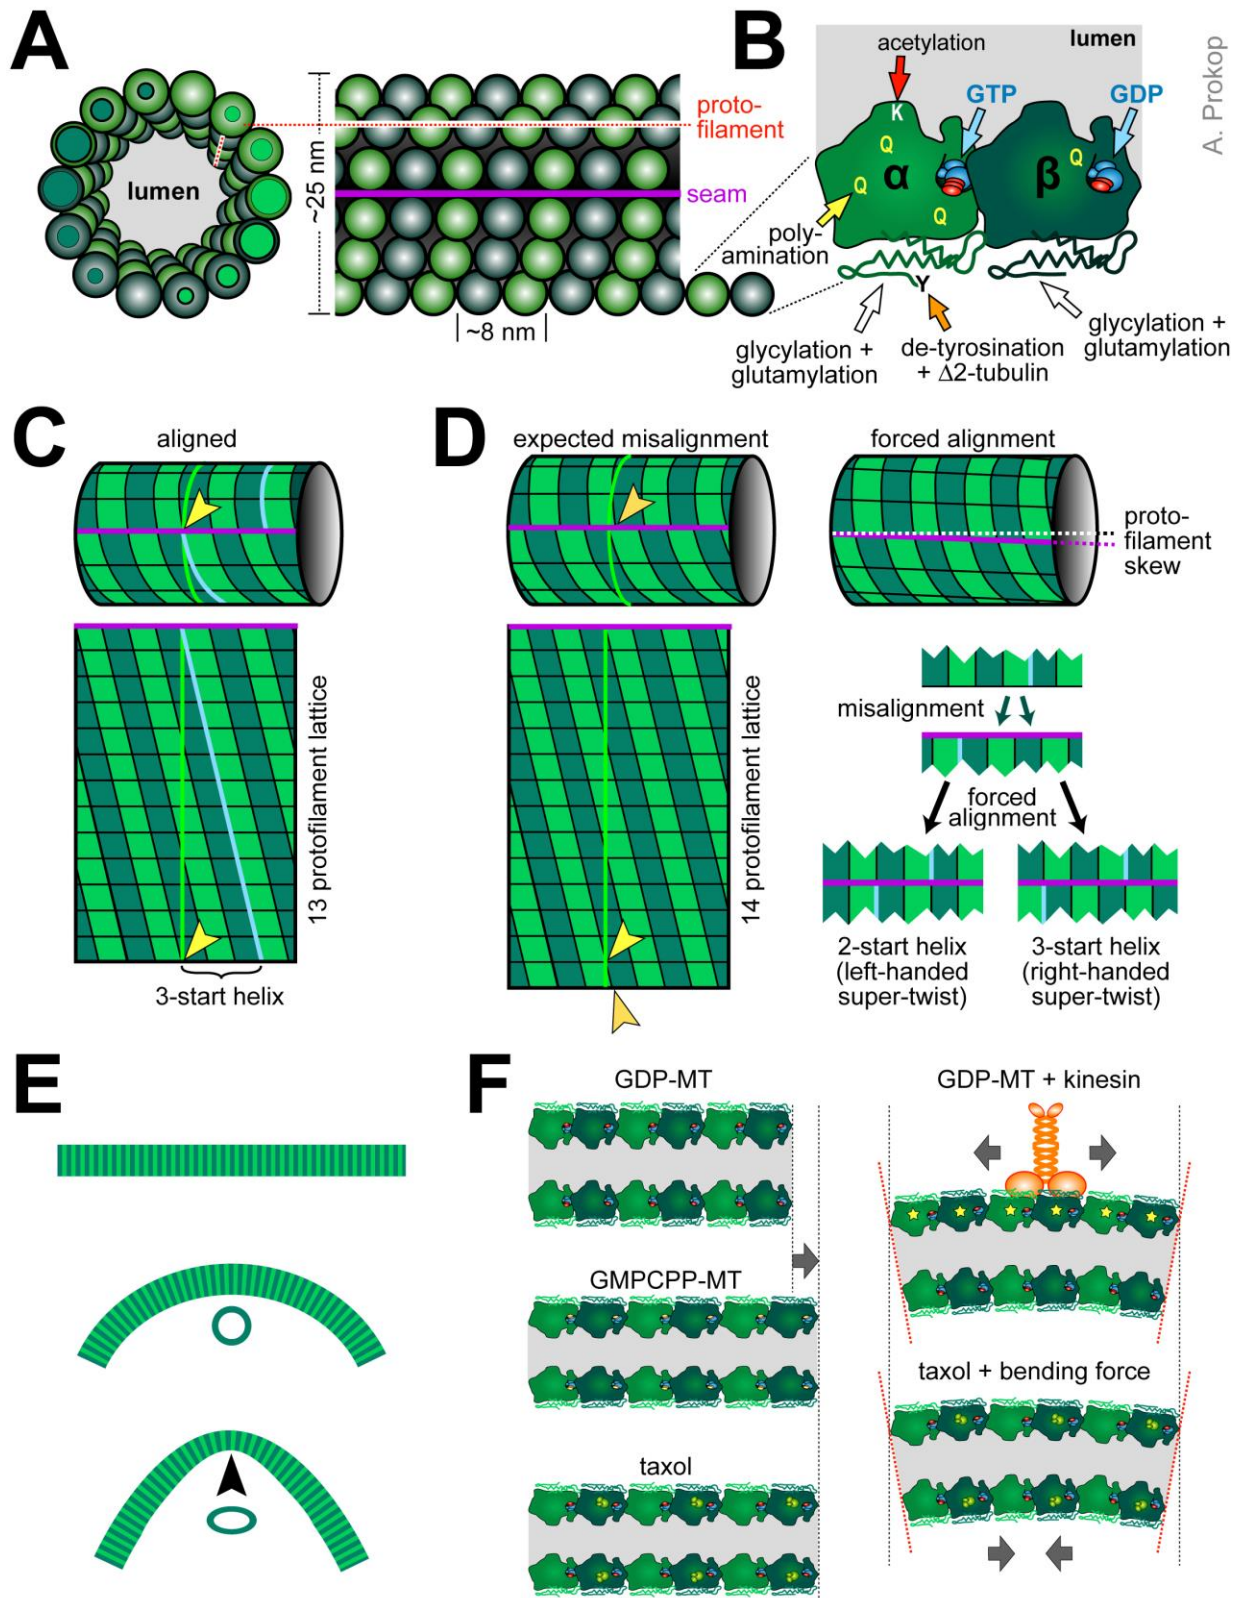

A. Prokop

1791

1792 **Fig. 6** A molecular perspective of microtubule properties. **A)** Cross-section of a MT with 14 protofilaments  
 1793 (PF) and lateral view of a 13 PF MT, both in B-lattice configuration, where  $\alpha$ -tubulins make lateral bonds with  
 1794  $\alpha$ -tubulins and  $\beta$  with  $\beta$ , except at the seam (magenta line: seam; dashed red line: PF). **B)** Close-up of an  
 1795  $\alpha/\beta$ -tubulin heterodimer showing the various post-translational modification sites as indicated; note that the  
 1796 GTP of  $\beta$ -tubulin in lattices is usually hydrolysed (GDP). **C)** A 13 PF MT (top), cut open at the seam and  
 1797 rolled out (bottom); the yellow line shows the diameter, the blue line follows the helical rise of laterally bonded

1798 tubulins; in 13 PF MTs, tubulins are precisely aligned at the seam (yellow arrow head) but shifted by three  
 1799 positions (3-start helix). **D**) When deviating from the 13 PF prototype, tubulins are misaligned at the seam  
 1800 (orange arrow head); when forced into alignment, the PFs skew, causing a super-twist of the MT as described  
 1801 by the 'lattice accommodation model' (Chrétien and Fuller, 2000; Langford, 1980); for certain PF numbers,  
 1802 MTs can form two alternative alignments, of which usually the version with the lower helix start value (left)  
 1803 has a left-handed super-twist, the higher value is right-handed (Chrétien and Fuller, 2000). **E**) MTs behave  
 1804 like rigid rods with a persistence length of up to 10  $\mu\text{m}$ , but can be bent down to diameters of  $\sim 1\mu\text{m}$  before  
 1805 they break; it has been reported that their cross-sectional profile may flatten above a certain threshold (black  
 1806 arrow head), thus softening the tube. **F**) Lattices of GDP-tubulin are 1-3% shorter than MTs that were  
 1807 polymerised with the non-hydrolysable GTP analogue GMPCPP, or stabilised with taxol (orange structure  
 1808 binding  $\alpha$ -tubulin 1:1, according to Nogales et al., 1995); binding of kinesin-1 causes similar lengthening of  
 1809 tubulin (and additional compactions in the tubulin structure: yellow stars) which may cause cooperative  
 1810 binding of further kinesins and induce curvature if occurring only on one side of the MT; in extended taxol-  
 1811 bound MTs, bending forces were suggested to transfer tubulins on the concave side into their short  
 1812 conformation as an energetically favoured condition. For further references see main text.

1813

1814

| condition                                                                                                   | diameters of curvature [ $\mu\text{m}$ ] <sup>a</sup>          | comments                                                                                                                                                    | ref. |
|-------------------------------------------------------------------------------------------------------------|----------------------------------------------------------------|-------------------------------------------------------------------------------------------------------------------------------------------------------------|------|
| standard tub, 10-20 $\mu\text{m}$ taxol (after?) <sup>b</sup> polym.                                        | 1-1.4 <sup>c</sup>                                             | waves and curls upon pinning                                                                                                                                | [1]  |
| standard tub, 50 $\mu\text{M}$ taxol during & after polym.; high MT density (2.5 MTs/ $\mu\text{m}^2$ )     | 1-5                                                            | loops form through collision; loop duration up frequently >5 min; strong increase in loops at high MT conc.; decreasing loop radius with increasing contour | [2]  |
| rhodamine-tub, 10 $\mu\text{m}$ taxol after polym.; exposing to air bubble or n-heptane                     | 1.1 (heptane), 1.8 (air)                                       | MTs become reversibly unstable in non-polar conditions: 50% of MTs form loops as long as close to air bubble; effect absolutely requires kinesins           | [3]  |
| rhodamine-tub, 10 $\mu\text{M}$ taxol after polym.                                                          | 2.5-3.75 <sup>c</sup>                                          | left-handed supertwist favours CCW rotation of loops; CCW rotation is preserved in spools                                                                   | [4]  |
| biotin-tub, 10 $\mu\text{m}$ taxol after polym.; SA-linked                                                  | 1-12.6, mean 3.9                                               |                                                                                                                                                             |      |
| biotin-tub, 10 $\mu\text{m}$ taxol after polym.; SA-linked                                                  | 1-5, mean 2.3                                                  | up to 25 $\mu\text{m}$ long straight bundles; pinning of tip induces spools or fishtailing; rare "unspooling" events                                        | [5]  |
| biotin-tub, 10 $\mu\text{m}$ taxol after polym.; SA-linked; 1600, 870, 270 and 90 kinesins/ $\mu\text{m}^2$ | ca. 2.4-4                                                      | highest spool density & lowest spool diameter @ highest kinesin density; pinning as main cause for spool formation                                          | [6]  |
| biotin-GTP-tub, 10 $\mu\text{m}$ taxol after polym.; SA-linked                                              | 5.7 (@ 10.8 $\mu\text{m}$ length), 3 (@ 3.7 $\mu\text{m}$ )    | spool diameters increase with MT length per condition; spool diameters: GMP-MTs (taxol) < GMPCPP-MTs (no taxol) < GMPCPP-MTs (taxol)                        | [7]  |
| biotin-GMPCPP-tub, 10 $\mu\text{m}$ taxol after polym.; SA-linked                                           | 18.8 (@ 10.3 $\mu\text{m}$ length), 5.8 (@ 3.4 $\mu\text{m}$ ) |                                                                                                                                                             |      |
| biotin-GMPCPP-tub, no taxol; SA-linked                                                                      | 8.2 (@ 10 $\mu\text{m}$ length), 4.3 (@ 3.4 $\mu\text{m}$ )    |                                                                                                                                                             |      |

|                                                                                                   |                                              |                                                                                                                                                                                                                              |      |
|---------------------------------------------------------------------------------------------------|----------------------------------------------|------------------------------------------------------------------------------------------------------------------------------------------------------------------------------------------------------------------------------|------|
| biotin-GTP-tub, 10 $\mu\text{m}$ taxol (after?) <sup>b</sup> polym.; SA-linked                    | 3.2 $\mu\text{m}$ (@ 6 $\mu\text{m}$ length) | live imaging: pinning & collisions (simultaneous sticking) cause spool formation; spool formation is not activated by a Brownian ratchet type process                                                                        | [8]  |
| biotin-tub, 10 $\mu\text{m}$ taxol after polym.; SA-linked; microfluidic device                   | 2.7 (pinning), 6.2 (collisions)              | live imaging: pinning & collisions (simultaneous sticking) cause spools of different diameters; pinning more frequent in flow cells than microfluidic device                                                                 | [9]  |
| biotin-tub, (taxol?) <sup>b</sup> polym.; SA-quantum dot-linked                                   | 1.2, mean 3.4                                | left/right-handed super-twist: CCW/CW rotation; rings form intertwined wreath-like structures; tendency to disassemble involving MT breakage, kinesins pulling (blocked by AMP-PNP), counteracted by SA (enhanced by biotin) | [10] |
| biotin-tub, 10 $\mu\text{m}$ taxol after polym.; SA-quantum dot-linked; patterned kinesin carpets | 1-5.3 and 3.1                                | smallest spool diameters on constrained carpets: 1-5.3 $\mu\text{m}$ on 5 $\mu\text{m}$ stripes, 3.1 $\mu\text{m}$ on 2 $\mu\text{m}$ wide squares                                                                           | [11] |

1815 **Tab. 2** MT loop or spool formation in gliding assays under different conditions. a) primarily the lower range  
 1816 of mentioned diameters is listed; b) not clear from experimental section; c) measured from images.  
 1817 References [1] (Amos and Amos, 1991), [2] (Liu et al., 2011), [3] (Rashedul Kabir et al., 2012), [4] (Kawamura  
 1818 et al., 2008), [5] (Hess et al., 2005), [6] (Lam et al., 2014), [7] (Wada et al., 2015), [8] (Luria et al., 2011), [9]  
 1819 (VanDelinder et al., 2016b), [10] (Liu et al., 2008), [11] (Liu and Bachand, 2013)
